# Supplementary material
Source: PubMed Central journal article supplement (PMC3097137)

**Improved Total Synthesis of the Potent HDAC Inhibitor FK228 (FR-901228)**

*Thomas J. Greshock, Deidre M. Johns, Yasuo Noguchi, and Robert M. Williams\**

Department of Chemistry, Colorado State University, Fort Collins, Colorado 80523

University of Colorado Cancer Center, Aurora, Colorado 80045

rmw@lamar.colostate.edu

**General Methods.** All air or moisture sensitive reactions were performed under a positive pressure of argon in flame-dried glassware. Tetrahydrofuran (THF), toluene, diethyl ether (Et<sub>2</sub>O), N,N-dimethylformamide (DMF), dichloromethane, acetonitrile, and triethylamine were obtained from a dry solvent system (activated alumina columns, positive pressure of argon). Column chromatography was performed on Merck silica gel Kieselgel 60 (230-400 mesh). Melting points were determined in open-end capillary tubes and are uncorrected. <sup>1</sup>H NMR and <sup>13</sup>C NMR spectra were recorded on Varian 300, 400 or 500 MHz spectrometers. Chemical shifts are reported in ppm relative to CHCl<sub>3</sub> at δ 7.27 (<sup>1</sup>H NMR) and δ 77.23 (<sup>13</sup>C NMR) or DMSO-d<sub>6</sub> at δ 2.5 (<sup>1</sup>H NMR) and δ 39.51 (<sup>13</sup>C NMR) or MeOH-d<sub>4</sub> δ 3.31 (<sup>1</sup>H NMR) and δ 49.15 (<sup>13</sup>C NMR). Mass spectra were obtained on Fisons VG Autospec. IR spectra were obtained from thin films on a NaCl plate using a Perkin-Elmer 1600 series FT-IR spectrometer. Optical rotations were collected at 589 nm on a Rudolph Research automatic polarimeter Autopol III.

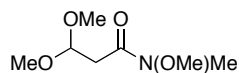

***N,O*-Dimethyl-1,1-dimethoxypropylhydroxylamide (9)**. To a solution of methyl 3,3-dimethoxypropionate **8** (55.0 g, 0.37 mol) and *N,O*-dimethylhydroxylamine hydrochloride (39.8 g, 0.408 mol) in THF (750 mL) was added *i*PrMgCl (408 mL, 2.0 M in THF, 0.817 mol) over 1 hour at -10 °C to create a homogeneous reaction mixture. After stirring for 1.5 hours at 0 °C, the reaction was poured into a mixture of ice and saturated *aq.* NH<sub>4</sub>Cl. The reaction mixture was extracted with CH<sub>2</sub>Cl<sub>2</sub>, washed with brine, dried over anhydrous Na<sub>2</sub>SO<sub>4</sub>, and concentrated to dryness *in vacuo* to give crude mixture (colorless oil containing 30% MeOH elimination byproduct by <sup>1</sup>H NMR). To a solution of the crude mixture in MeOH (400 mL) was added anhydrous K<sub>2</sub>CO<sub>3</sub> (9.5 g, 69.3 mmol) at room temperature. After stirring for 1.5 days, the solution was evaporated *in vacuo*. The residue was diluted with CH<sub>2</sub>Cl<sub>2</sub> and washed with H<sub>2</sub>O and brine. The organic extract was dried over anhydrous Na<sub>2</sub>SO<sub>4</sub> and concentrated to dryness *in vacuo*. The crude product was purified by silica gel chromatography (2 : 1 to 4 : 1 EtOAc/hexanes) affording **9** as a yellow oil. It was subsequently found that the product can be purified by distillation under HVAC (65 - 75 °C). The methyl ester starting material distills at 42 °C under the same HVAC pressure. The mixed fractions were purified by distillation under HVAC pressure to provide additional desired product, which was combined with the product above to provide **9** as a mixture of amide rotamers (43.8 g, 247 mmol, 67%); <sup>1</sup>H NMR (400 MHz, CDCl<sub>3</sub>) δ 4.78 (t, *J* = 6 Hz, 1 H), 3.61 (s, 3 H), 3.31 (s, 6 H), 3.10 (s, 3 H), 2.69 (d, *J* = 6 Hz, 2 H); <sup>13</sup>C NMR (100 MHz, CDCl<sub>3</sub>) δ 170.6, 161.6, 102.3, 61.4, 60.4, 54.2, 36.4, 31.9; IR (neat) 3565, 2940, 2833, 1663, 1601, 1444, 1389, 1191, 1124,

1069, 998, 921, 844, 785  $\text{cm}^{-1}$ ; ESI/APCI-HRMS (M-OCH<sub>3</sub>) calcd for C<sub>6</sub>H<sub>12</sub>NO<sub>3</sub> 146.0812, found 146.0805.

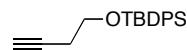

**4-tert-Butyldiphenylsilyloxy-1-butyne (10).**<sup>1</sup> To a solution of 3-butyne-1-ol (10.8 g, 0.154 mol), DMAP (1.85 g, 15.1 mmol), and triethylamine (23 mL, 0.166 mol) in CH<sub>2</sub>Cl<sub>2</sub> (250 mL) was added TBDPSCI (44.3 g, 0.161 mol) *via* canula at rt. After stirring at rt for 15 hours, the mixture was quenched with saturated *aq.* NH<sub>4</sub>Cl (100mL), and extracted with CH<sub>2</sub>Cl<sub>2</sub> (100 mL). The organic extract was washed with brine (100 mL), dried over anhydrous Na<sub>2</sub>SO<sub>4</sub> and concentrated *in vacuo* to give the crude product. The crude product was purified by silica gel chromatography (hexanes to 9 : 1 hexanes/EtOAc) to give compound **10** as colorless oil (46.9 g, 0.15 mmol, 99 %), which is consistent with reported characterization data. <sup>1</sup>H NMR (400 MHz, CDCl<sub>3</sub>)  $\delta$  7.72 - 7.68 (m, 4 H), 7.47 - 7.39 (m, 6 H), 3.81 (t, *J* = 7 Hz, 2 H), 2.47 (dt, *J* = 3, 7 Hz, 2 H), 1.97 (t, *J* = 3 Hz, 1 H), 1.08 (s, 9 H); <sup>13</sup>C NMR (CDCl<sub>3</sub>, 100 MHz)  $\delta$  135.8, 133.7, 129.9, 127.9, 81.7, 69.5, 62.5, 27.0, 22.8, 19.4; IR (neat) 3307, 3071, 3050, 2958, 2931, 2858, 1472, 1428, 1389, 1112, 1059, 823, 701, 613  $\text{cm}^{-1}$ .

---

<sup>1</sup> Sinha, S. C.; Sinha, S. C.; Keina, E. *J. Org. Chem.* **1999**, *64*, 7067-7073. Delorme, D.; Girard, Y.; Rokach, J. *J. Org. Chem.* **1989**, *54*, 3635-3640.

S4

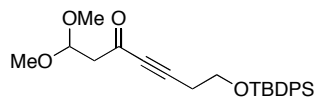

**7-(*tert*-butyldiphenylsilyloxy)-1,1-dimethoxyhept-4-yn-3-one (11).** To a solution of alkyne **10** (26.9 g, 87.3 mmol) in THF (430 mL) cooled to -78 °C was added *n*-BuLi (52 mL, 96 mmol, 1.84 M solution in hexanes) over 1 hour. The reaction was stirred an additional 30 min at -78 °C, and then amide **9** (17.0 g, 96.0 mmol) in THF (50 mL) at -78 °C was added quickly via canula. The reaction was allowed to slowly warm to 0 °C over 14 hours. It was then poured onto a saturated *aq.* NH<sub>4</sub>Cl solution, diluted with EtOAc and extracted 3 x 50 mL EtOAc. The combined organic layers were washed with brine, dried over MgSO<sub>4</sub>, filtered, and concentrated. The crude oil was purified by silica gel chromatography (20 : 1 hexanes/EtOAc + 1% Et<sub>3</sub>N) to afford **11** (27.9 g, 65.5 mmol, 75%); <sup>1</sup>H NMR (400 MHz, CDCl<sub>3</sub>) δ 7.68 - 7.63 (m, 4 H), 7.44 - 7.35 (m, 6 H), 4.91 (t, *J* = 6 Hz, 1 H), 3.80 (t, *J* = 7 Hz, 2 H), 3.31 (s, 6 H), 2.83 (d, *J* = 6 Hz, 2 H), 2.60 (t, *J* = 7 Hz, 2 H), 1.04 (s, 9 H); <sup>13</sup>C NMR (100 MHz, CDCl<sub>3</sub>) δ 183.6, 135.7, 133.3, 130.0, 128.0, 100.8, 92.3, 81.9, 61.7, 53.6, 49.0, 26.9, 23.3, 19.4; IR (neat) 3071, 2956, 2932, 2858, 2215, 1676, 1619, 1428, 1226, 1113, 1057, 703, 505 cm<sup>-1</sup>; FAB-MS (MH<sup>+</sup>) calcd for C<sub>25</sub>H<sub>33</sub>O<sub>4</sub>Si 425.2, found 425.2.

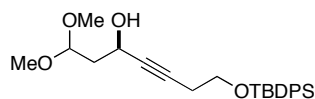

**(*R,E*)-5-hydroxy-7,7-dimethoxyhept-3-enyl 4-methylbenzenesulfonate (S-1).** To a solution of propargyl ketone **11** (14.0 g, 32.9 mmol) in *i*PrOH (300 mL) at rt was added

(*R,R*)-Ru-(TSDPEN) **12**<sup>2</sup> (505 mg, 0.82 mmol) as a solution in *i*PrOH (10 mL). The reaction mixture was stirred for 18 hours. Additional aliquots of **12** (505 mg, 0.82 mmol) as a solution in *i*PrOH (10 mL) were added after 18, 24, and 42 hours. Most of the starting material was consumed by TLC analysis after 4 days and the reaction was concentrated to a viscous oil. The mixture was purified by silica gel chromatography (10 : 1 hexanes/EtOAc, and then 4 : 1 hexanes/EtOAc) to afford the title compound **S-1** (11.9 g, 27.9 mmol, 58%); <sup>1</sup>H NMR (400 MHz, CDCl<sub>3</sub>) δ 7.69 - 7.67 (m, 4 H), 7.46 - 7.37 (m, 6 H), 4.68 (t, *J* = 6 Hz, 1 H), 4.49 (br t, *J* = 5 Hz, 1 H), 3.77 (t, *J* = 7 Hz, 2 H), 3.36 (s, 3 H), 3.34 (s, 3 H), 2.86 (br s, 1 H), 2.50 (dt, *J* = 2, 7 Hz, 2 H), 1.99 (dt, *J* = 2, 7 Hz, 2H), 1.06 (s, 9 H); <sup>13</sup>C NMR (100 MHz, CDCl<sub>3</sub>) δ 135.8, 133.8, 129.9, 127.9, 103.1, 82.7, 81.6, 62.6, 59.6, 53.8, 53.4, 39.9, 27.0, 23.1, 19.4; IR (neat) 2933, 2858, 1471, 1427, 1389, 1111, 1086, 1057, 915, 703, 511 cm<sup>-1</sup>; ESI/APCI-MS (MNa<sup>+</sup>) calcd for C<sub>25</sub>H<sub>34</sub>O<sub>4</sub>SiNa 449.21, found 449.27; [α]<sub>D</sub><sup>20</sup> = +7.7 (*c* 1.3, CHCl<sub>3</sub>).

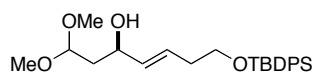

(*R,E*)-7-(*tert*-butyldiphenylsilyloxy)-1,1-dimethoxyhept-4-en-3-ol (**13**). To a solution of sodium bis(2-methoxyethoxy)aluminum hydride (Vitrider®) (0.53 mL, 2.67 mmol) in Et<sub>2</sub>O (10 mL) cooled to 0 °C was added alkyne **S-1** (758 mg, 1.78 mmol) as a solution in Et<sub>2</sub>O (8 mL) dropwise. The reaction was stirred an additional 30 min at 0 °C, additional Red-Al (0.53, 2.67 mmol) was added, stirred for 30 min at 0 °C, and then 1 hour at rt. The reaction was quenched by the addition of saturated *aq.* NH<sub>4</sub>Cl, diluted with EtOAc,

<sup>2</sup> Haak, K. J.; Hashiguchi, S.; Fujii, A.; Ikariya, T.; Noyori, R. *Angew. Chem. Int. Ed. Engl.* **1997**, *36*, 285-287.

and extracted 3 x 10 mL with EtOAc. The organic layers were combined, washed with water, brine, dried over MgSO<sub>4</sub>, filtered, and concentrated. The crude oil was purified by silica gel chromatography (10 : 1 hexanes/EtOAc + 1% Et<sub>3</sub>N) to afford **13** (0.76 g, 1.78 mmol, quant.) as a colorless oil; <sup>1</sup>H NMR (400 MHz, CDCl<sub>3</sub>) δ 7.65 - 7.62 (m, 4 H), 7.42 - 7.33 (m, 6 H), 5.66 (dt, *J* = 7, 15 Hz, 1 H), 5.49 (dd, *J* = 7, 15 Hz, 1 H), 4.54 (t, *J* = 6 Hz, 1 H), 4.22 (m, 1 H), 3.68 (t, *J* = 7 Hz, 2 H), 3.33 (s, 3 H), 3.31 (s, 3 H), 2.64 (br s, 1 H), 2.27 (q, *J* = 7 Hz, 2 H), 1.84 - 1.73 (m, 2 H), 1.02 (s, 9 H); <sup>13</sup>C NMR (100 MHz, CDCl<sub>3</sub>) δ 135.8, 134.3, 134.1, 129.8, 128.2, 127.8, 103.6, 69.5, 63.7, 53.7, 53.2, 39.7, 35.8, 27.1, 19.4; IR (neat) 3457, 3070, 3047, 2931, 2858, 1471, 1427, 1387, 1189, 1110, 969, 938, 822, 703 cm<sup>-1</sup>; ESI/APCI-MS (MNa<sup>+</sup>) calcd for C<sub>25</sub>H<sub>36</sub>O<sub>4</sub>Si 451.23, found 451.27; [α]<sub>D</sub><sup>20</sup> = +2.9 (*c* 2.25, CHCl<sub>3</sub>).

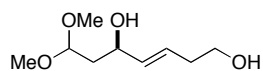

**(*R,E*)-7,7-dimethoxyhept-3-ene-1,5-diol (S-2)**. To a solution of silyl ether **13** (202 mg, 0.66 mmol) in THF (7 mL) was added TBAF (1.0 M in THF, 1.00 mL, 1.00 mmol) at room temperature. After stirring for 3.5 hours, the mixture was concentrated to dryness *in vacuo*. The crude product was purified by silica gel chromatography (7 : 1 EtOAc/hexanes to 2 : 98 MeOH/EtOAc) affording the title compound **S-2** (126 mg, 0.66 mmol, 99%) as a pale yellow oil; <sup>1</sup>H NMR (400 MHz, CDCl<sub>3</sub>) δ 5.65 (dt, *J* = 7, 15 Hz, 1 H), 5.56 (dd, *J* = 7, 15 Hz, 1 H), 4.55 (t, *J* = 6 Hz, 1 H), 4.24 (m, 1 H), 3.62 (m, 2 H), 3.38 (br s, 1 H), 3.34 (s, 3 H), 3.33 (s, 3 H), 2.69 (s, 1 H), 2.26 (q, *J* = 7 Hz, 2 H), 1.87 - 1.75 (m, 2 H); <sup>13</sup>C NMR (100 MHz, CDCl<sub>3</sub>) δ 135.3, 128.0, 103.3, 69.3, 61.7, 53.6, 53.3, 39.6,

35.7; IR (neat) 3393, 2931, 2833, 2360, 2340, 1420, 1387, 1191, 1126, 1052, 969  $\text{cm}^{-1}$ ; ESI/APCI-HRMS ( $\text{MNa}^+$ ) calcd for  $\text{C}_9\text{H}_{18}\text{O}_4\text{Na}$  213.1097, found 213.1095;  $[\alpha]_{\text{D}}^{25}$  -8.7 (*c* 2.7,  $\text{CHCl}_3$ ).

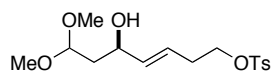

**(*R,E*)- 1, 1-dimethoxy-7-*p*-toluenesulfonyl-4-hepten-3-ol (14).** To a solution of TsCl (4.12 g, 21.6 mmol), DMAP (176 mg, 1.44 mmol), and  $\text{Et}_3\text{N}$  (3.0 mL, 21.6 mmol) in  $\text{CH}_2\text{Cl}_2$  (25 mL) at room temperature was added the diol **S-2** (2.75 g, 14.4 mmol) in  $\text{CH}_2\text{Cl}_2$  (5 mL). After stirring for 2 hours, the reaction mixture was poured onto a mixture of *aq.*  $\text{NaHCO}_3$  and EtOAc. The aqueous layer was extracted with EtOAc (3 x 10 mL). The combined organic layers were washed with brine, dried over anhydrous  $\text{Na}_2\text{SO}_4$ , filtered and concentrated *in vacuo*. The crude product was purified by silica gel chromatography (2 : 1 to 1 : 1  $\text{CH}_2\text{Cl}_2/\text{EtOAc}$ ) affording **14** as a pale yellow oil (3.50 g, 10.2 mmol, 71%);  $^1\text{H}$  NMR (400 MHz,  $\text{CDCl}_3$ )  $\delta$  7.78 (d,  $J = 8$  Hz, 2 H), 7.33 (d,  $J = 8$  Hz, 2 H), 5.63 - 5.54 (m, 2 H), 4.54 (t,  $J = 5$  Hz, 1 H), 4.20 (m, 1 H), 4.04 (t,  $J = 7$  Hz, 2 H), 3.37 (s, 3 H), 3.35 (s, 3 H), 2.84 (br s, 1 H), 2.45 (s, 3 H), 2.38 (q,  $J = 7$  Hz, 2 H), 1.78 (t,  $J = 5$  Hz, 2 H);  $^{13}\text{C}$  NMR (100 MHz,  $\text{CDCl}_3$ )  $\delta$  171.3, 145.0, 136.0, 130.1, 128.1, 124.9, 103.6, 69.7, 69.1, 53.9, 53.4, 39.5, 31.9, 21.8; IR (neat) 3447, 2955, 2832, 1598, 1456, 1359, 1176, 1189, 1123, 1056, 966, 918, 816, 664, 555  $\text{cm}^{-1}$ ; FABHRMS ( $\text{MH}^+$ ) calcd for  $\text{C}_{16}\text{H}_{24}\text{O}_6$   $^{33}\text{S}$  345.1287, found 345.1292;  $[\alpha]_{\text{D}}^{20} = -4.6$  (*c* 1.94,  $\text{CH}_2\text{Cl}_2$ ).

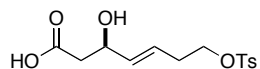

**(*R,E*)-3-hydroxy-7-(tosyloxy)hept-4-enoic acid (S-4)**. To a solution of **14** (2.34 g, 6.79 mmol) in wet CH<sub>3</sub>CN (55 mL, 2% water by volume) at rt was added LiBF<sub>4</sub> (100 mg, 1.07 mmol) as a solution in wet CH<sub>3</sub>CN (3 mL) dropwise. Additional LiBF<sub>4</sub> (100 mg, 1.07 mmol x 19) was added over 10 days. The reaction was quenched by the addition of water, followed by saturated *aq.* NaHCO<sub>3</sub>, diluted with CH<sub>2</sub>Cl<sub>2</sub>, extracted with CH<sub>2</sub>Cl<sub>2</sub>, washed with brine, dried over Na<sub>2</sub>SO<sub>4</sub>, filtered, and concentrated. The crude material was purified by silica gel chromatography (5 : 1 to 1 : 2 hexanes/EtOAc) to provide the corresponding aldehyde **S-3** (2.02 g, 6.77 mmol, 99.7%), which was immediately carried on to the acid. To a solution of the aldehyde (1.77 g, 5.93 mmol) in *t*BuOH (22.5 mL) was added a solution of NaH<sub>2</sub>PO<sub>4</sub> (8.18 g, 59.3 mmol) dissolved in water (7.5 mL). The reaction was cooled to 0 °C and a solution of 2-methyl-2-butene (22 mL, 44 mmol, 2 M in THF) was added, followed by gradual addition of NaClO<sub>2</sub> (2.68 g, 29.6 mmol). The reaction was stirred for 1.5 hours at 0 °C and 2 hours at room temperature. The reaction was cooled to 0 °C and additional NaH<sub>2</sub>PO<sub>4</sub> (4.1 g, 29.7 mmol) and NaClO<sub>2</sub> (1.34 g, 14.8 mmol) were added. The reaction was allowed to warm to rt and stirred 8 hours. The reaction was quenched with 2 M HCl and extracted with CH<sub>2</sub>Cl<sub>2</sub>. The combined extracts were washed with brine, dried over Na<sub>2</sub>SO<sub>4</sub>, and concentrated. Water was removed from the crude product by concentrating from toluene. The crude oil was purified by silica gel chromatography (1 : 1 hexanes/EtOAc + 1% HOAc) to afford the title acid **S-4** (1.24 g, 3.95 mmol, 67%) as a colorless oil; <sup>1</sup>H NMR (400 MHz, CDCl<sub>3</sub>) δ 7.78 (d, *J* = 8 Hz, 2 H), 7.35 (d, *J* = 8 Hz, 2 H), 5.66 - 5.54 (m, 2 H), 4.48 (m, 1



H), 4.37 (br s, 1 H), 4.08 - 4.03 (m, 2 H), 2.55 – 2.30 (m, 4 H), 2.47 (s, 3 H);  $^{13}\text{C}$  NMR (100 MHz,  $\text{CDCl}_3$ )  $\delta$  177.5, 145.1, 145.0, 134.2, 133.2, 130.1, 128.1, 69.5, 68.5, 41.3, 31.8, 21.0; IR (neat) 3508, 2973, 2929, 1732, 1598, 1495, 1358, 1308, 1189, 1176, 1122, 1020, 967, 919, 706, 690, 665, 574, 555  $\text{cm}^{-1}$ ; ESI/APCI-MS ( $\text{M-H}^+$ ) calcd for  $\text{C}_{14}\text{H}_{17}\text{O}_6\text{Si}$  313.07, found 313.13;  $[\alpha]_{\text{D}}^{20} = +2.6$  ( $c$  2.95,  $\text{CH}_2\text{Cl}_2$ ).

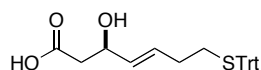

**(*R,E*)-3-hydroxy-7-(tritylthio)hept-4-enoic acid (5).** To a solution of the tosylate **S-4** (1.36 g, 4.32 mmol) in THF (20 mL) at 0 °C was slowly added a mixture of  $\text{HSCPh}_3$  (1.79, 6.48 mmol) and  $\text{KO}^t\text{Bu}$  (1.45 g, 13.0 mmol) in THF (25 mL) via canula. The reaction was stirred for 3 hours at 0 °C. The reaction mixture was acidified to pH 2 by the addition of 2 M HCl and extracted with EtOAc. The combined extracts were filtered through celite and concentrated. The crude product was purified by silica gel chromatography (2 : 1 hexanes/EtOAc + 1% HOAc) to afford **5** (1.75 g, 4.19 mmol, 97%) and matches reported spectroscopic data;  $^1\text{H}$  NMR (300 MHz,  $\text{CDCl}_3$ )  $\delta$  7.39 - 7.17 (m, 15 H), 5.56 (dt,  $J = 7, 15$  Hz, 1 H), 5.40 (dd,  $J = 7, 15$  Hz, 1 H), 4.43 (m, 1 H), 2.62 - 2.41 (m, 2 H), 2.18 (m, 2 H), 2.05 (m, 2H);  $^{13}\text{C}$  NMR (100 MHz,  $\text{CDCl}_3$ )  $\delta$  177.0, 145.0, 131.7, 131.0, 129.8, 128.1, 126.8, 68.7, 66.8, 41.3, 31.6, 31.5; IR (neat) 3056, 2924, 1709, 1490, 1443, 1181, 1034, 972  $\text{cm}^{-1}$ ; ESI/APCI-HRMS ( $\text{MNa}^+$ ) calcd for  $\text{C}_{26}\text{H}_{26}\text{O}_3\text{SNa}$  441.1495, found 441.1498;  $[\alpha]_{\text{D}}^{20} = +6.3$  ( $c$  0.30,  $\text{CHCl}_3$ ).

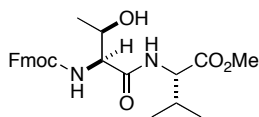

***N*-α-[(fluorenylmethoxy)carbonyl]-L-threonyl-L-valine, methyl ester (15).**<sup>3</sup> To a solution of *N*-Fmoc-L-Thr (8.59 g, 25.2 mmol) and L-Val-OMe HCl (4.22 g, 25.2 mmol) in CH<sub>3</sub>CN (252 mL) was added BOP (16.7 g, 37.8 mmol) and *i*Pr<sub>2</sub>NEt (13.2 mL, 75.5 mmol) at rt. After stirring for 30 min, the mixture was concentrated *in vacuo* to give the crude product. Purification by silica gel chromatography (1 : 1 to 2 : 3 hexanes/EtOAc) afforded compound **15** as an amorphous white powder (10.8 g, 22.9 mmol, 91%), which matches reported characterization data; <sup>1</sup>H NMR (300 MHz, CDCl<sub>3</sub>) δ 7.77 (d, *J* = 7.5 Hz, 2 H) 7.58 (d, *J* = 7.5 Hz, 2 H), 7.40 (t, *J* = 7.5 Hz, 2 H), 7.31 (t, *J* = 7.5 Hz, 2 H), 6.95 (d, *J* = 8.7 Hz, 1 H), 5.81 (d, *J* = 7.8 Hz, 1 H), 4.50 (dd, *J* = 8.7, 4.8 Hz, 1 H), 4.45 - 4.35 (m, 4 H) 4.25 - 4.17 (m, 2 H), 3.74 (s, 3 H), 2.19 (m, 1 H), 1.20 (d, *J* = 6.6 Hz, 3 H), 0.91 (d, *J* = 6.9 Hz, 3 H), 0.88 (d, *J* = 6.9 Hz, 3 H); FABHRMS (MH<sup>+</sup>) calcd for C<sub>25</sub>H<sub>31</sub>N<sub>2</sub>O<sub>6</sub> 455.2182, found 455.2181.

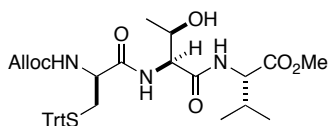

***N*-(Allyloxycarbonyl)-D-Cysteiny-(*S*-triphenylmethyl)-L-threonyl-L-valine methyl ester (16).** A solution of *N*-Fmoc-L-Thr-L-Val-OMe **15** (12.1 g, 26.7 mmol) and Et<sub>2</sub>NH (53.4 mL) in CH<sub>2</sub>Cl<sub>2</sub> (121 mL) was stirred at rt for 4.5 hours. The reaction mixture was concentrated *in vacuo* to give the crude product (14.4 g). The crude amine (14.4 g) was

<sup>3</sup> Li, K. W.; Wu, J; Xing, W.; Simon, J. A. *J. Am. Chem. Soc.* **1996**, *118*, 7237-7238.

dissolved in DMF (20 mL) and CH<sub>2</sub>Cl<sub>2</sub> (120 mL) and treated with *N*-Alloc-S-Trt-D-Cys<sup>4</sup> (12.3 g, 27.5 mmol), HOBt (4.33 g, 32.1 mmol) and EDCI (6.14 g, 32.1 mmol) at 0°C. The reaction mixture was stirred at room temperature for 18 hours. The reaction mixture was concentrated *in vacuo*, poured into water (150 mL) and extracted with EtOAc (200 mL). The organic extract was washed with brine (100 mL), dried over anhydrous Na<sub>2</sub>SO<sub>4</sub>, and concentrated *in vacuo*. The crude product was purified by silica gel chromatography (2 : 1 to 1 : 1 CH<sub>2</sub>Cl<sub>2</sub>/EtOAc) to give compound **16** as an amorphous white solid (11.9 g, 17.9 mmol, 67%); <sup>1</sup>H NMR (400 MHz, CDCl<sub>3</sub>) δ 7.44 - 7.40 (m, 6 H), 7.33 - 7.20 (m, 10 H), 7.08 (br d, *J* = 9 Hz, 1 H), 6.80 (br d, *J* = 7 Hz, 1 H), 5.85 (ddt, *J* = 5, 11, 17 Hz, 1 H), 5.29 (d, *J* = 17 Hz, 1 H), 5.22 (d, *J* = 11 Hz, 1 H), 5.09 (d, *J* = 7 Hz, 1 H), 4.51 (d, *J* = 6 Hz, 2 H), 4.43 (dd, *J* = 2, 8 Hz, 1 H), 4.35 (m, 1 H), 4.29 (dd, *J* = 2, 8 Hz, 1 H), 3.80 (m, 1 H), 3.73 (s, 3 H), 2.76 (dd, *J* = 7, 13 Hz, 1 H), 2.58 (dd, *J* = 6, 13 Hz, 1 H), 2.15 (m, 1 H), 1.09 (d, *J* = 6 Hz, 3 H), 0.86 (d, *J* = 7 Hz, 3 H), 0.84 (d, *J* = 7 Hz, 3 H); <sup>13</sup>C NMR (100 MHz, CDCl<sub>3</sub>) δ 172.1, 171.5, 171.0, 144.4, 132.5, 129.7, 128.3, 127.2, 118.3, 67.6, 66.3, 66.2, 57.5, 56.8, 54.3, 52.4, 34.0, 30.9, 19.3, 18.2, 17.8; IR (neat) 3289, 3059, 2966, 1733, 1647, 1444, 1213, 733, 700, 503 cm<sup>-1</sup>; FABHRMS (M-H<sup>+</sup>) calcd for C<sub>36</sub>H<sub>42</sub>N<sub>3</sub>O<sub>7</sub>S 660.2743, found 660.2741; Anal. calcd C: 65.33; H: 6.55; N: 6.35; S: 4.85. Obs, C: 64.98; H: 6.60; N: 6.54; S: 5.13; [α]<sub>D</sub><sup>20</sup> = -50.0 (*c* 0.68, CHCl<sub>3</sub>).

---

<sup>4</sup> Kruse, C. H.; Holden, K. G. *J. Org. Chem.* **1985**, *65*, 1192-1194.

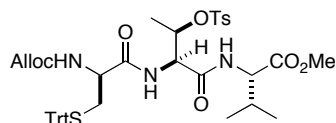

***N*-(Allyloxycarbonyl)-D-Cysteiny-(*S*-triphenylmethyl)-L-threonyl-(*O-p*-**

**toluenesulfonyl)-L-valine methyl ester (S-5).** To a solution of *N*-Alloc-*S*-Trt-*D*-Cys-*L*-

Thr-*L*-Val-OMe **16** (11.5 g, 17.3 mmol) in pyridine (86 mL) was added tosylanhydride

(17.0 g, 52.0 mmol) at 0°C. The mixture was stirred at 0 °C for 40 min. The resulting

solution was quenched with saturated *aq.* NaHCO<sub>3</sub> (200 mL) and extracted with EtOAc

(250 mL). The combined extracts were washed with aqueous 1 M HCl (150 mL x 6),

brine (150 mL), dried over anhydrous Na<sub>2</sub>SO<sub>4</sub>, and concentrated *in vacuo* to give the

crude product. The crude product was purified by silica gel chromatography (2 : 1 to 3 :

2 hexanes/EtOAc) to give compound **S-5** as a white powder (13.4 g, 16.5 mmol, 95%);

<sup>1</sup>H NMR (400 MHz, CDCl<sub>3</sub>) δ 7.81 (d, *J* = 8 Hz, 2 H), 7.45 - 7.21 (m, 17 H), 6.86 (d, *J* = 8

Hz, 1 H), 6.62 (d, *J* = 8 Hz, 1 H), 5.88 (ddt, *J* = 5, 11, 17 Hz, 1 H), 5.28 (d, *J* = 17 Hz, 1

H), 5.21 (d, *J* = 11 Hz, 1 H), 5.14 (m, 1 H), 5.00 (d, *J* = 5 Hz, 1 H), 4.54 (dd, *J* = 4, 8 Hz,

1 H), 4.50 (m, 2 H), 4.31 (dd, *J* = 6, 8 Hz, 1 H), 3.69 (s, 3 H), 3.54 (m, 1 H), 2.77 (dd, *J* =

7, 13 Hz, 1 H), 2.62 (dd, *J* = 6, 13 Hz, 1 H), 2.45 (s, 3 H), 2.10 (m, 1H), 1.19 (d, *J* = 6

Hz, 3 H), 0.87 (d, *J* = 7 Hz, 6 H); <sup>13</sup>C NMR (100 MHz, CDCl<sub>3</sub>) δ 171.7, 170.8, 167.5,

156.0, 145.3, 144.4, 133.5, 132.5, 130.1, 129.7, 128.4, 128.3, 127.2, 118.3, 67.6, 66.4,

58.0, 56.5, 54.4, 52.3, 33.4, 30.8, 21.9, 19.1, 18.2, 17.3; FABHRMS (MH<sup>+</sup>) calcd for

C<sub>43</sub>H<sub>50</sub>N<sub>3</sub>O<sub>9</sub>S<sub>2</sub> 816.2988, found 816.2987; Anal. calcd C: 63.29; H: 6.05; N: 5.15; S: 7.86.

Obs. C: 63.36; H: 6.39; N: 5.40; S: 7.65; [α]<sub>D</sub><sup>20</sup> = +5.1 (*c* 0.70, CHCl<sub>3</sub>).

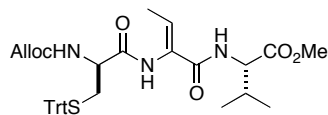

***N*-(Allyloxycarbonyl)-*D*-Cysteinyl-(*S*-triphenylmethyl)-(*Z*)-dehydrobutyrinyl-*L*-**

**valine methyl ester (17).** To a solution of *N*-Alloc-*S*-Trt-*D*-Cys-*L*-Thr(*O*-Ts)-*L*-Val-OMe

**S-5** (12.5 g, 15.3 mmol) in CH<sub>3</sub>CN (306 mL) was added DABCO (17.2 g, 153 mmol) at

rt. After stirring for 18 hours, the mixture was concentrated and rediluted with EtOAc

and 1 M aqueous HCl (200 mL). The aqueous layer was extracted with EtOAc. The

combined extracts were washed with brine (100 mL), dried over anhydrous Na<sub>2</sub>SO<sub>4</sub>, and

concentrated *in vacuo* to give the crude product. The crude product was purified by

silica gel chromatography (2 : 1 hexanes/EtOAc) to give compound **17** as a white

powder (9.84 g, 153 mmol, quant.); <sup>1</sup>H NMR (400 MHz, CDCl<sub>3</sub>) δ 7.49 - 7.22 (m, 15 H),

7.04 (br s, 1 H), 6.77 (br q, *J* = 7 Hz, 1 H), 6.71 (br d, *J* = 7 Hz, 1 H), 5.90 (ddt, *J* = 5, 11,

17 Hz, 1 H), 5.31 (d, *J* = 17 Hz, 1 H), 5.24 (d, *J* = 17 Hz, 1 H), 5.02 (br s, 1 H), 4.55 (d, *J*

= 5 Hz, 2 H), 4.50 (dd, *J* = 6, 8 Hz, 1 H), 3.73 (q, *J* = 6 Hz, 1 H), 3.68 (s, 3 H), 2.80 (dd,

*J* = 7 Hz, 13 Hz, 1 H), 2.71 (dd, *J* = 7 Hz, 14 Hz, 1 H), 2.11 (m, 1 H), 1.69 (d, *J* = 7 Hz, 3

H), 0.91 (d, *J* = 7 Hz, 3 H), 0.89 (d, *J* = 7 Hz, 3 H); <sup>13</sup>C NMR (100 MHz, CDCl<sub>3</sub>) δ 172.6,

169.2, 164.0, 156.5, 144.3, 133.0, 132.4, 129.7, 128.6, 128.4, 127.3, 118.6, 67.8, 66.6,

58.0, 54.8, 52.2, 33.2, 31.2, 19.2, 18.4, 13.9; IR (neat) 3278, 3083, 2964, 2875, 1740,

1700, 1518, 1444, 1245, 1185, 1149, 1035, 912, 733, 701 cm<sup>-1</sup>; FABHRMS (MH<sup>+</sup>) calcd

for C<sub>36</sub>H<sub>42</sub>N<sub>3</sub>O<sub>6</sub>S 644.2794, found 644.2778; Anal. calcd C: 67.16; H: 6.42; N: 6.53; S:

4.98. Obs. C: 66.77; H: 6.76; N: 6.74; S 5.34; [α]<sub>D</sub><sup>20</sup> = +7.1 (*c* 0.80, CHCl<sub>3</sub>).

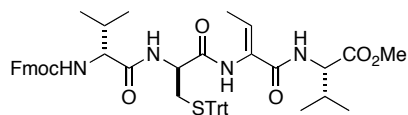

***N*-α-[(Fluorenylmethoxy)carbonyl]-D-Valyl-D-Cysteinyl-(*S*-triphenylmethyl)-(Z)-dehydrobutyrinyl-L-valine methyl ester (18).** To a mixture of *N*-Alloc-tripeptide **17** (9.16 g, 14.2 mmol), PdCl<sub>2</sub>(PPh<sub>3</sub>)<sub>2</sub> (200 mg, 0.29 mmol) and AcOH (1.95 mL, 34.2 mmol) in CH<sub>2</sub>Cl<sub>2</sub> (142 mL) was added SnBu<sub>3</sub>H (4.15 mL, 15.7 mmol) at rt. After stirring for 3 hours, saturated *aq.* NaHCO<sub>3</sub> (100 mL) was added, and the mixture was extracted with CH<sub>2</sub>Cl<sub>2</sub> (100 mL). The combined organic layers were washed with brine, dried over anhydrous Na<sub>2</sub>SO<sub>4</sub> and concentrated *in vacuo* to give crude amide (14.2 g). The crude amine was dissolved in DMF (20 mL) and CH<sub>2</sub>Cl<sub>2</sub> (142 mL), and then treated with *N*-Fmoc-D-Valine (5.29 g, 15.6 mmol), HOBT (2.31 g, 17.1 mmol), and EDCI (3.27 g, 17.1 mmol) at 0 °C. The reaction mixture was stirred at room temperature for 19 hours and then concentrated *in vacuo*. The residue was diluted with water (100 mL), and extracted with EtOAc (100 mL). The combined organic layers were washed with brine (50 mL), dried over anhydrous Na<sub>2</sub>SO<sub>4</sub>, and concentrated *in vacuo*. The crude product was purified by silica gel chromatography (1 : 1 to 1 : 2 hexanes/EtOAc) to give compound **18**. This solid was washed with Et<sub>2</sub>O – hexanes to remove the Bu<sub>3</sub>SnH residue, and dried under vacuum to give **18** as a white powder (10.4 g, 11.8 mmol, 83% from **17**); <sup>1</sup>H NMR (400 MHz, CDCl<sub>3</sub>) δ 7.78 (d, *J* = 7 Hz, 2 H), 7.54 (d, *J* = 7 Hz, 2 H), 7.48 - 7.15 (m, 20 H), 6.85 (m, 2 H), 6.27 (br s, 1 H), 5.29 (br s, 1 H), 4.52 (dd, *J* = 6, 8 Hz, 1 H), 4.43 (dd, *J* = 7, 11 Hz, 1 H), 4.26 (dd, *J* = 7, 10 Hz, 1 H), 4.12 (m, 1 H), 4.02 - 3.95 (m, 2 H), 3.67 (s, 3 H), 2.94 (dd, *J* = 6, 13 Hz, 1 H), 2.61 (dd, *J* = 6, 13 Hz, 1 H),

2.19 - 2.07 (m, 2 H), 1.74 (d,  $J = 7$  Hz, 3 H), 1.00 - 0.84 (m, 12 H);  $^{13}\text{C}$  NMR (100 MHz,  $\text{CDCl}_3$ )  $\delta$  172.6, 172.0, 168.7, 164.1, 157.0, 144.3, 143.9, 141.5, 132.5, 129.6, 128.8, 128.3, 128.0, 127.2, 125.2, 125.1, 120.2, 67.4, 60.7, 58.0, 53.3, 52.1, 47.3, 32.8, 31.3, 30.7, 19.5, 19.2, 18.4, 17.8, 13.8; IR (neat) 3293, 360, 2963, 2875, 1740, 1645, 1506, 1448, 1244, 910, 738, 701  $\text{cm}^{-1}$ ; FABHRMS ( $\text{MH}^+$ ) calcd for  $\text{C}_{52}\text{H}_{57}\text{N}_4\text{O}_7\text{S}$  881.3948, found 881.3972; Anal. calcd C: 70.88; H: 6.41; N: 6.36; S: 3.64. Obs. C: 70.92; H: 6.80; N: 6.45; S: 4.02;  $[\alpha]_D^{20} = -3.6$  ( $c$  1.0,  $\text{CH}_2\text{Cl}_2$ ).

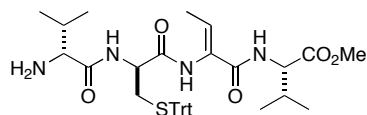

***D*-Valyl-*D*-Cysteinyl-(*S*-triphenylmethyl)-(*Z*)-dehydrobutyrinyl-*L*-valine methyl ester (**4**).**<sup>2</sup> To a solution of Fmoc-tetrapeptide **18** (800 mg, 0.91 mmol) in anhydrous  $\text{CH}_3\text{CN}$  (36 mL) at 0 °C was added  $\text{Et}_2\text{NH}$  (470  $\mu\text{L}$ , 4.54 mmol). The mixture was warmed to rt and stirred for 2 h. The resulting solution was concentrated and purified by silica gel chromatography (30 : 1,  $\text{CH}_2\text{Cl}_2/\text{MeOH}$ ) to afford **4** (595 mg, 0.91 mmol, quant.), which matched the reported spectroscopic data.  $^1\text{H}$  NMR (400 MHz,  $\text{CDCl}_3$ )  $\delta$  7.79 (d,  $J = 7$  Hz, 1 H), 7.51 (s, 1 H), 7.42 - 7.17 (m, 15 H), 6.69 (q,  $J = 7$  Hz, 1 H), 6.67 (d,  $J = 8$  Hz, 1 H), 4.46 (dd,  $J = 6, 8$  Hz, 1 H), 3.75 (q,  $J = 7$  Hz, 1 H), 3.63 (s, 3 H), 3.23 (d,  $J = 4$  Hz, 1 H), 2.76 (dd,  $J = 7, 13$  Hz, 1 H), 2.61 (dd,  $J = 7, 13$  Hz, 1 H), 2.15 (m, 1 H), 2.07 (m, 1 H), 1.63 (d,  $J = 7$  Hz, 3 H), 0.92 (d,  $J = 7$  Hz, 3 H), 0.86 (d,  $J = 7$  Hz, 3 H), 0.85 (d,  $J = 7$  Hz, 3 H), 0.76 (d,  $J = 7$  Hz, 3 H);  $^{13}\text{C}$  NMR (100 MHz,  $\text{CDCl}_3$ )  $\delta$  176.0, 172.7, 169.1, 164.0, 144.5, 132.6, 129.7, 128.6, 128.3, 127.1, 67.4, 60.0, 57.8, 53.0,

52.1, 32.4, 31.3, 30.9, 19.7, 19.1, 18.4, 16.5, 13.8; IR (neat) 3310, 3057, 2962, 2873, 1741, 1647, 1496, 1444, 1372, 1267, 1207, 742, 701, 671  $\text{cm}^{-1}$ ; ESI/APCI-HRMS ( $\text{MH}^+$ ) calcd for  $\text{C}_{37}\text{H}_{47}\text{N}_4\text{O}_5\text{S}$ : 659.3262, found 659.3254;  $[\alpha]_{\text{D}}^{20} = +40.6$  ( $c$  1.0,  $\text{CH}_2\text{Cl}_2$ ).

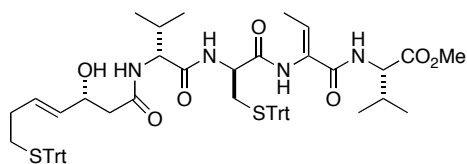

**Pentapeptide (19).**<sup>2</sup> To a mixture of tetrapeptide **4** (3.34 g, 5.02 mmol) and acid **5** (1.67 g, 3.99 mmol) in  $\text{CH}_3\text{CN}$  (40 mL) and  $\text{CH}_2\text{Cl}_2$  (10 mL) maintained at rt by a water bath was added BOP (3.71 g, 8.38 mmol) and  $i\text{Pr}_2\text{NEt}_2$  (2.9 mL, 16.8 mmol). The reaction was stirred at rt for 15 hours. The resulting solution was quenched with *aq.* citric acid and extracted with EtOAc. The combined organic layers were washed with  $\text{NaHCO}_3$ , brine, dried over  $\text{Na}_2\text{SO}_4$ , filtered, and concentrated. The crude product was purified by silica gel chromatography (1 : 1 to 1 : 4, hexanes/EtOAc) to afford **19** (4.23 g, 3.99 mmol, quant.);  $^1\text{H}$  NMR (400 MHz,  $\text{CDCl}_3$ )  $\delta$  7.52 (s, 1 H), 7.43 - 7.12 (m, 30 H), 6.80 (d,  $J = 8$  Hz, 1 H), 6.75 - 6.69 (m, 2 H) 6.64 (q,  $J = 7$  Hz, 1 H), 5.49 (dt,  $J = 6, 15$  Hz, 1 H), 5.34 (dd,  $J = 5, 15$  Hz, 1 H), 4.45 (dd,  $J = 8.3, 6.1$  Hz, 1 H), 4.33 (s, 1 H), 4.09 (t,  $J = 6.2$  Hz, 1 H), 3.92 (m, 1 H), 3.64 (s, 3 H), 3.30 (d,  $J = 4.0$  Hz, 1 H), 2.80 (dd,  $J = 7.0, 13.0$  Hz, 1 H), 2.62 (dd,  $J = 6.0, 13.0$  Hz, 1 H), 2.40 (dd,  $J = 3, 15$  Hz, 1 H), 2.28 (dd,  $J = 9, 15$  Hz, 1 H), 2.20 - 2.10 (m, 6 H), 1.68 (d,  $J = 6$  Hz, 3 H), 0.94 - 0.81 (m, 12 H);  $^{13}\text{C}$  NMR (100 MHz,  $\text{CDCl}_3$ )  $\delta$  173.0, 172.0, 169.4, 164.4, 144.9, 144.3, 132.33, 132.30, 129.6, 129.5, 128.9, 128.3, 127.1, 126.8, 69.5, 67.5, 66.7, 59.6, 58.2, 53.3, 52.2, 42.9, 32.7, 31.52, 31.45, 31.1, 30.2, 19.5, 19.2, 18.5, 18.0, 13.7; IR (neat) 3395, 3294, 3057, 2963,



2930, 1738, 1640, 1522, 1491, 1443, 848, 742, 700, 669  $\text{cm}^{-1}$ ; FABHRMS ( $\text{MNa}^+$ ) calcd for  $\text{C}_{63}\text{H}_{70}\text{N}_4\text{O}_7\text{S}_2\text{Na}$  1081.4584, found 1081.4617;  $[\alpha]_{\text{D}}^{20} = -2.6$  ( $c$  1.0,  $\text{CH}_2\text{Cl}_2$ ).

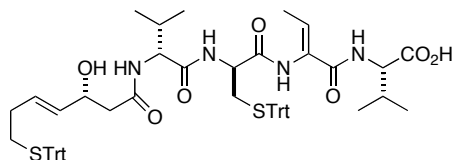

**Hydroxyacid pentapeptide (S-6).** To a solution of ester **19** (2.16 g, 2.04 mmol) in THF (4 mL) under argon at 0 °C was added a solution of  $\text{LiOH}\cdot\text{H}_2\text{O}$  (146 mg, 6.13 mmol) in  $\text{H}_2\text{O}$  (1 mL). After stirring for 2 hours at 0 °C, the reaction was poured into a mixture of EtOAc (25 mL) and 2N HCl (5 mL). The aqueous layer was extracted with EtOAc, the combined organic layers were washed with brine, filtered through cotton, and concentrated. The crude oil was purified by silica gel chromatography (1 : 1 to 1 : 8 hexanes/EtOAc + 1% HOAc). Excess HOAc was azeotropically removed by concentrating from toluene. The product was further purified by recrystallization from hexanes/EtOAc to provide **S-6** (1.56 g, 1.49 mmol, 73%) as an off-white powder that is consistent with reported spectroscopic data;  $^1\text{H}$  NMR (400 MHz,  $\text{CDCl}_3$ )  $\delta$  7.37 (m, 34 H), 6.66 (q,  $J = 7$  Hz, 1 H), 5.44 (dt,  $J = 7, 15$  Hz, 1 H), 5.32 (dd,  $J = 7, 15$  Hz, 1 H), 4.38 - 4.25 (m, 2 H), 4.08 (d,  $J = 6$  Hz, 1 H), 3.91 (t,  $J = 7$  Hz, 1 H), 2.35 - 2.23 (m, 2 H), 2.15 - 1.98 (m, 4 H), 1.64 (d,  $J = 7$  Hz, 3 H), 0.88 - 0.78 (m, 12 H);  $^{13}\text{C}$  NMR (100 MHz,  $\text{CDCl}_3$ )  $\delta$  173.1, 172.3, 170.9, 169.7, 164.8, 144.8, 144.2, 132.5, 129.5, 128.5, 128.2, 128.1, 127.9, 127.0, 126.6, 69.0, 67.2, 66.6, 58.1, 53.2, 53.1, 42.8, 32.5, 31.5, 31.2, 30.6, 30.3, 21.4, 19.2, 19.0, 18.1, 17.6, 13.5; IR (neat) 3304, 3056, 2964, 2928, 2875,

1717, 1445, 419, 1393, 1265, 1034, 847, 781, 701  $\text{cm}^{-1}$ ; ESI/APCI-HRMS ( $\text{MNa}^+$ ) calcd for  $\text{C}_{62}\text{H}_{68}\text{N}_4\text{O}_7\text{S}_2\text{Na}$  1067.4422, found 1067.4398;  $[\alpha]_{\text{D}}^{20} = +6.8$  ( $c$  1.0,  $\text{CH}_2\text{Cl}_2$ ).

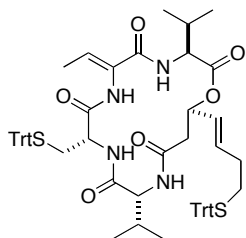

**Depsipeptide (3).**<sup>3</sup> To a solution of  $\text{PPh}_3$  (188 mg, 0.72 mmol) in THF (25 mL) was added *p*-TsOH (27.0 mg, 0.14 mmol) and DIAD (113  $\mu\text{L}$ , 0.57 mol) at rt. The mixture was stirred at rt for 20 min and then cooled to 0  $^\circ\text{C}$ . To the resulting solution at 0  $^\circ\text{C}$  was added acid **S-6** (30 mg, 0.028 mmol) in THF (5 mL) dropwise via syringe pump over 2 h. The mixture was then stirred an additional 2 h at 0  $^\circ\text{C}$  and concentrated. Purification by silica gel chromatography (2 : 1 to 1 : 1 to 1 : 2 to 1 : 4, hexanes/EtOAc) afforded depsipeptide **3** as a colorless oil (7.0 mg, 0.0068 mmol, 24%);  $^1\text{H}$  NMR (400 MHz,  $\text{CDCl}_3$  :  $\text{CD}_3\text{OD}$ , 10 : 1)  $\delta$  7.75 (d,  $J = 7$  Hz, 1H), 7.72 (d,  $J = 7$  Hz, 1 H), 7.39 - 7.05 (m, 32 H), 6.79 (q,  $J = 7$  Hz, 1 H), 5.53 (dt,  $J = 15$  Hz, 7 Hz, 1 H), 5.45 - 5.40 (m, 1 H), 5.23 (dd,  $J = 15$  Hz, 7 Hz, 1 H), 4.51 (d,  $J = 5$  Hz, 1 H), 4.18 - 4.12 (m, 1 H), 3.93 - 3.83 (m, 1 H), 2.57 - 2.38 (m, 1 H), 2.31 - 2.23 (m, 4 H), 2.20 - 2.10 (m, 2 H), 2.02 - 1.91 (m, 2 H), 1.93 - 1.83 (m, 1 H), 1.64 (d,  $J = 7$  Hz, 3 H), 0.92 (d,  $J = 7$  Hz, 3 H), 0.88 (d,  $J = 7$  Hz, 3 H), 0.85 - 0.77 (m, 6 H); ESI/APCI-HRMS ( $\text{MH}^+$ ) calcd for  $\text{C}_{62}\text{H}_{67}\text{N}_4\text{O}_6\text{S}_2$  1027.4502, found 1027.4487.

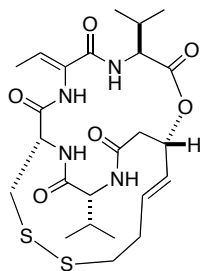

**FK228 (1).**<sup>3</sup> To a solution of  $I_2$  (14.8 mg, 0.058 mmol) in MeOH (19 mL) at rt was added depsipeptide **3** (20.0 mg, 0.019 mmol). The mixture was stirred at rt for 10 min. The resulting solution was quenched with 0.2 M aqueous citrate/ 0.2 M aqueous ascorbate pH 4 buffer (10 mL). The mixture was poured onto brine and extracted with  $CH_2Cl_2$ . The combined extracts were dried ( $Na_2SO_4$ ) and concentrated. Purification by silica gel chromatography (1 : 20, MeOH/ $CH_2Cl_2$ ) afforded FK228 **1** as a thin film (8.5 mg, 0.016 mmol, 81%);  $^1H$  NMR (400 MHz,  $CDCl_3$  :  $CD_3OD$ , 10 : 1)  $\delta$  8.00 (br s, 1 H), 7.73 (d,  $J = 7$  Hz, 1 H), 7.53 (d,  $J = 8$  Hz, 1 H), 6.30 (q,  $J = 7$  Hz, 1 H), 5.76 - 5.60 (m, 3 H), 4.67 (dt,  $J = 7, 10$  Hz, 1 H), 4.49 (dd,  $J = 4, 8$  Hz, 1 H), 3.94 (m, 1 H), 3.36 (d,  $J = 2$  Hz, 1 H), 3.14 - 3.04 (m, 3 H), 2.94 - 2.87 (m, 1 H), 2.74 - 2.56 (m, 4 H), 2.36 - 2.29 (m, 1 H), 2.20 - 2.13 (m, 1 H), 1.68 (d,  $J = 7$  Hz, 3 H), 1.06 (d,  $J = 7$  Hz, 3 H), 1.04 (d,  $J = 7$  Hz, 3 H), 0.97 (d,  $J = 7$  Hz, 3 H), 0.94 (d,  $J = 7$  Hz, 3 H); ESI/APCI-MS ( $MNa^+$ ) calcd for  $C_{24}H_{36}N_4O_6S_2Na$  563.40, found 563.40.

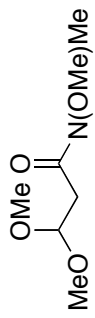

9

400 MHz, CDCl<sub>3</sub>

S20

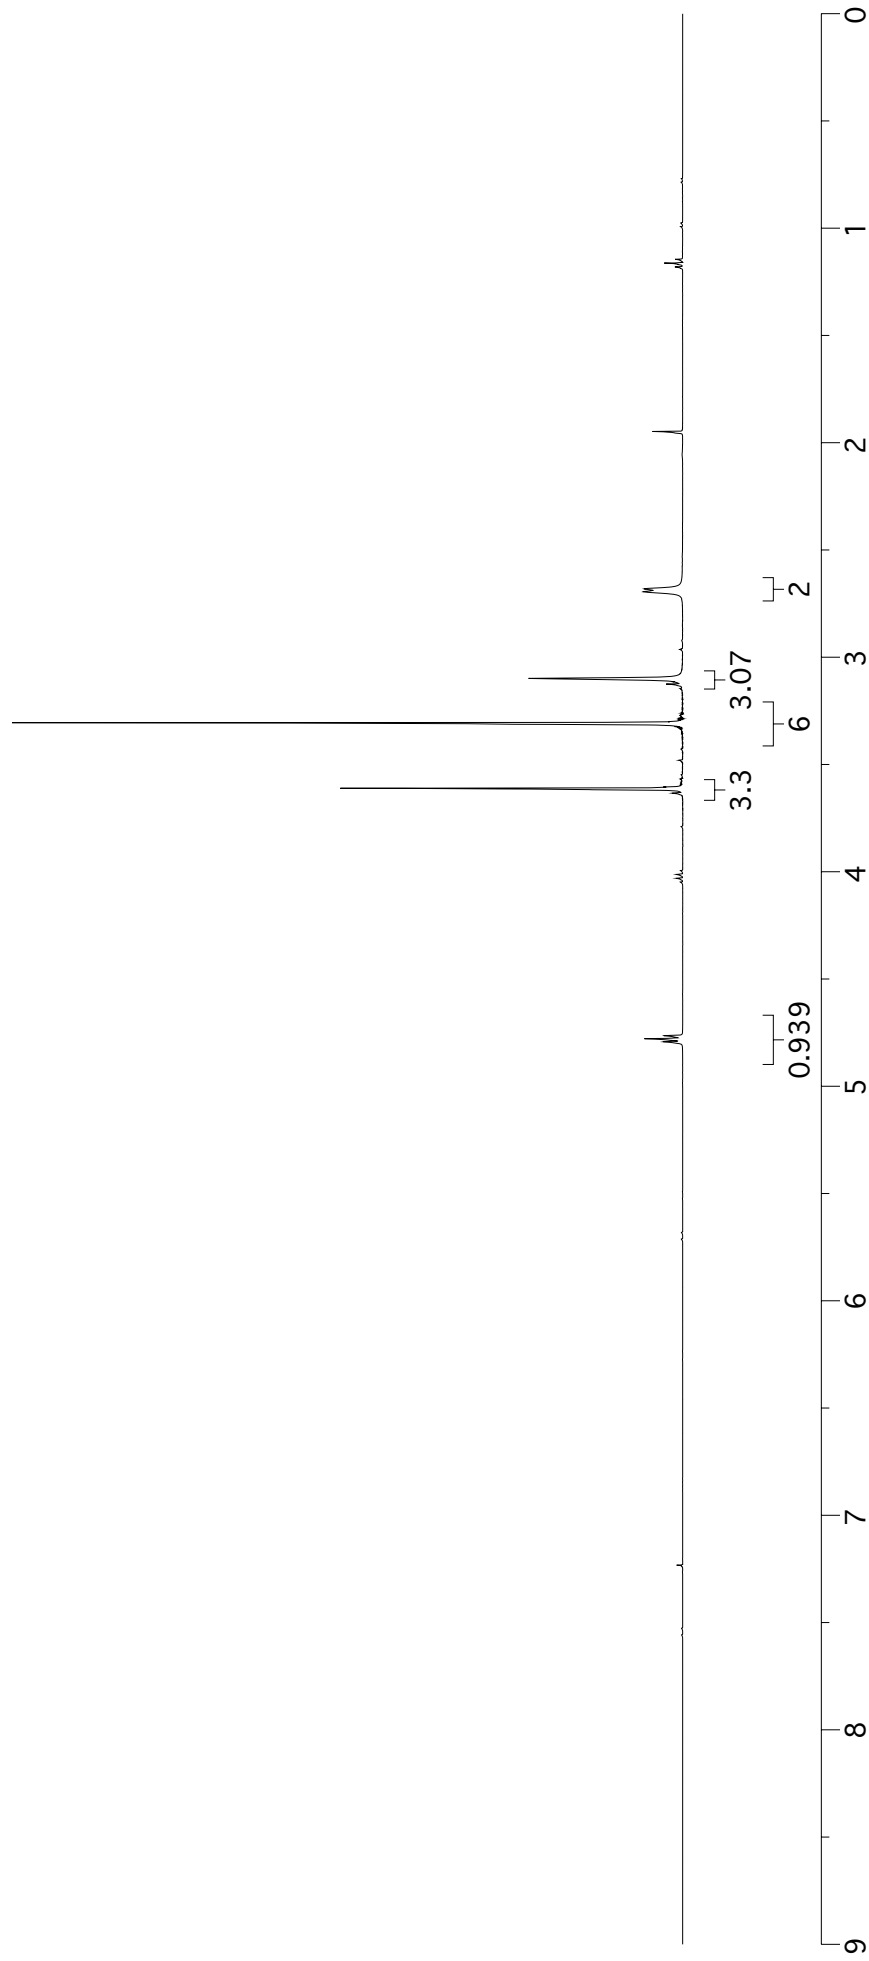

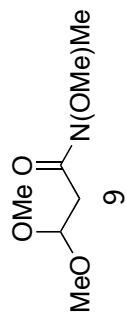100 MHz, CDCl<sub>3</sub>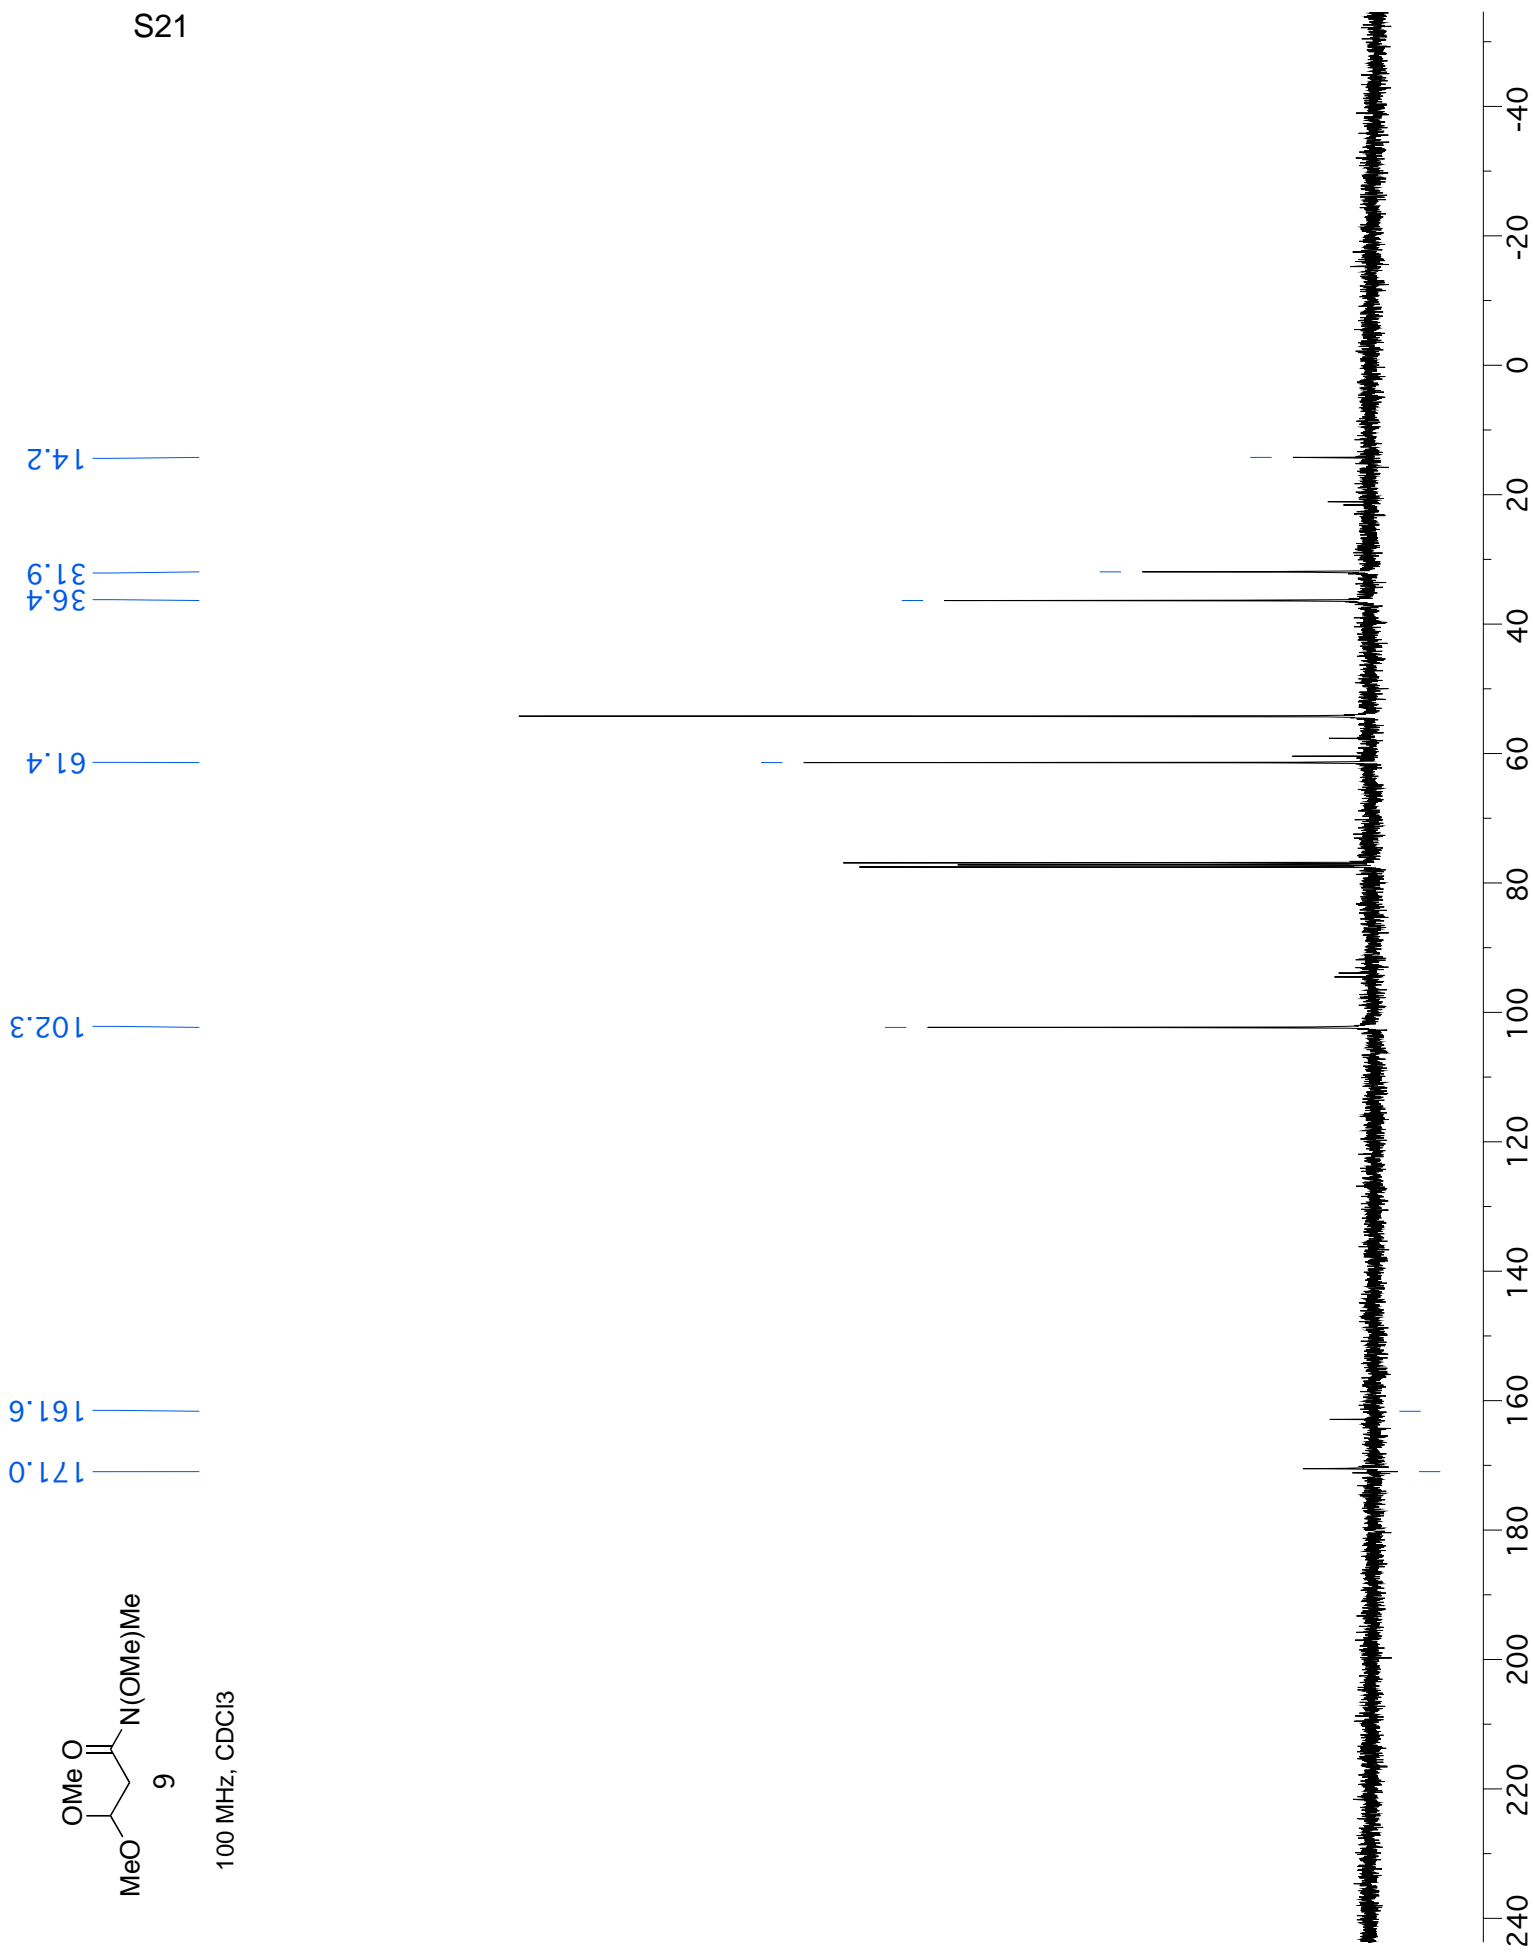

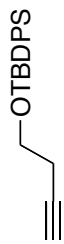

10

400 MHz, CDCl<sub>3</sub>

S22

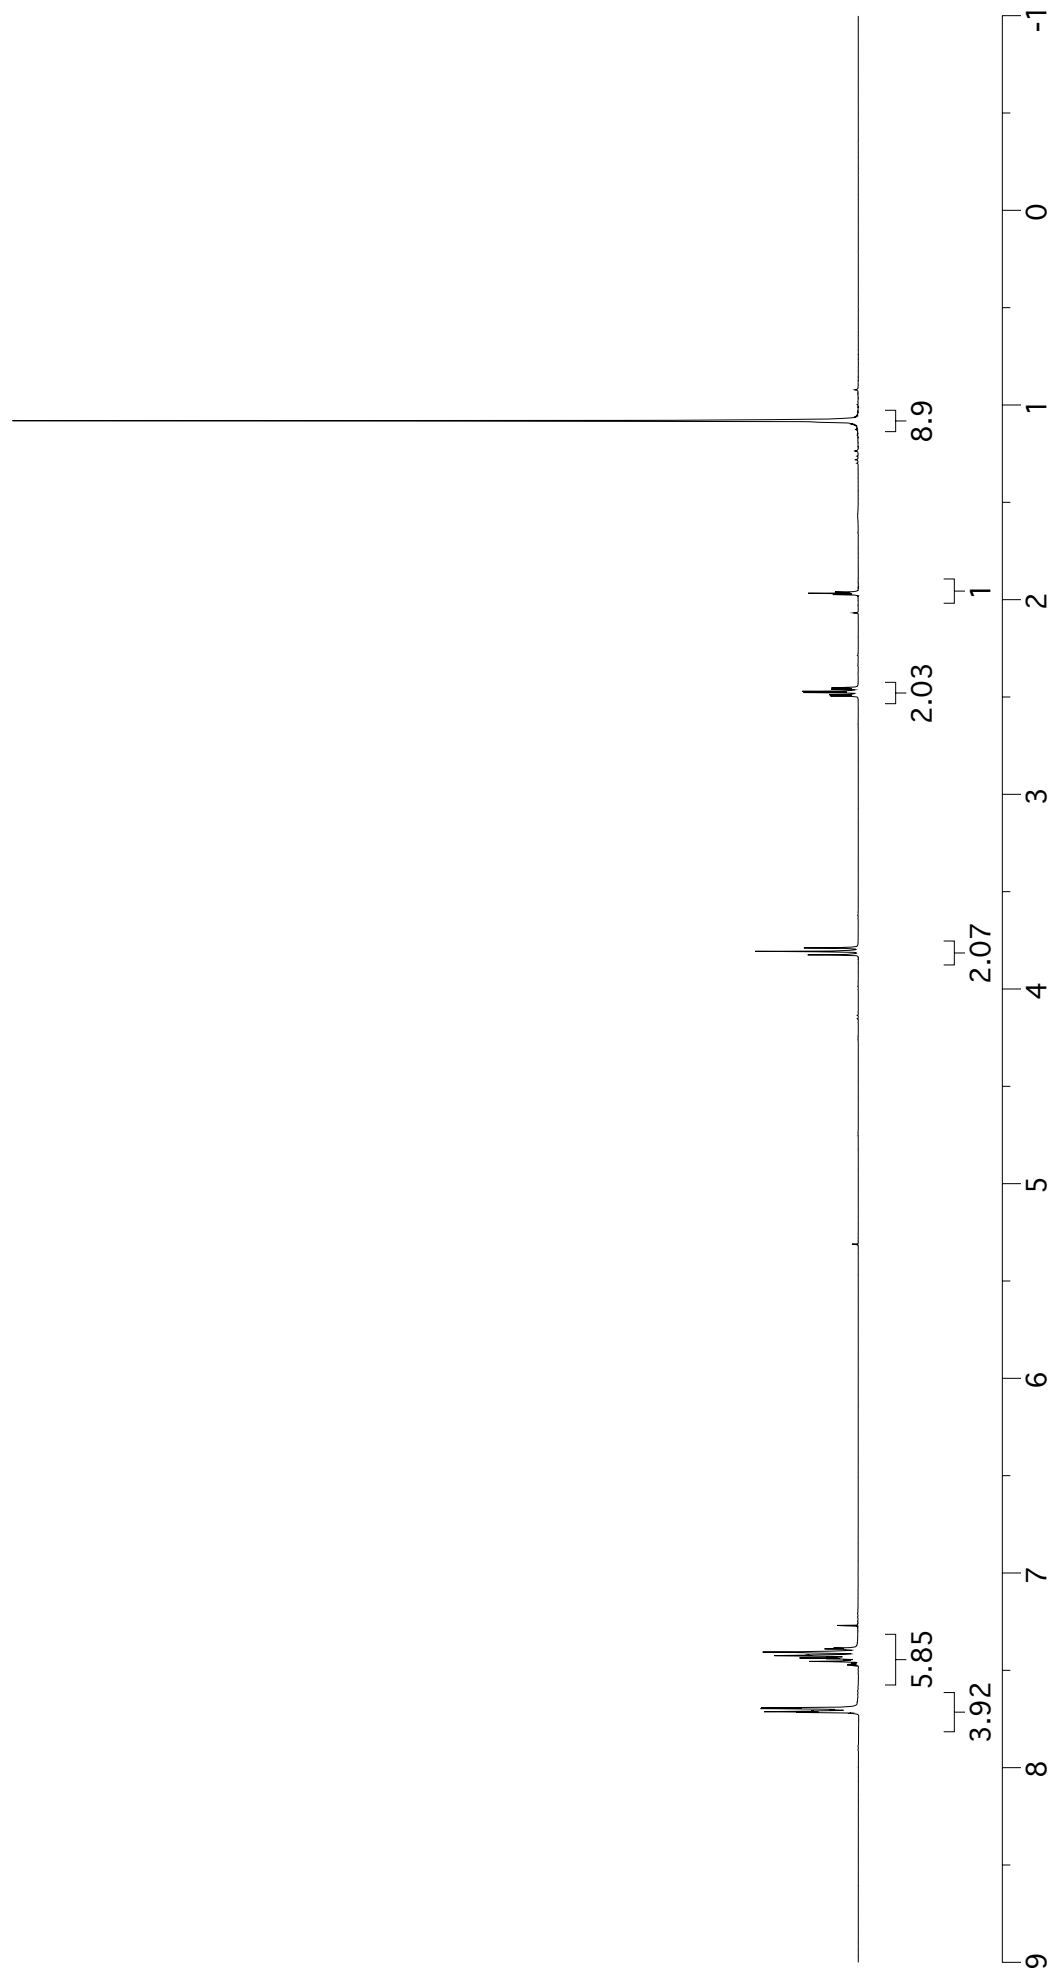

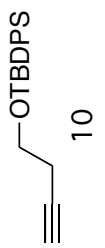

100 MHz, CDCl<sub>3</sub>

S23

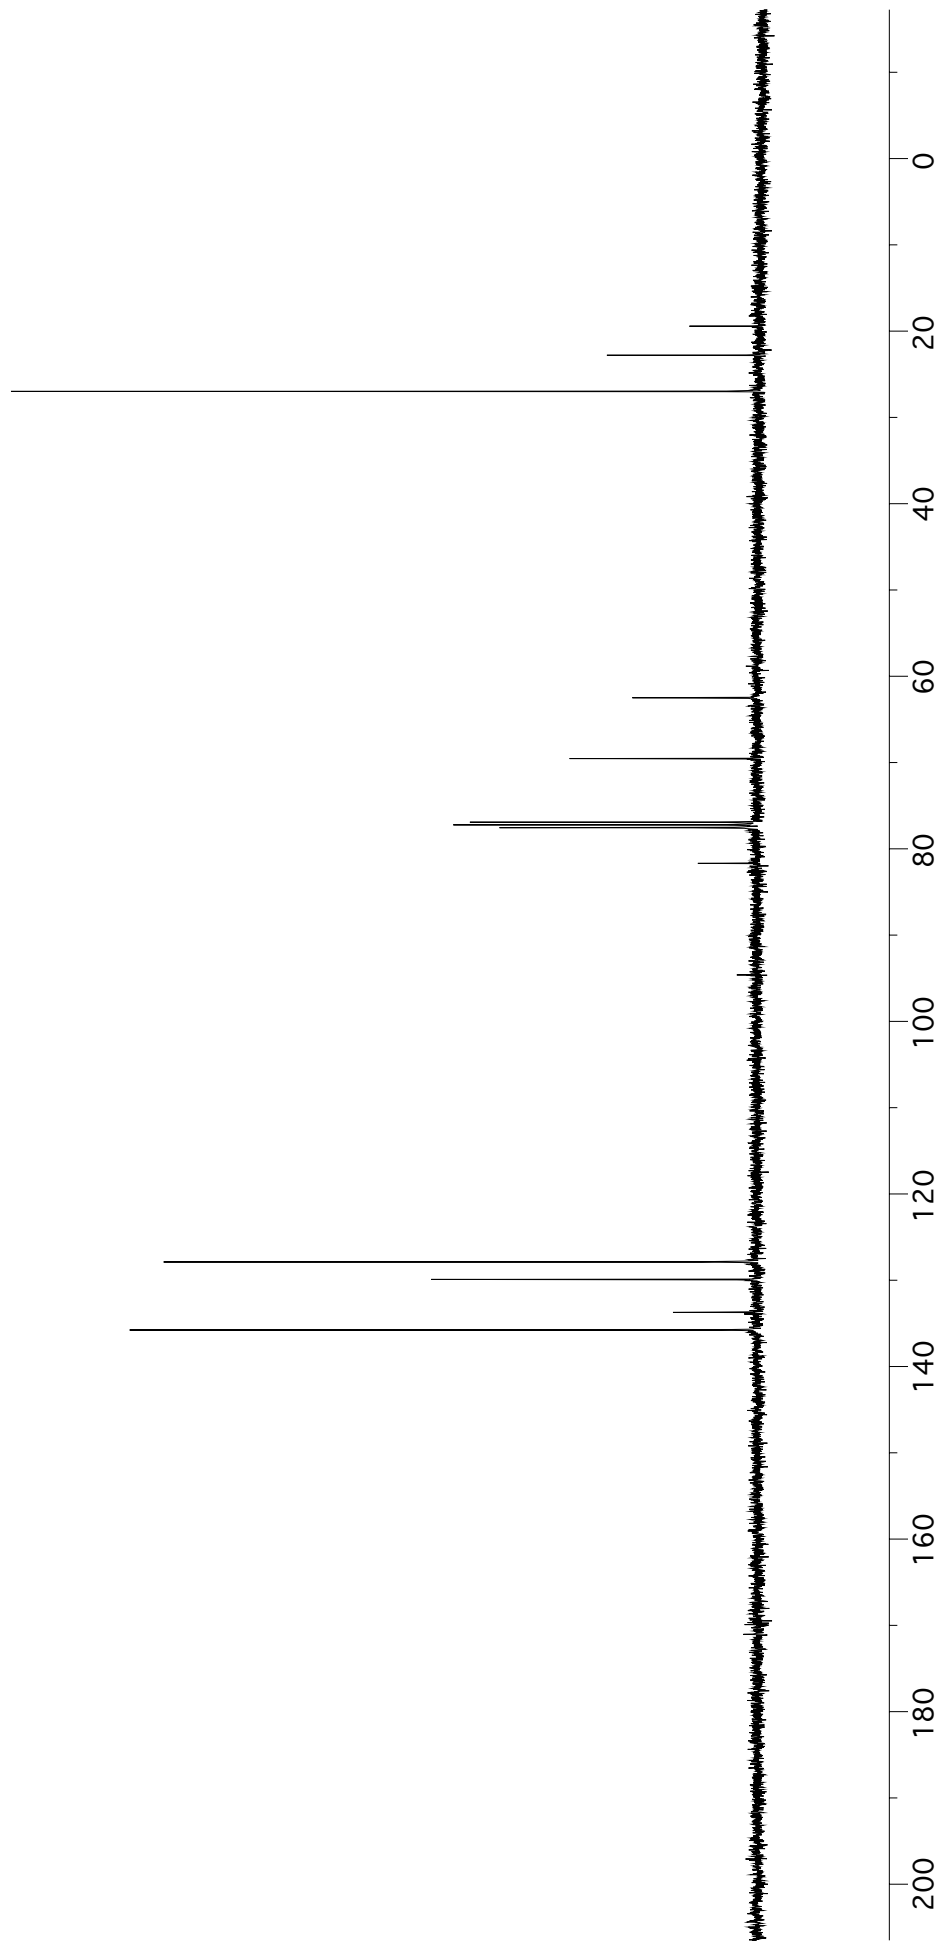

S24

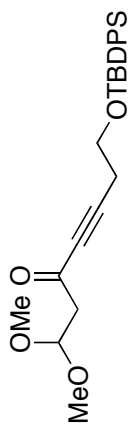

400 MHz, CDCl<sub>3</sub>

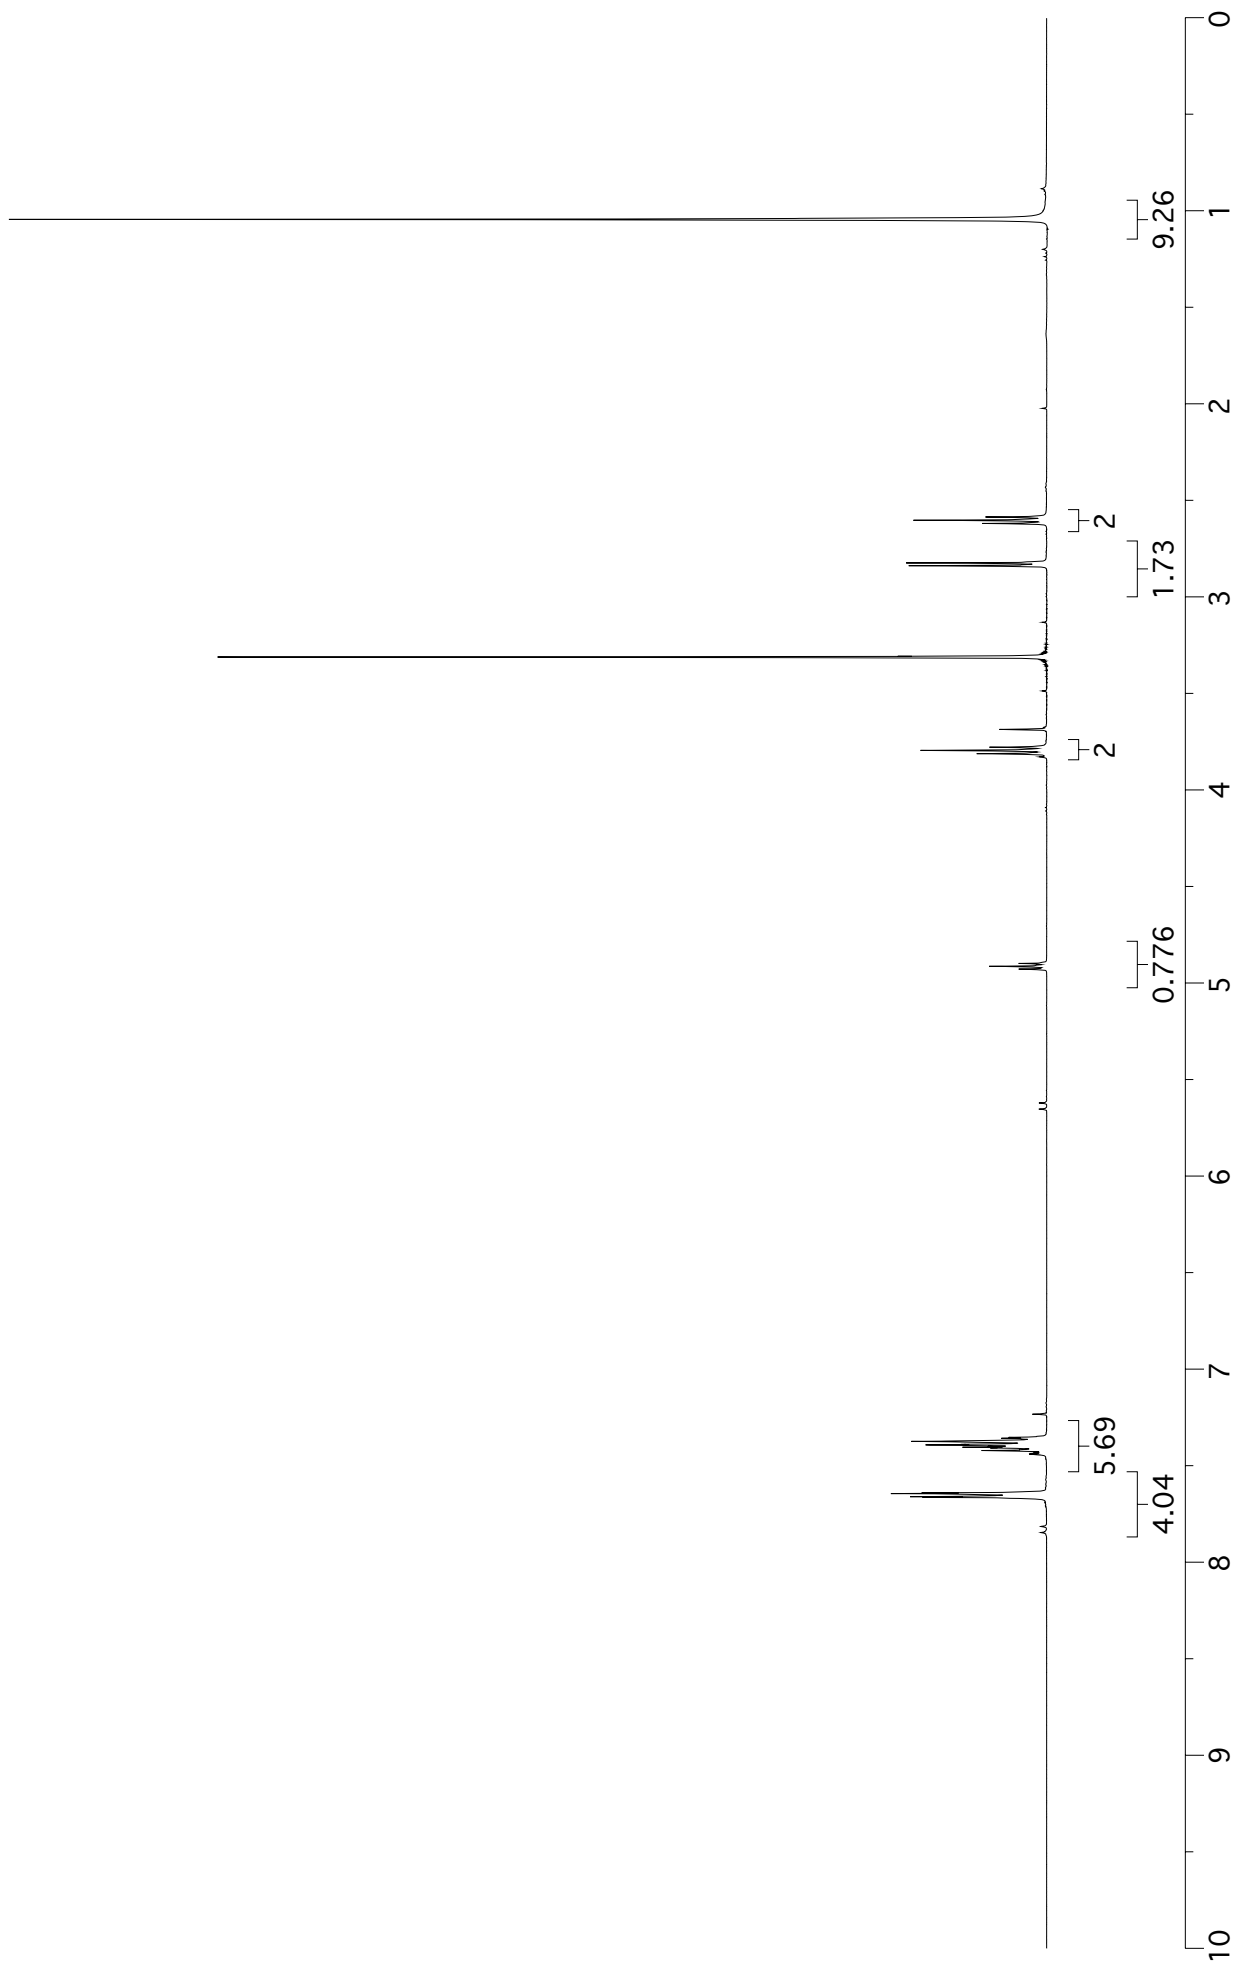



S25

26.9  
23.3  
19.4

49.0  
53.6  
61.5

81.9  
92.3  
100.7

128.0  
130.0  
133.3  
135.7

183.6

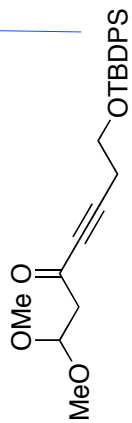

11

100 MHz, CDCl<sub>3</sub>

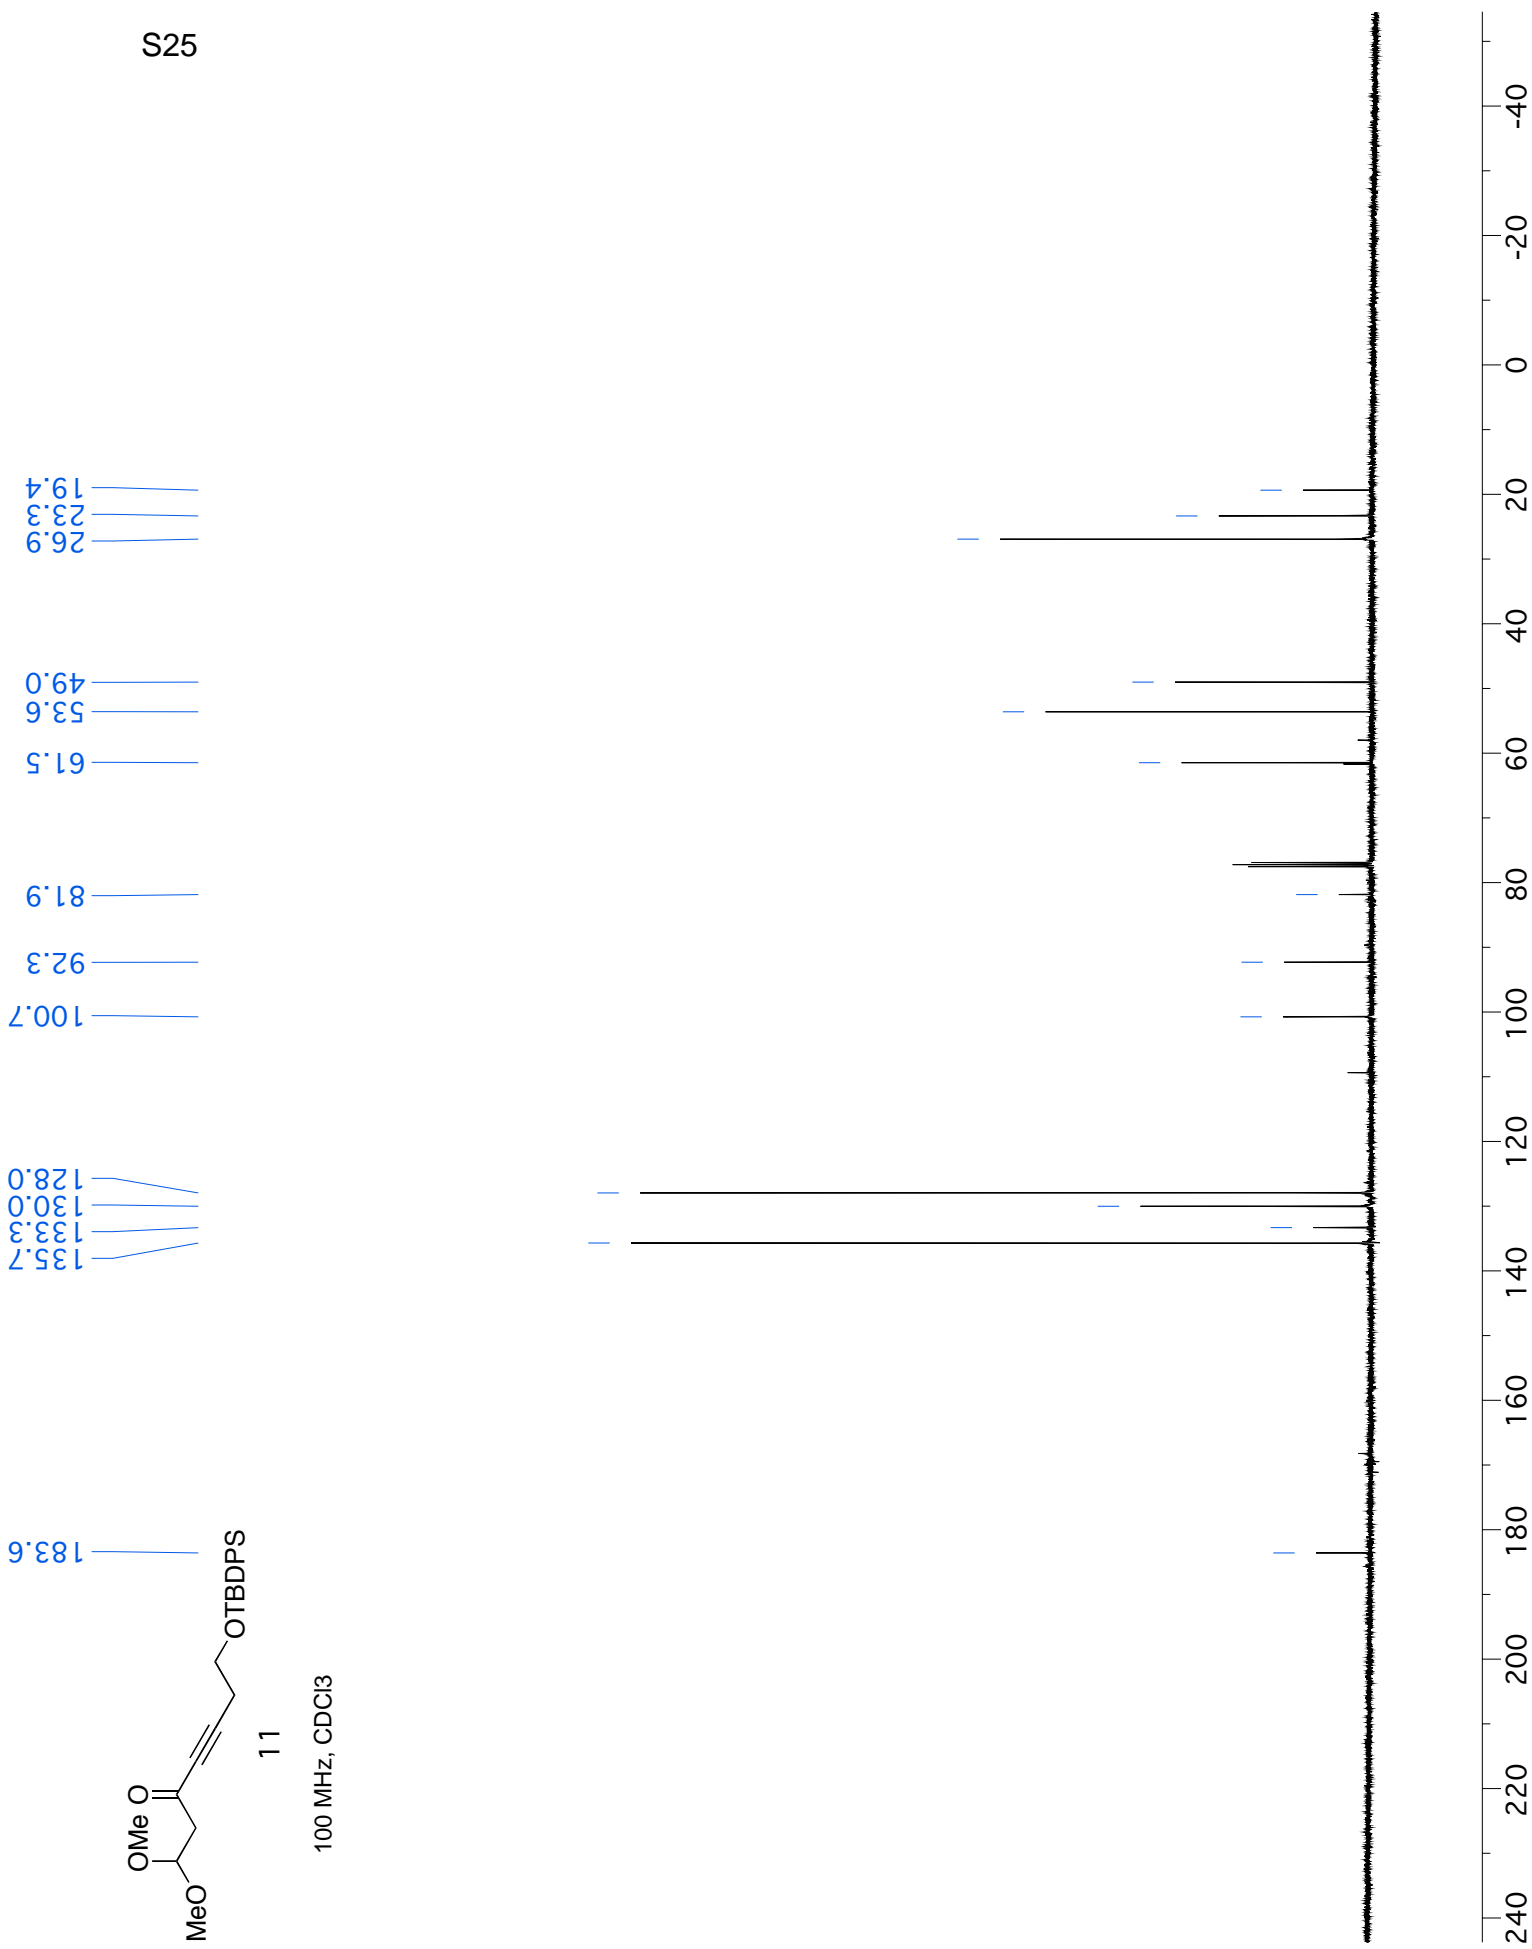

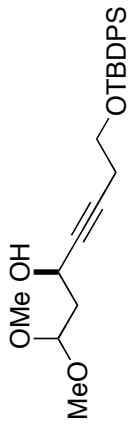

S26

400 MHz, CDCl<sub>3</sub>

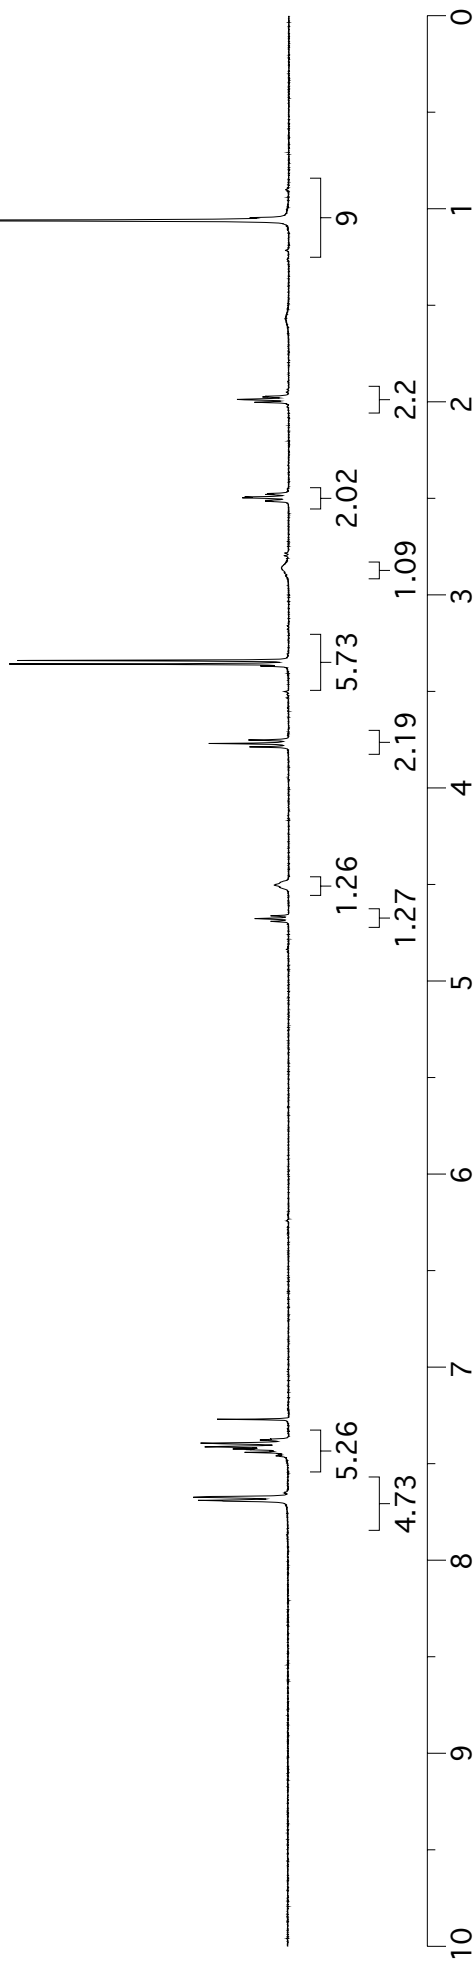

S27

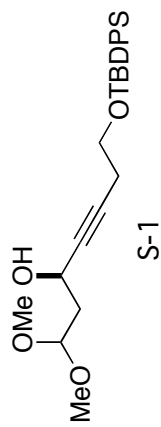

100 MHz, CDCl<sub>3</sub>

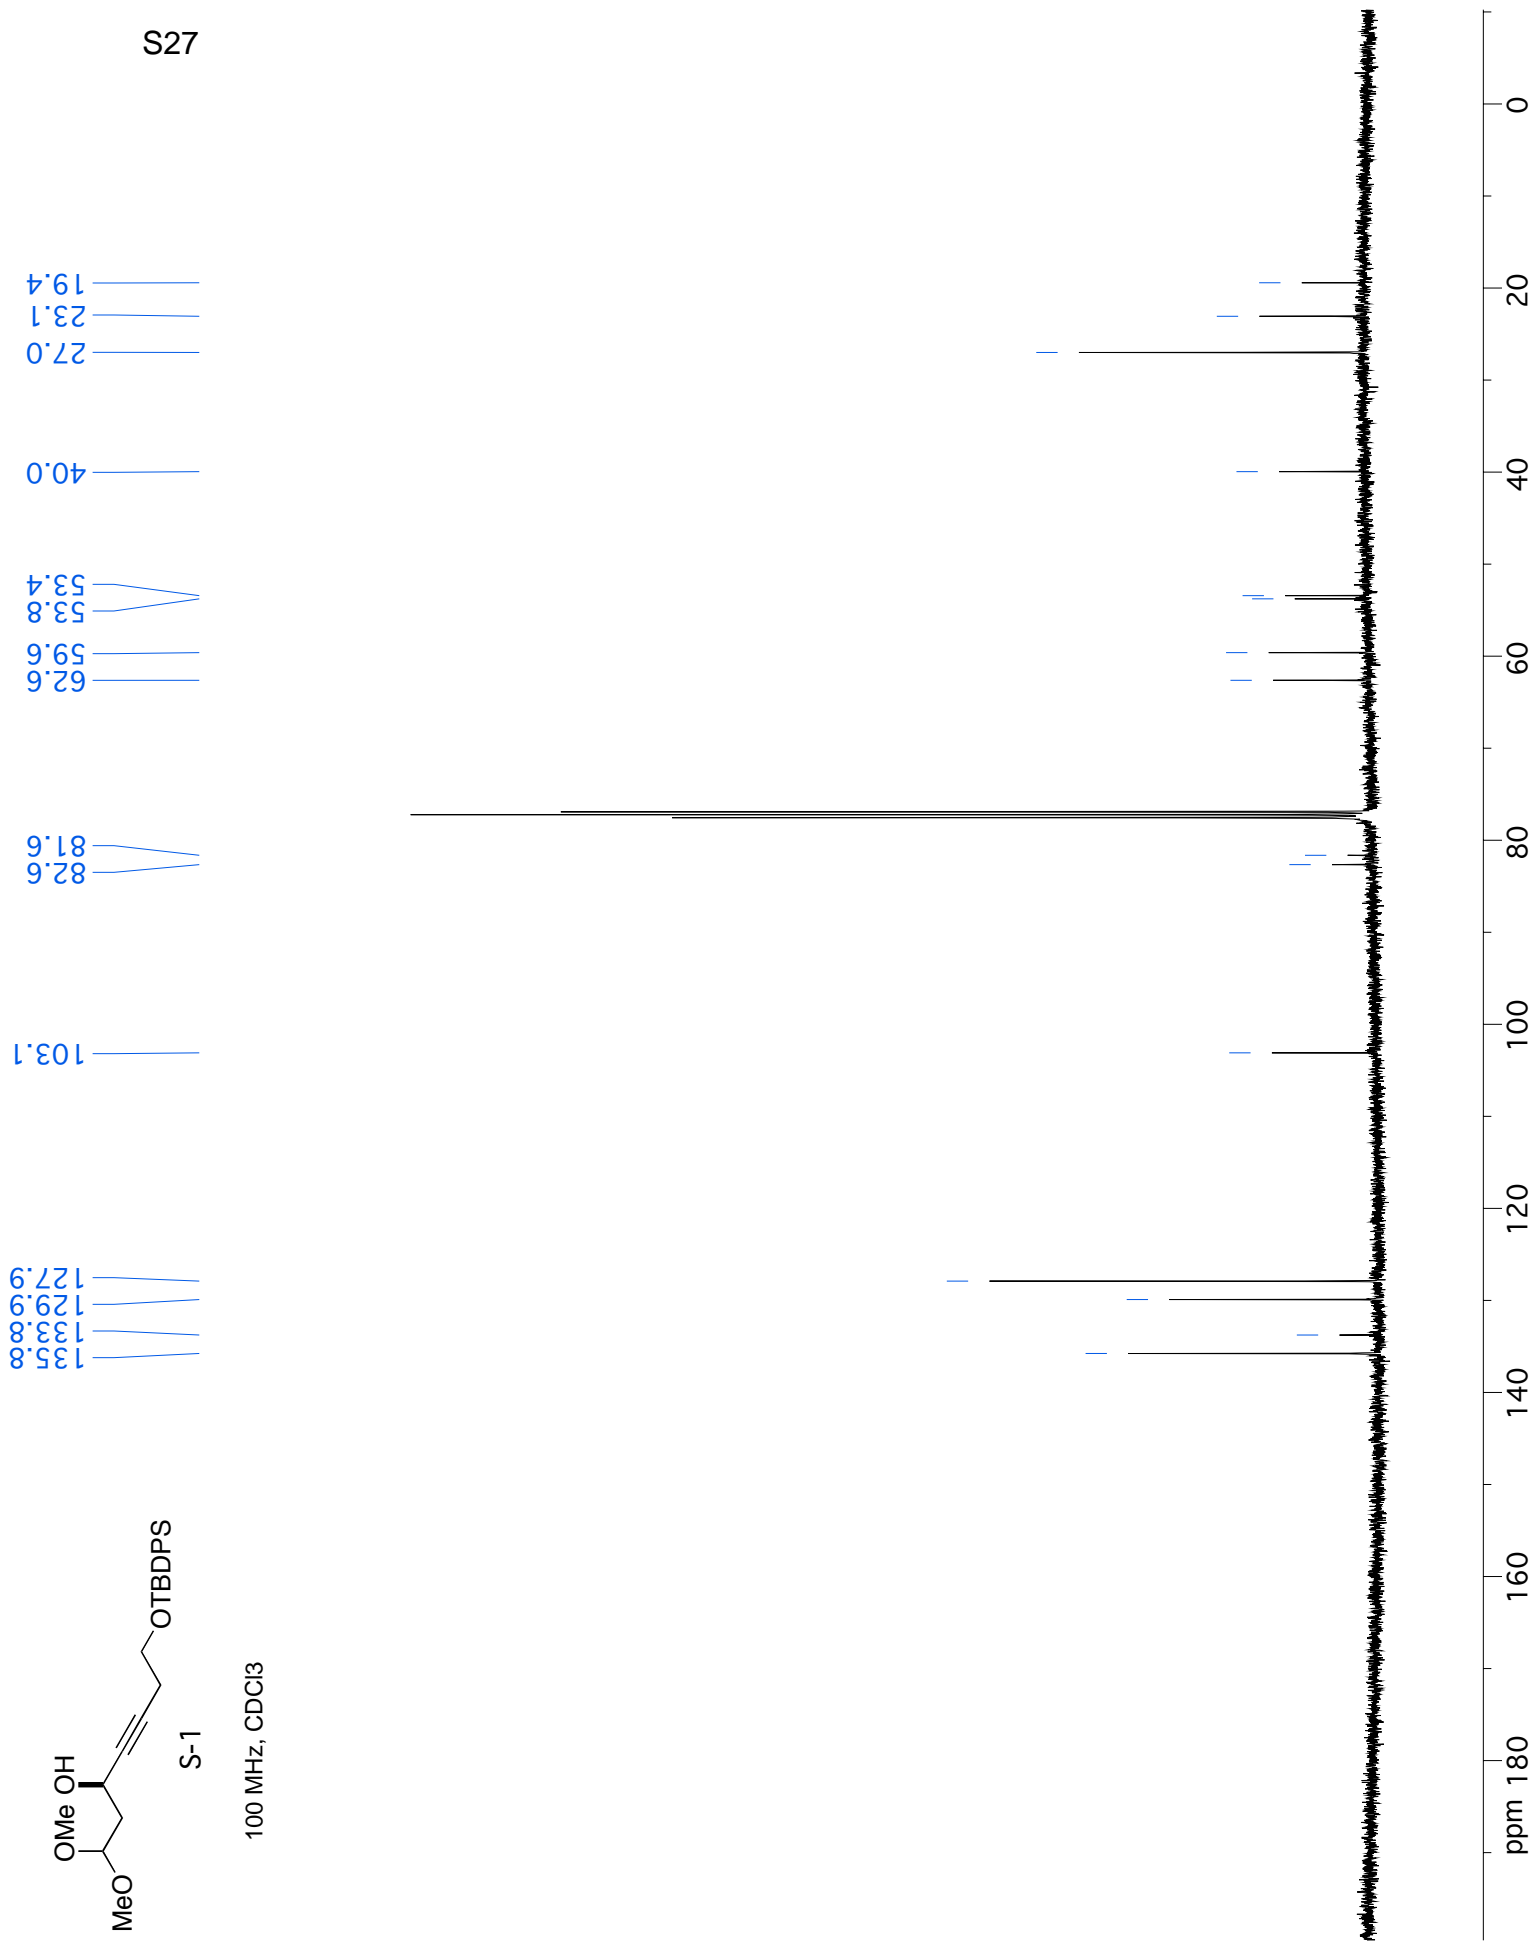

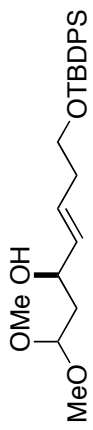

13

400 MHz, CDCl<sub>3</sub>

S28

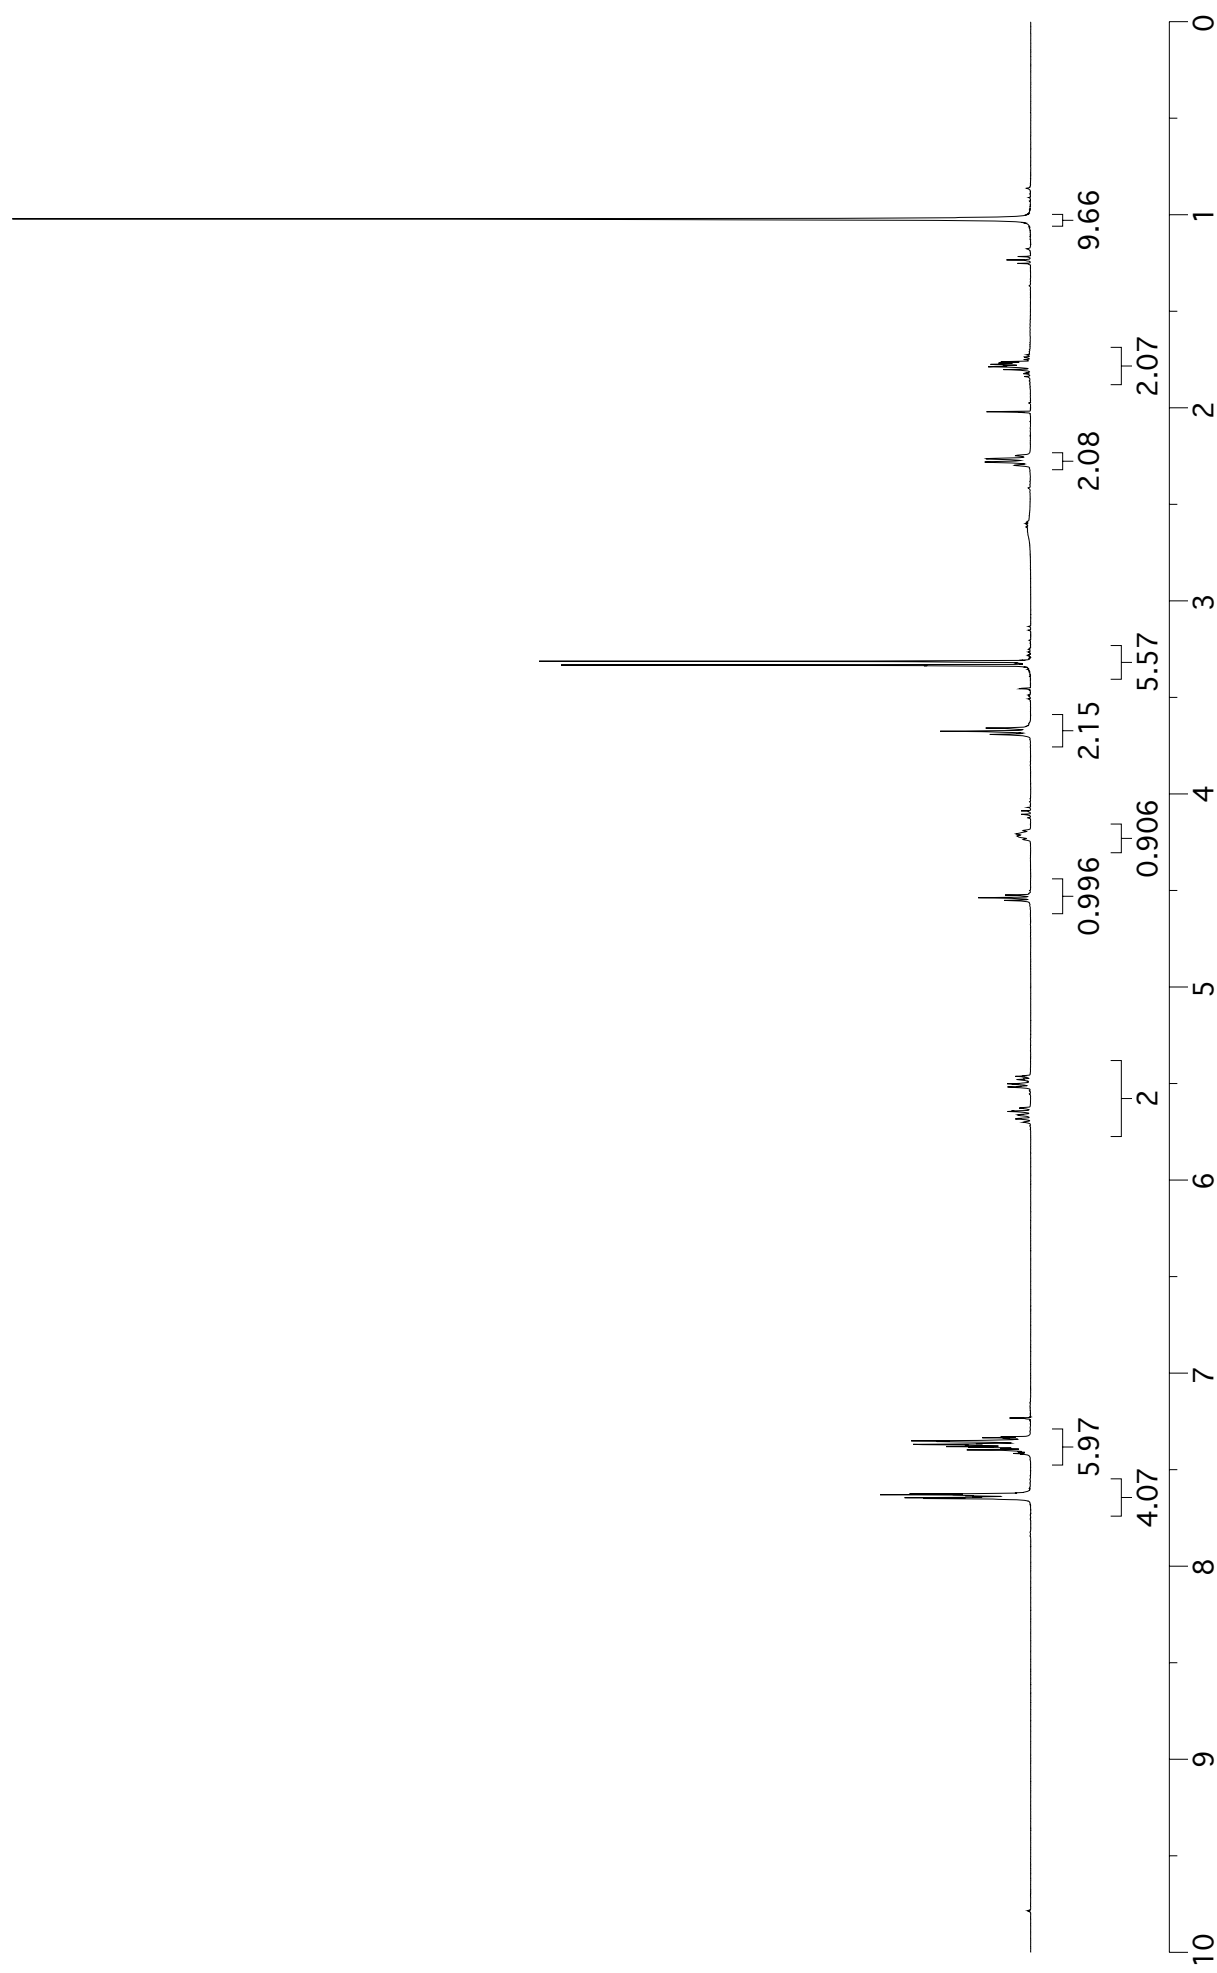

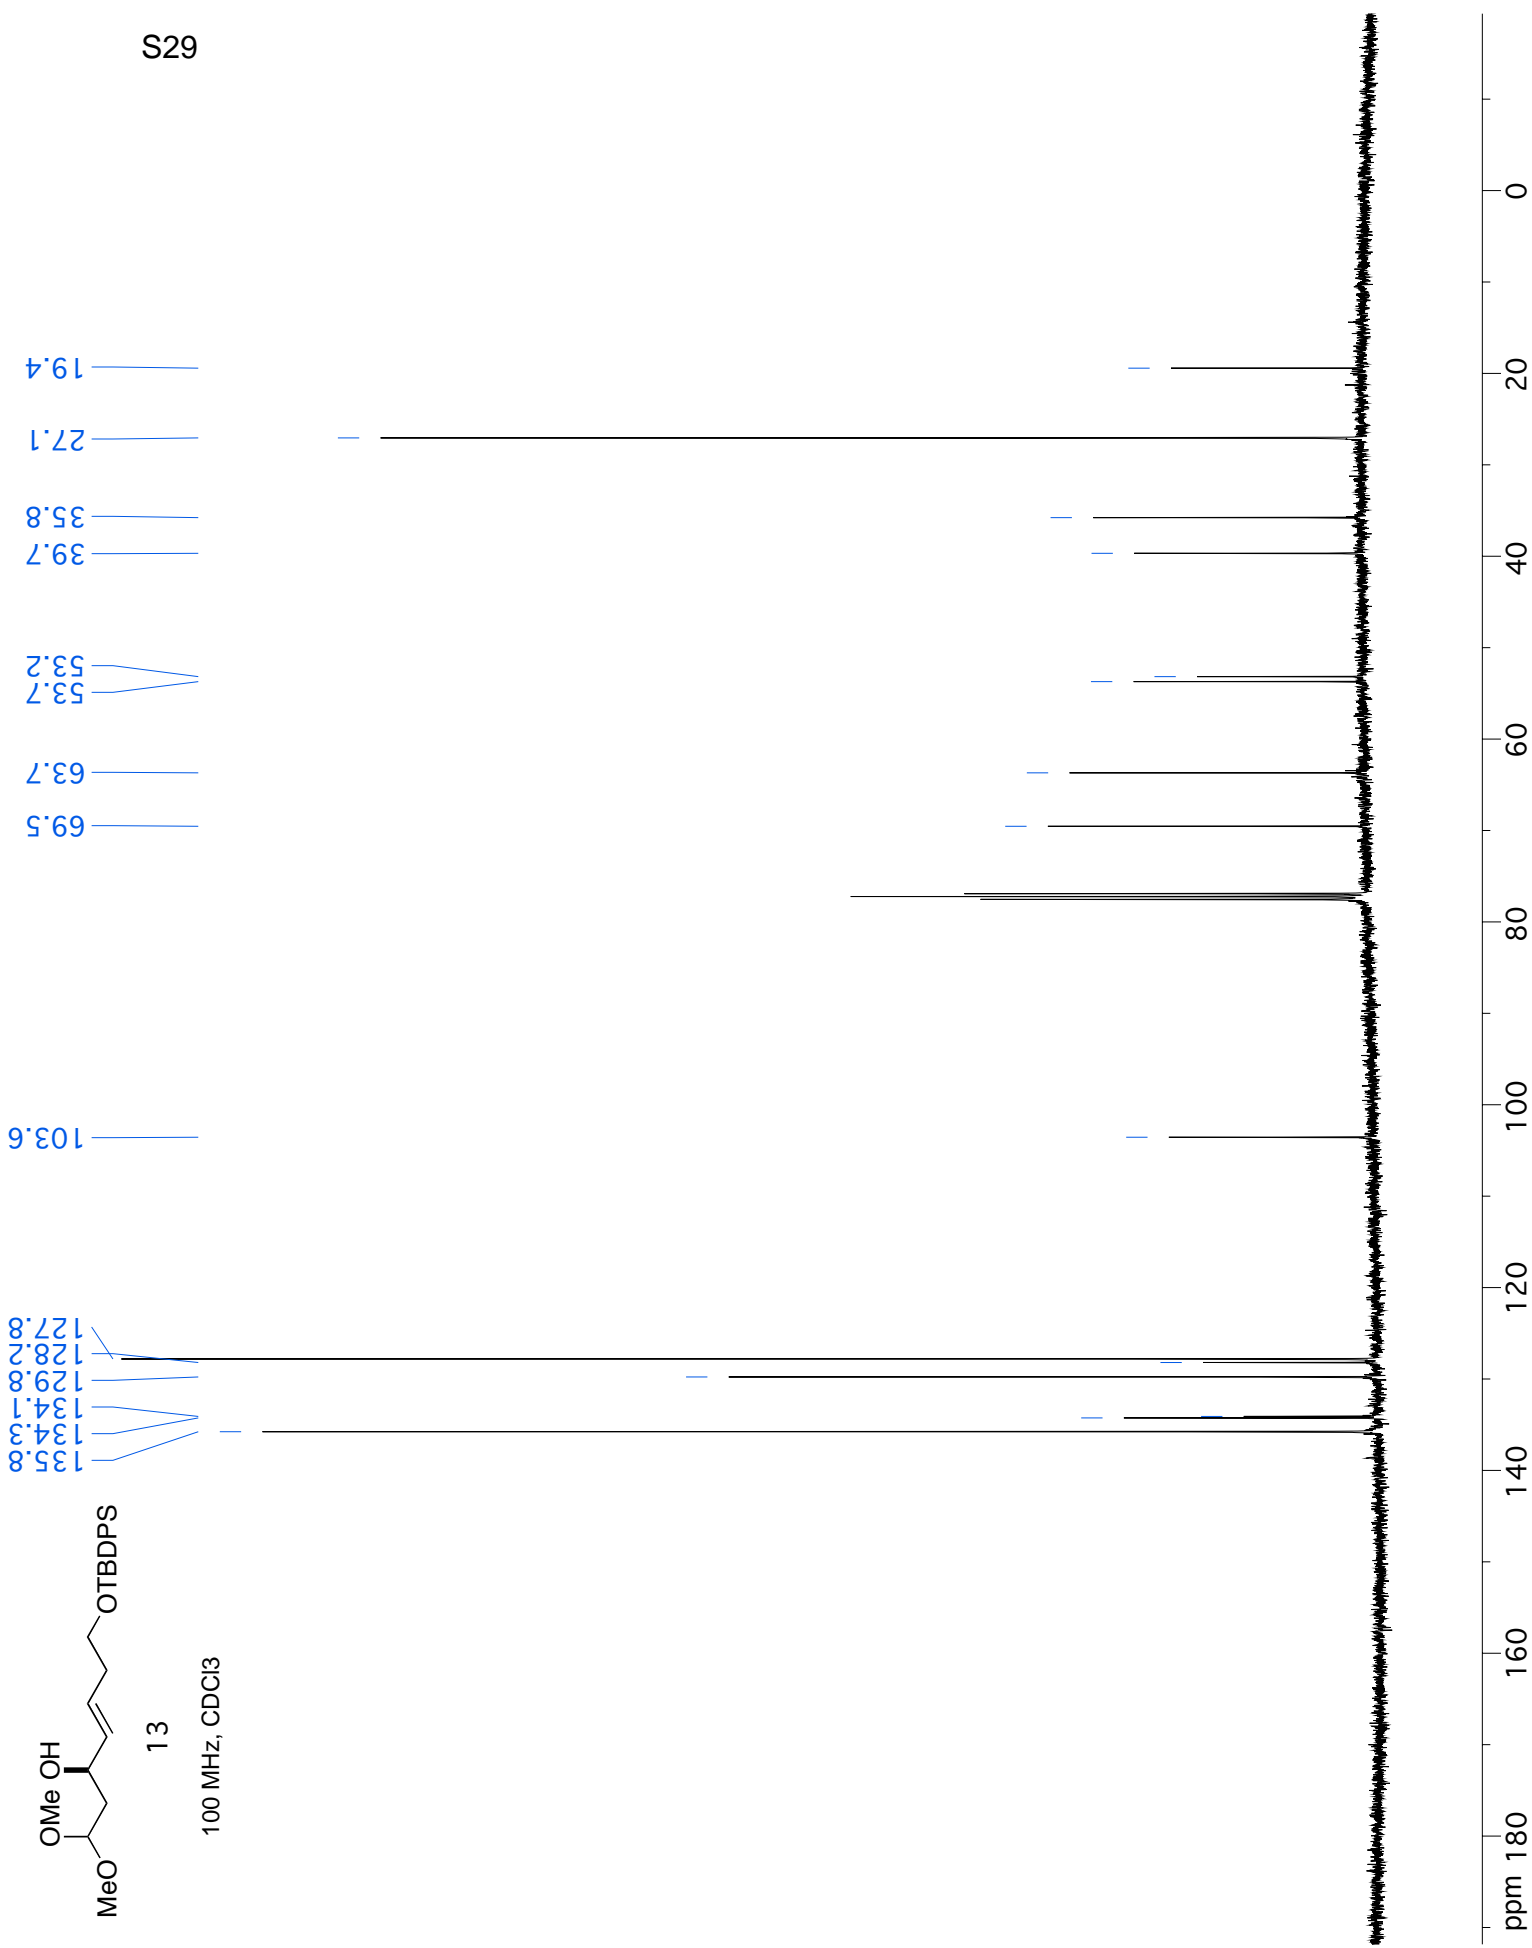

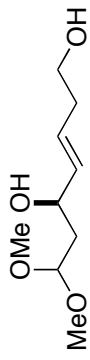

S-2

400 MHz, CDCl<sub>3</sub>

S30

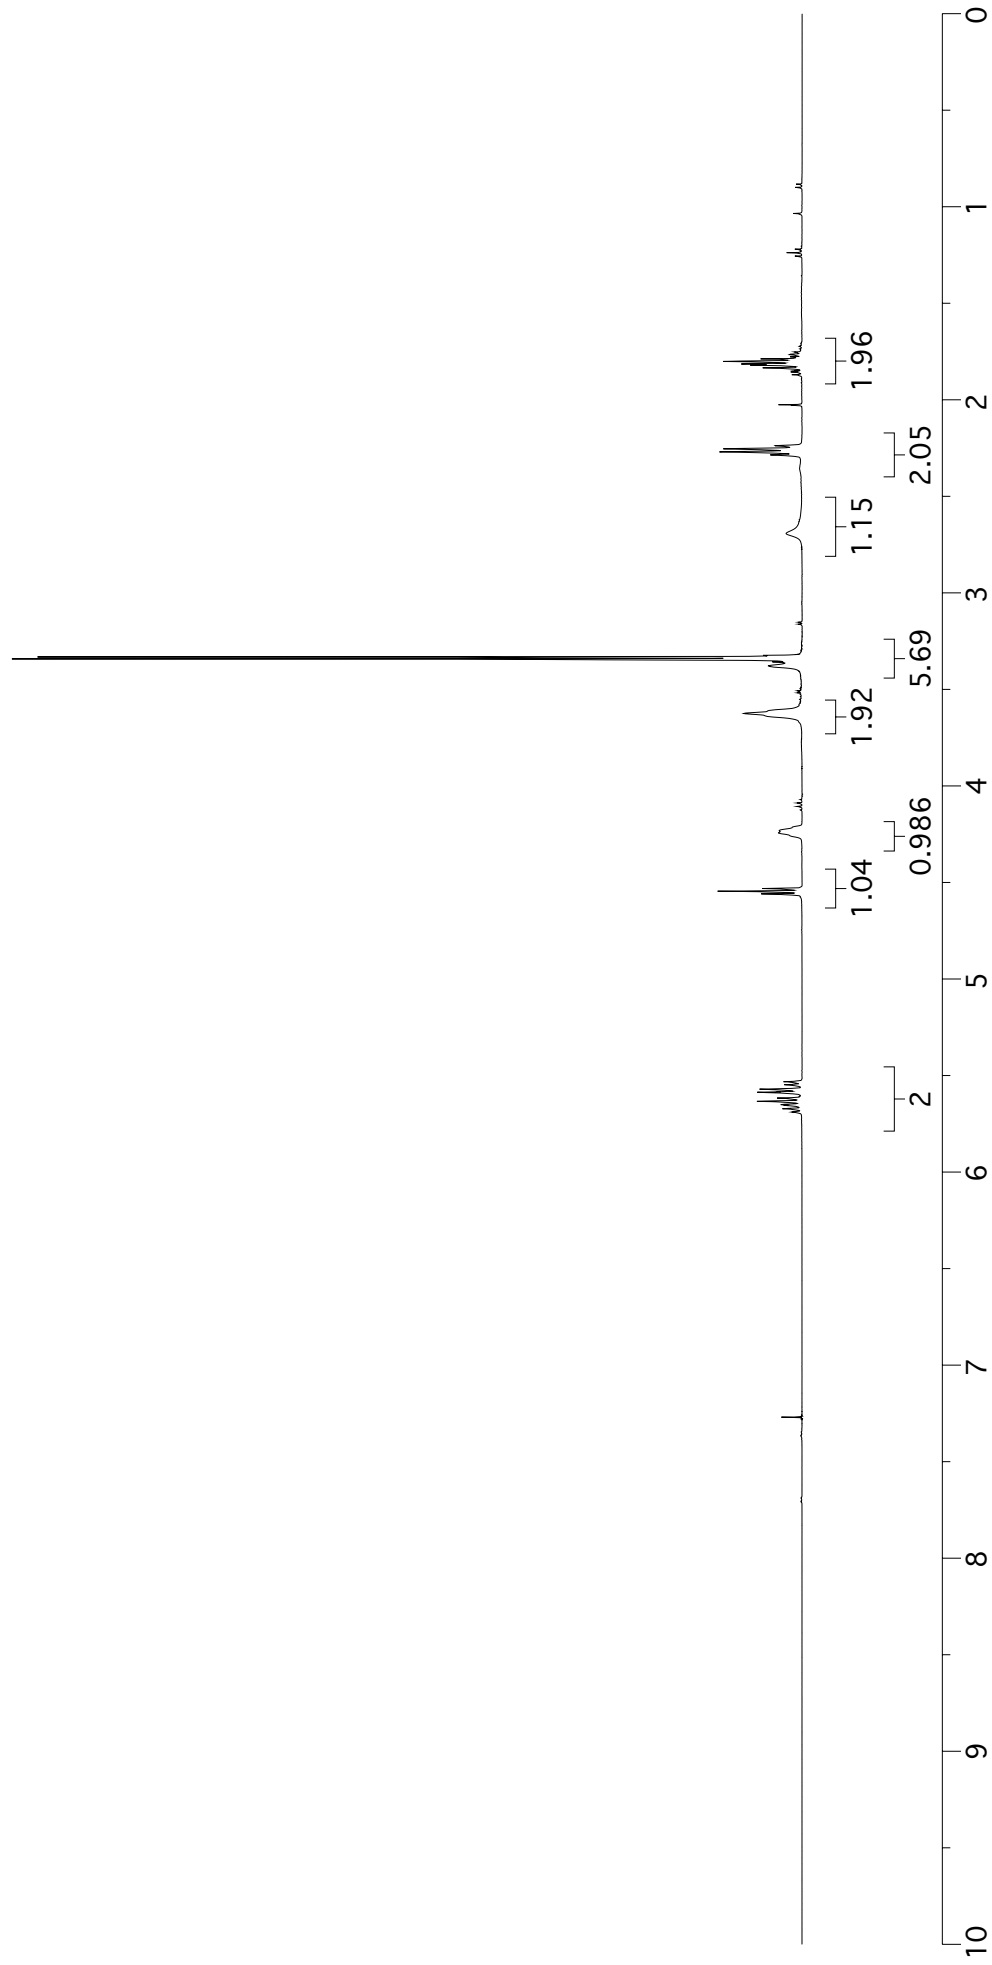

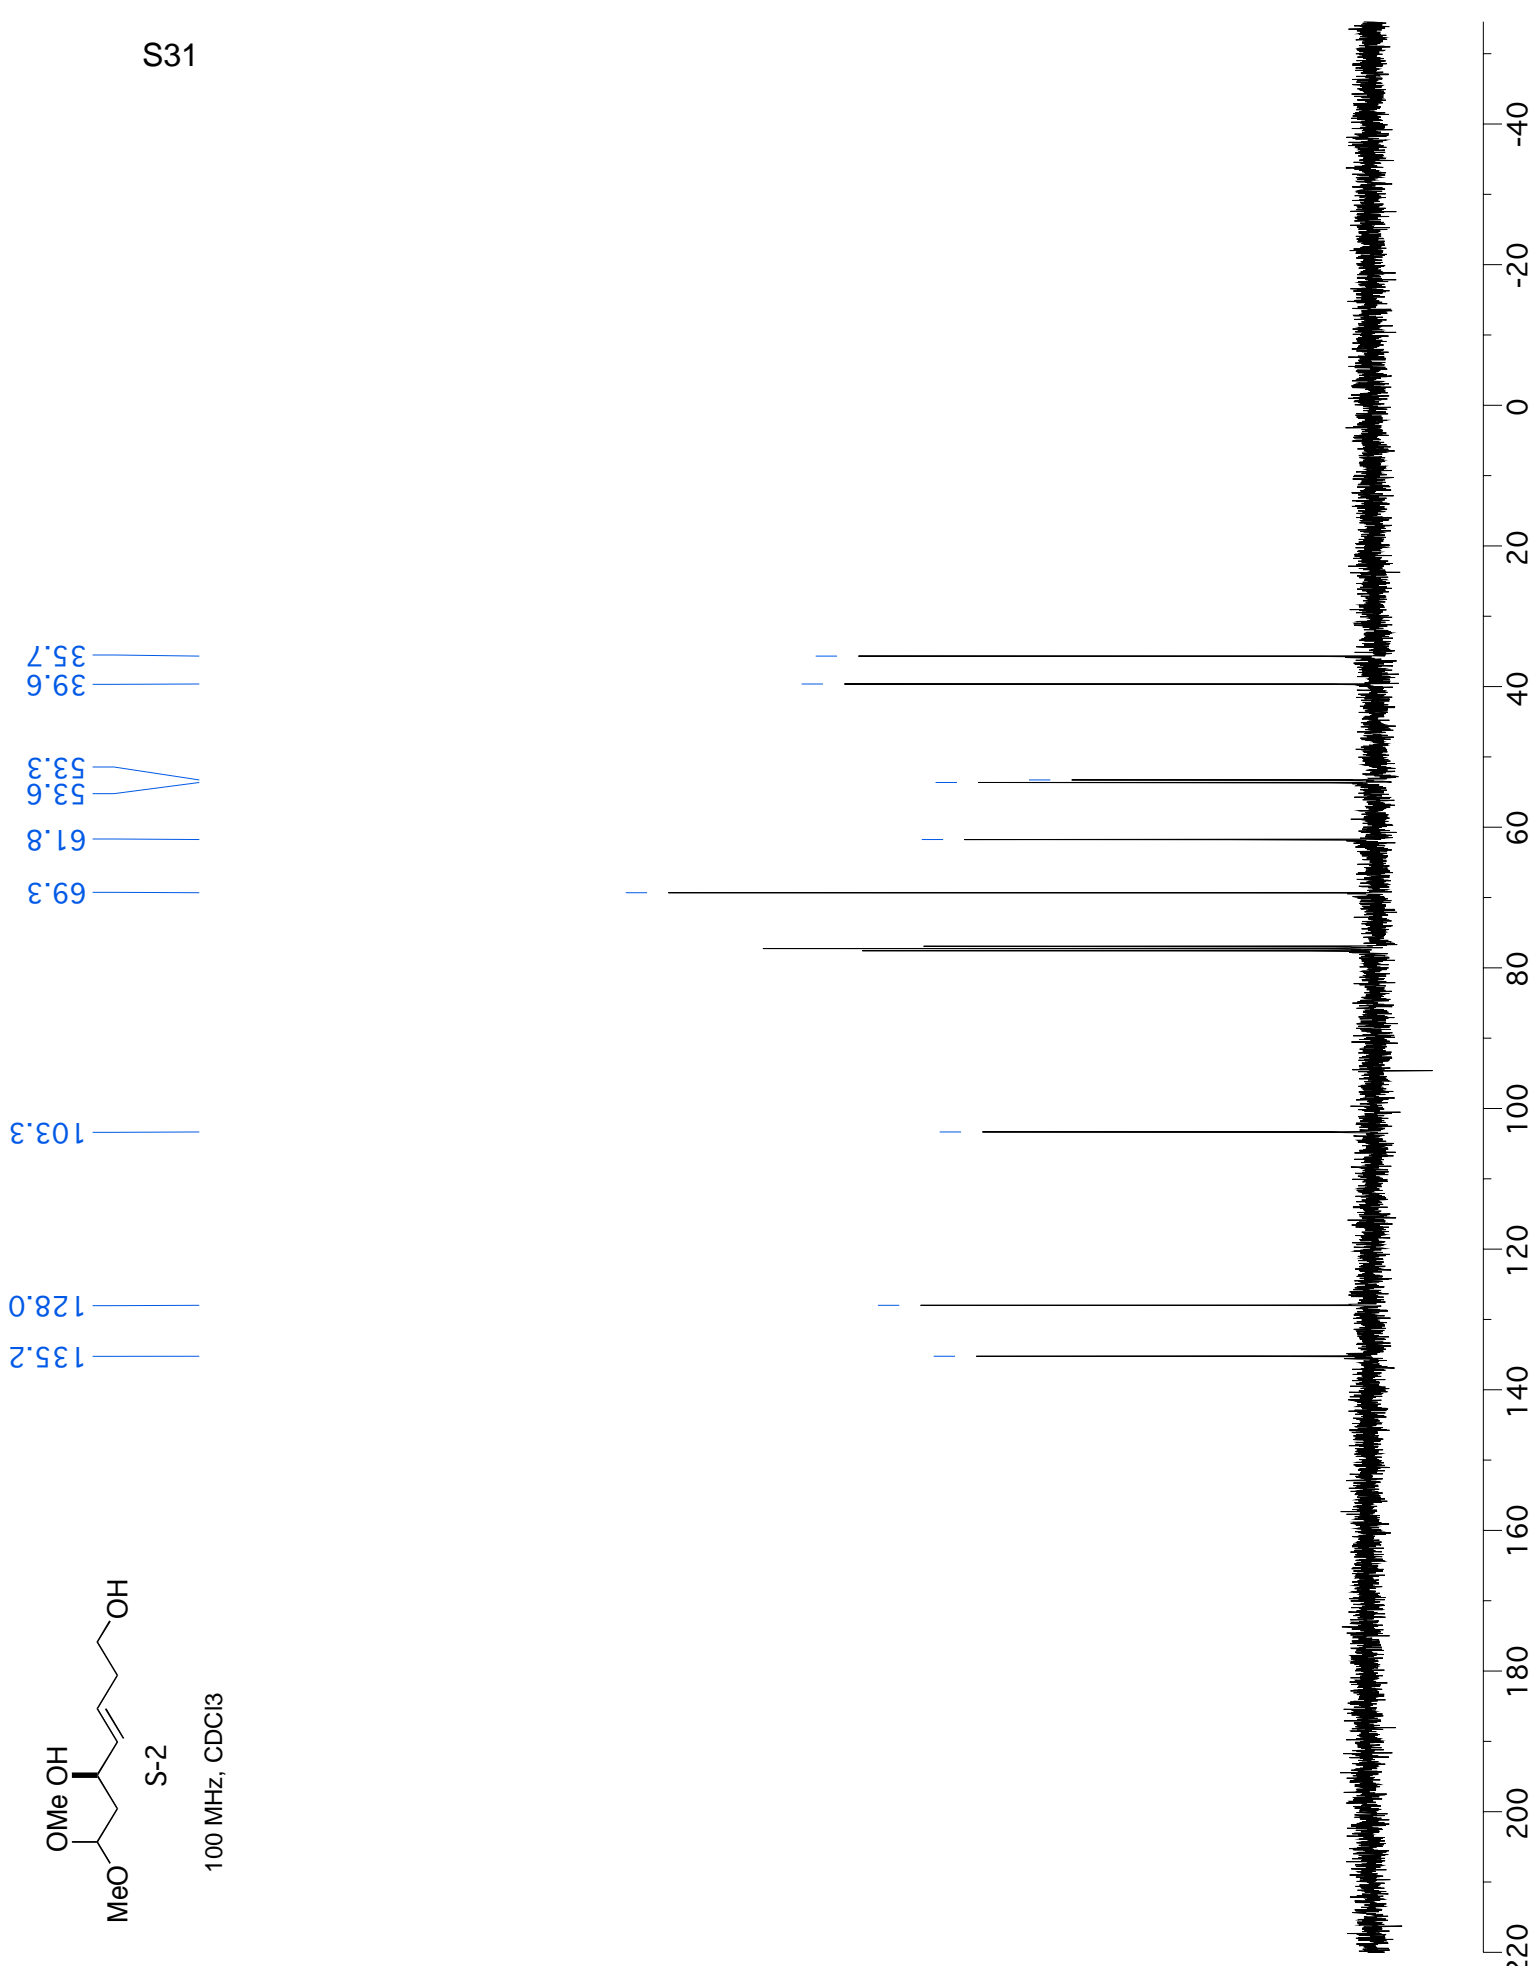

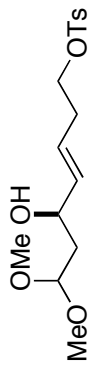

14

400 MHz, CDCl<sub>3</sub>

S32

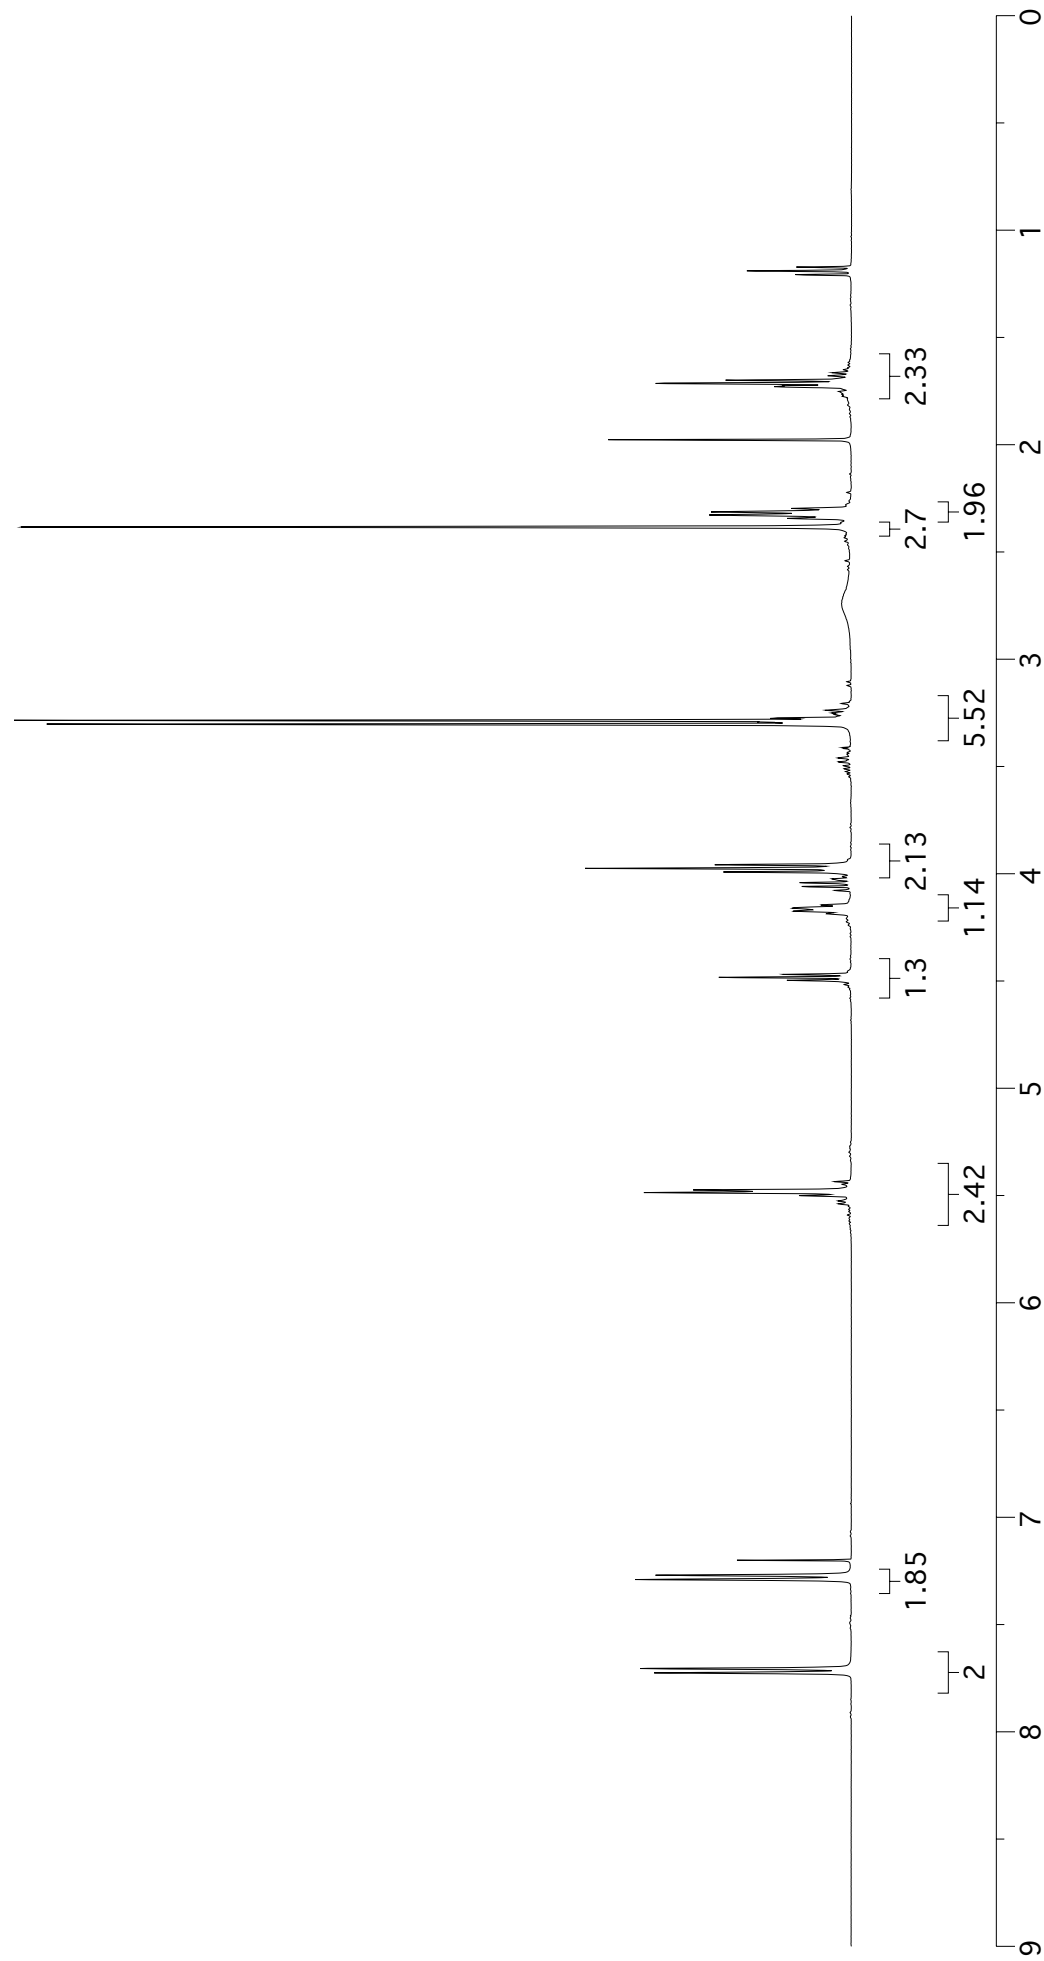



S33

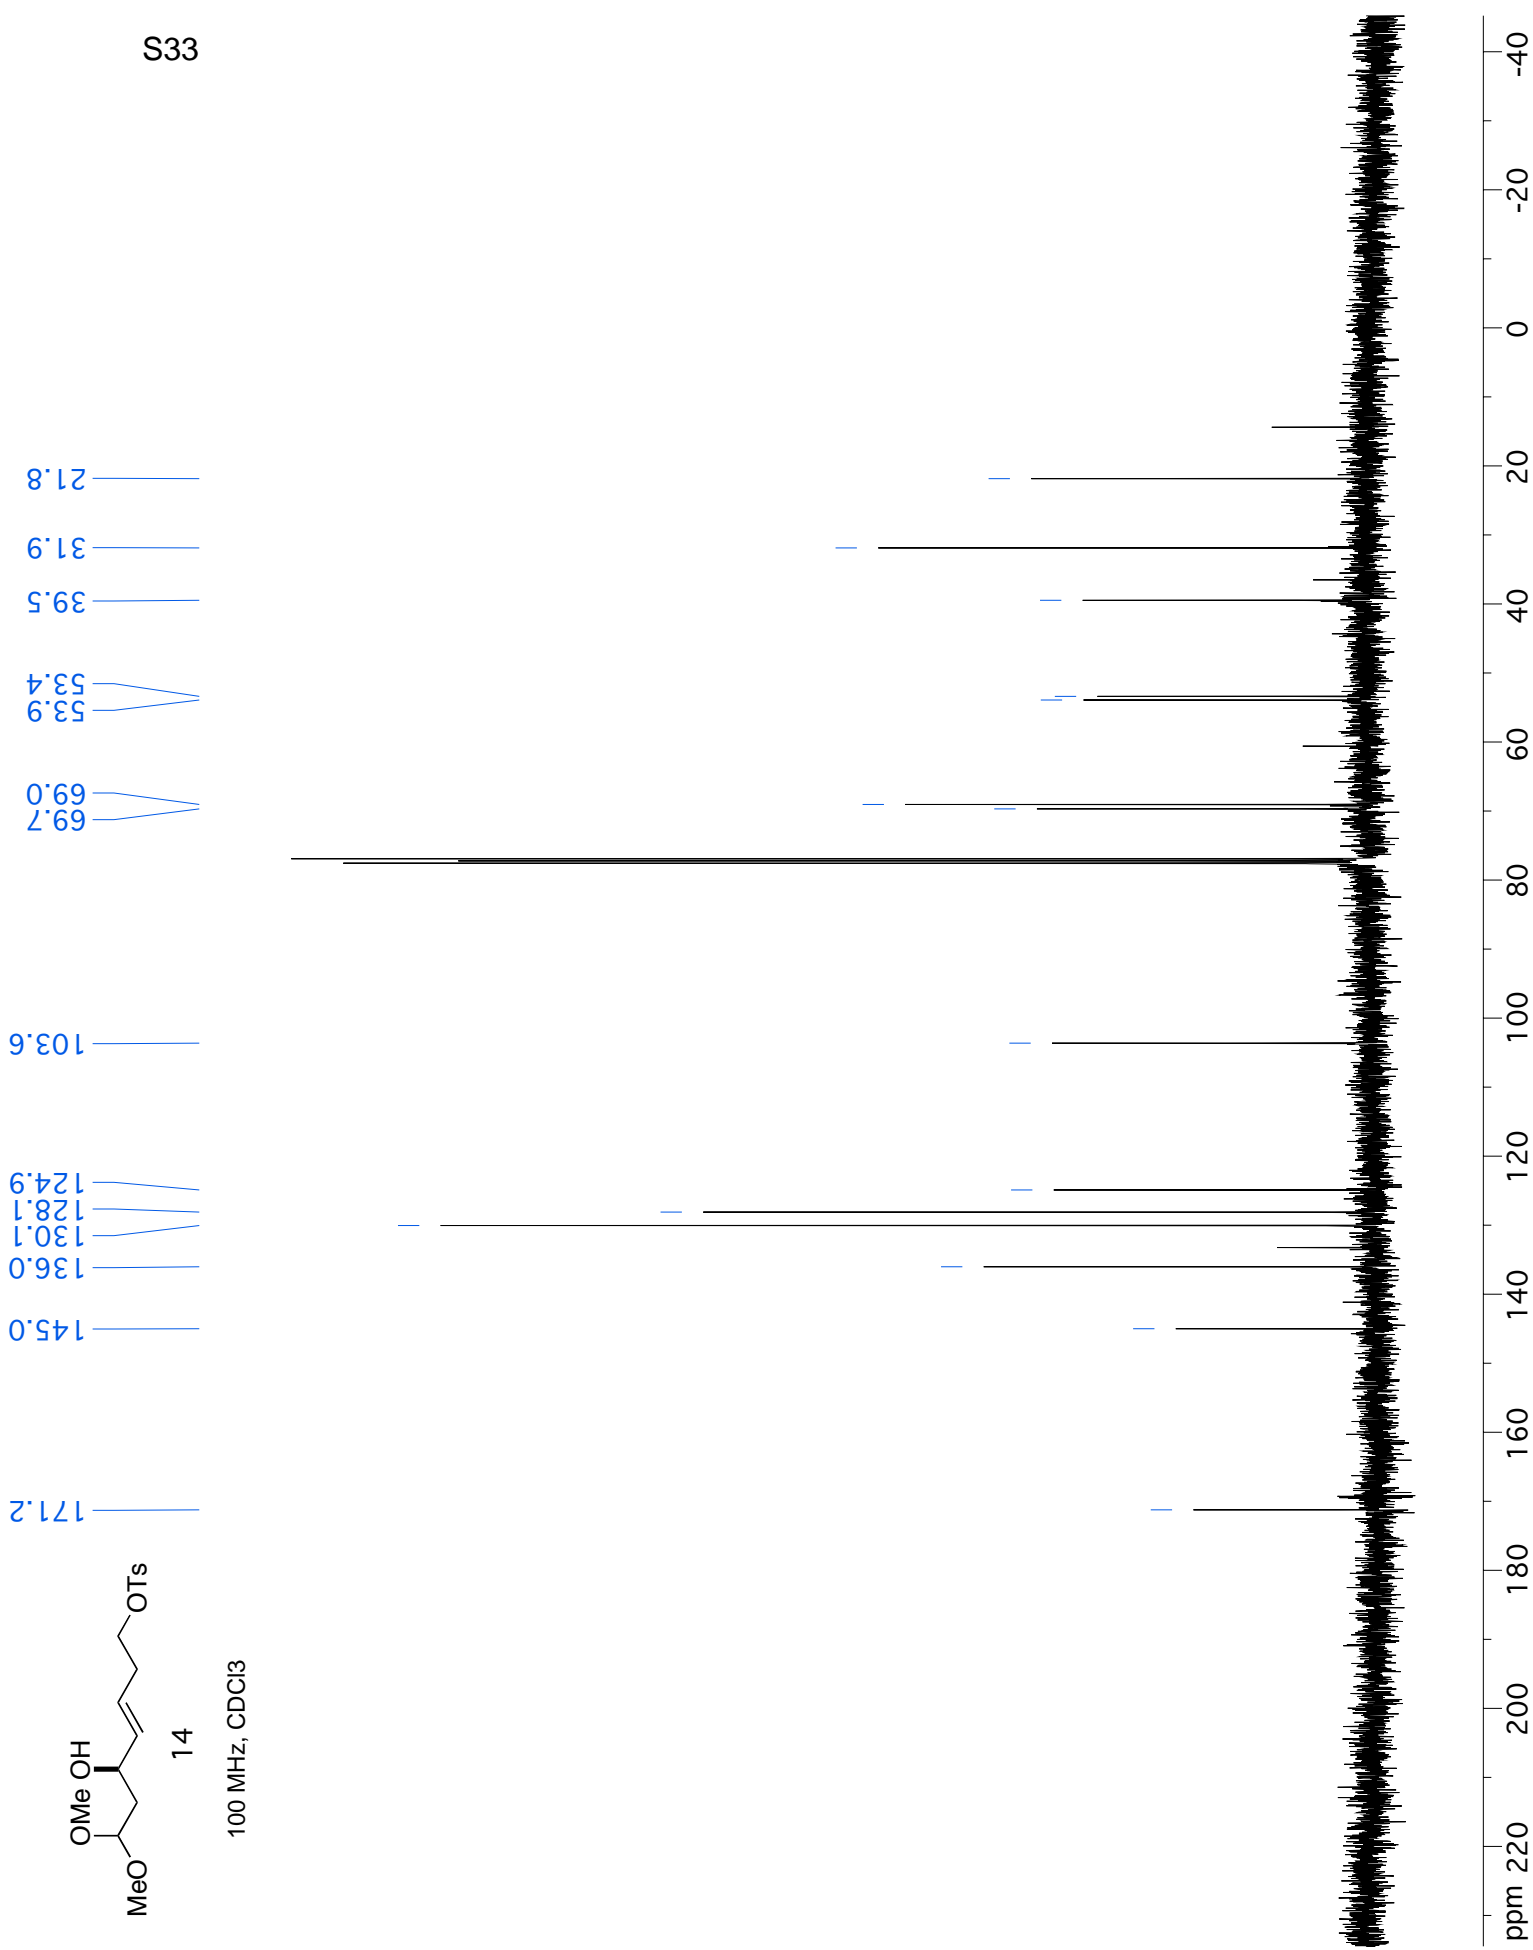

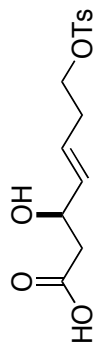

S-4

400 MHz, CDCl<sub>3</sub>

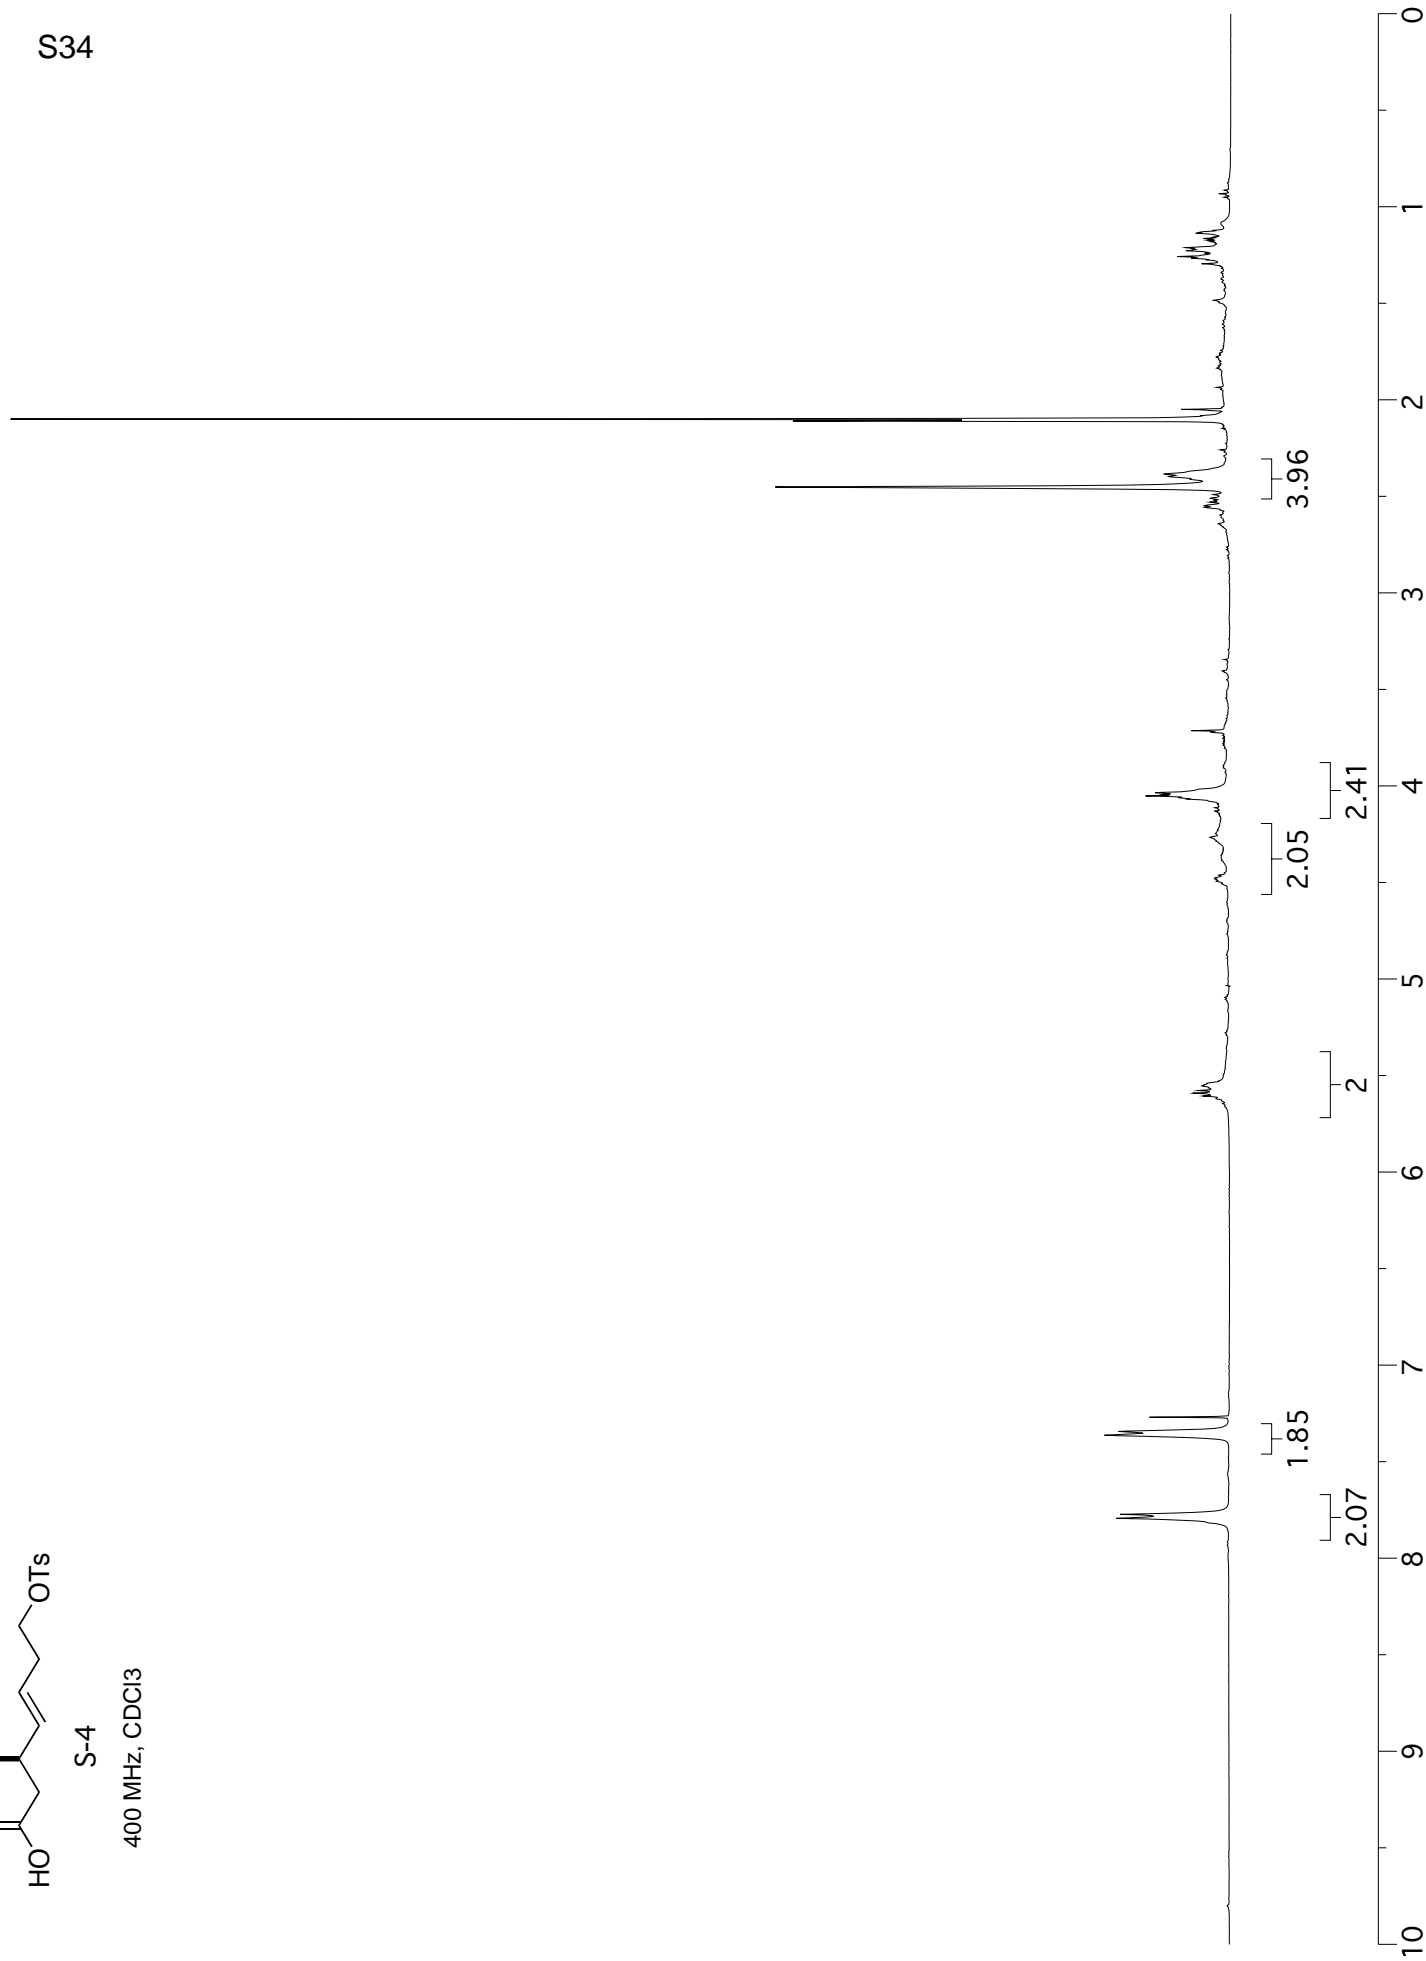

S35

21.0  
21.9

31.8

41.3

68.4  
69.5

128.1  
130.1  
133.2  
134.2

145.1  
145.1

177.5

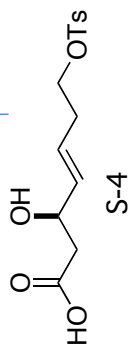

100 MHz, CDCl<sub>3</sub>

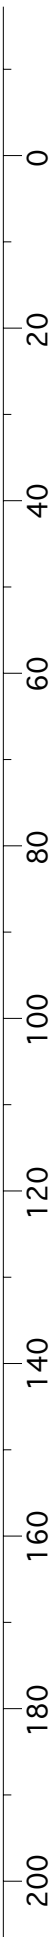

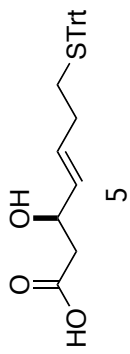

300 MHz, CDCl<sub>3</sub>

S36

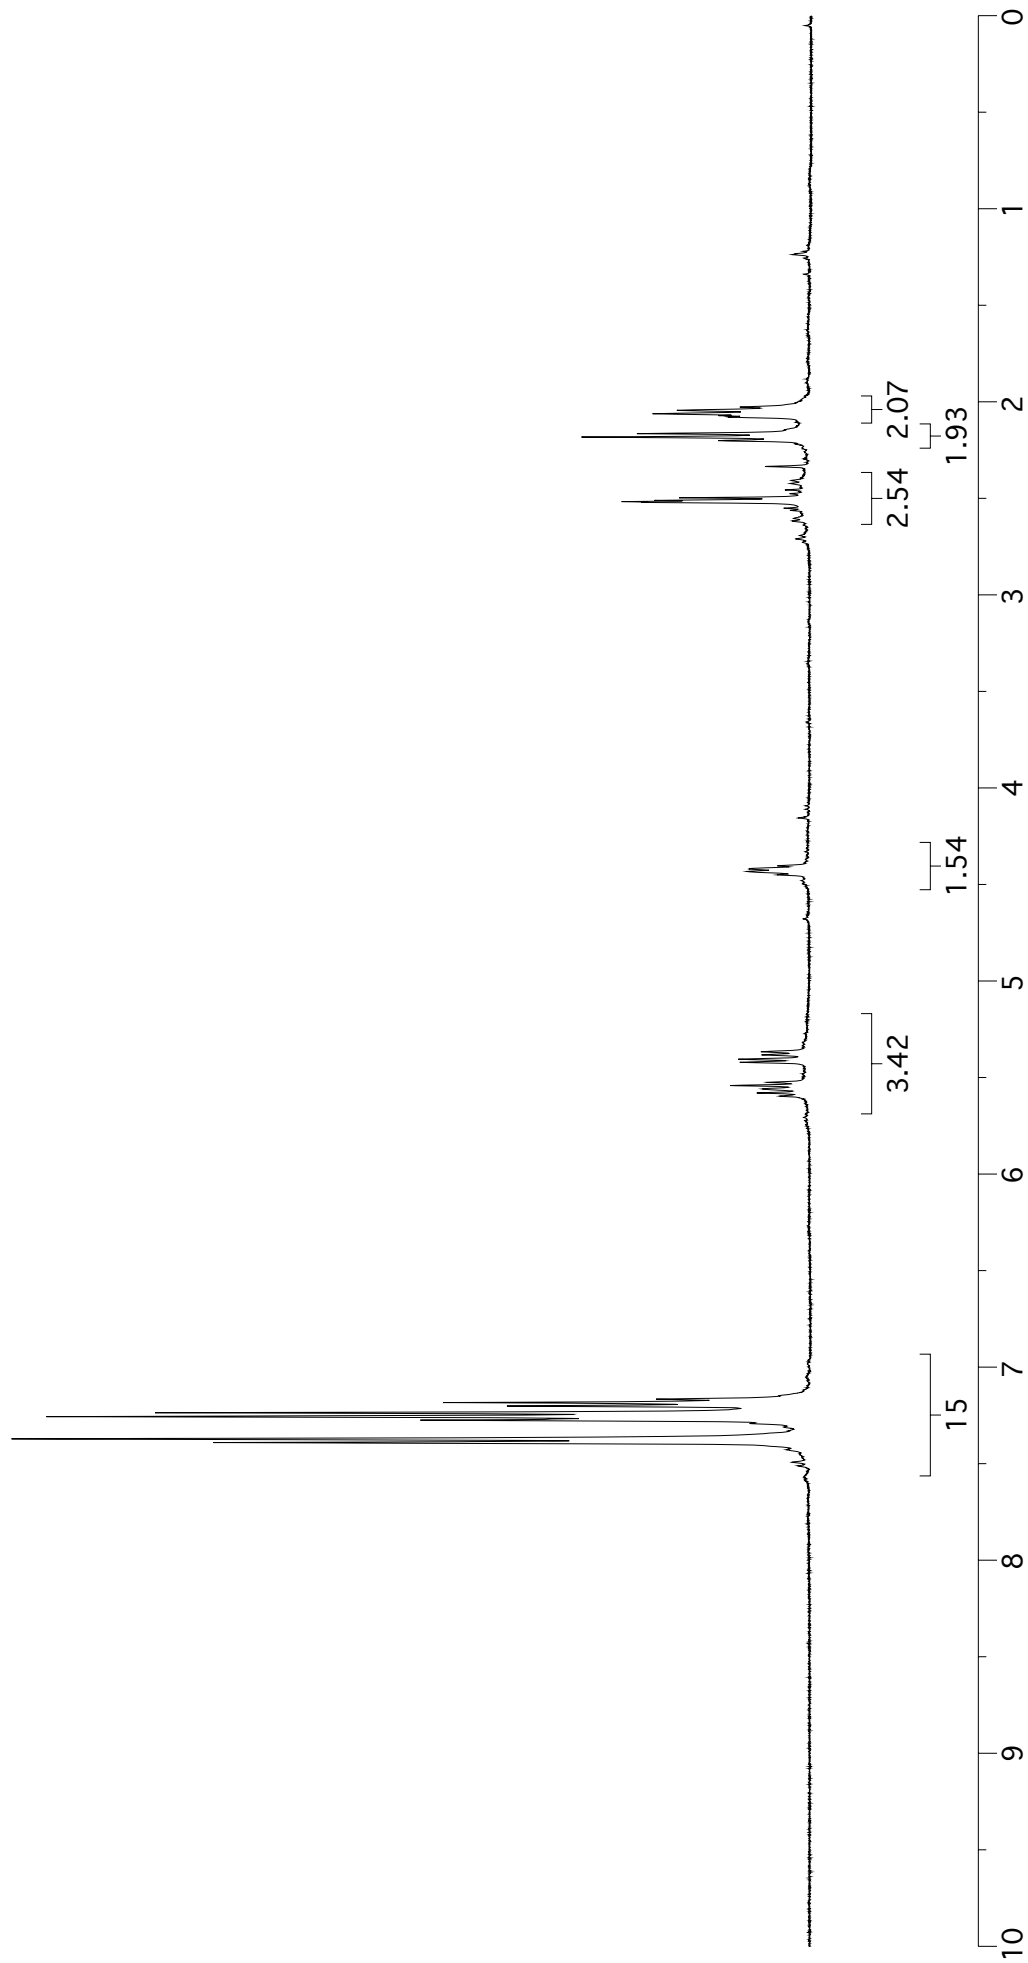

S37

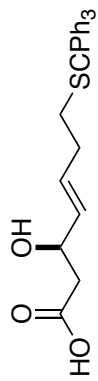

5

100 MHz, CDCl<sub>3</sub>

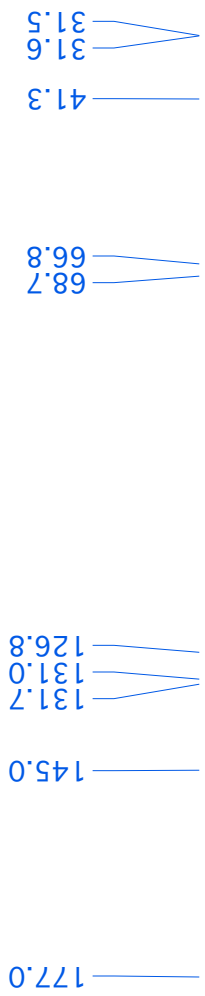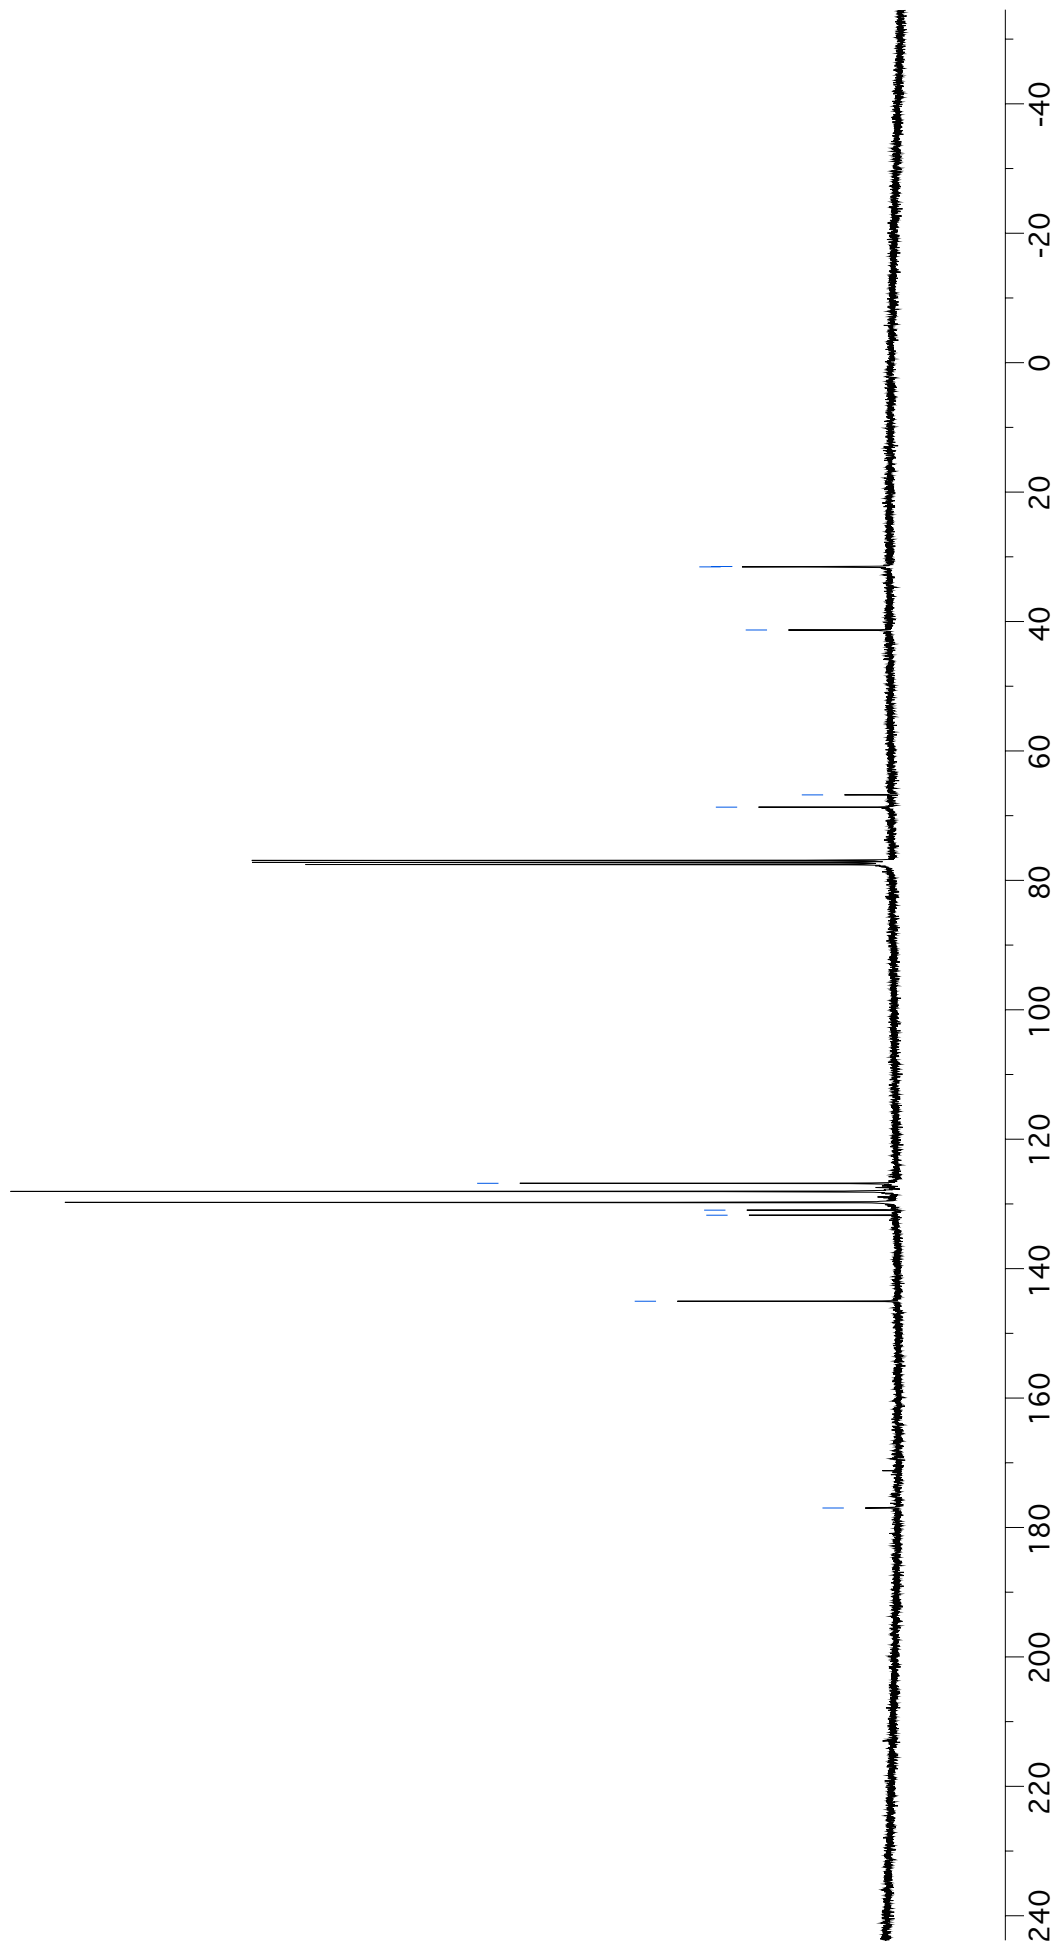

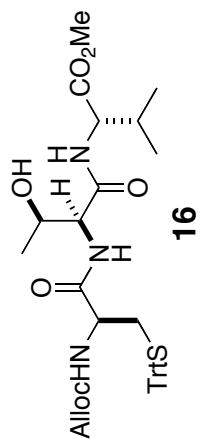400 MHz, CDCl<sub>3</sub>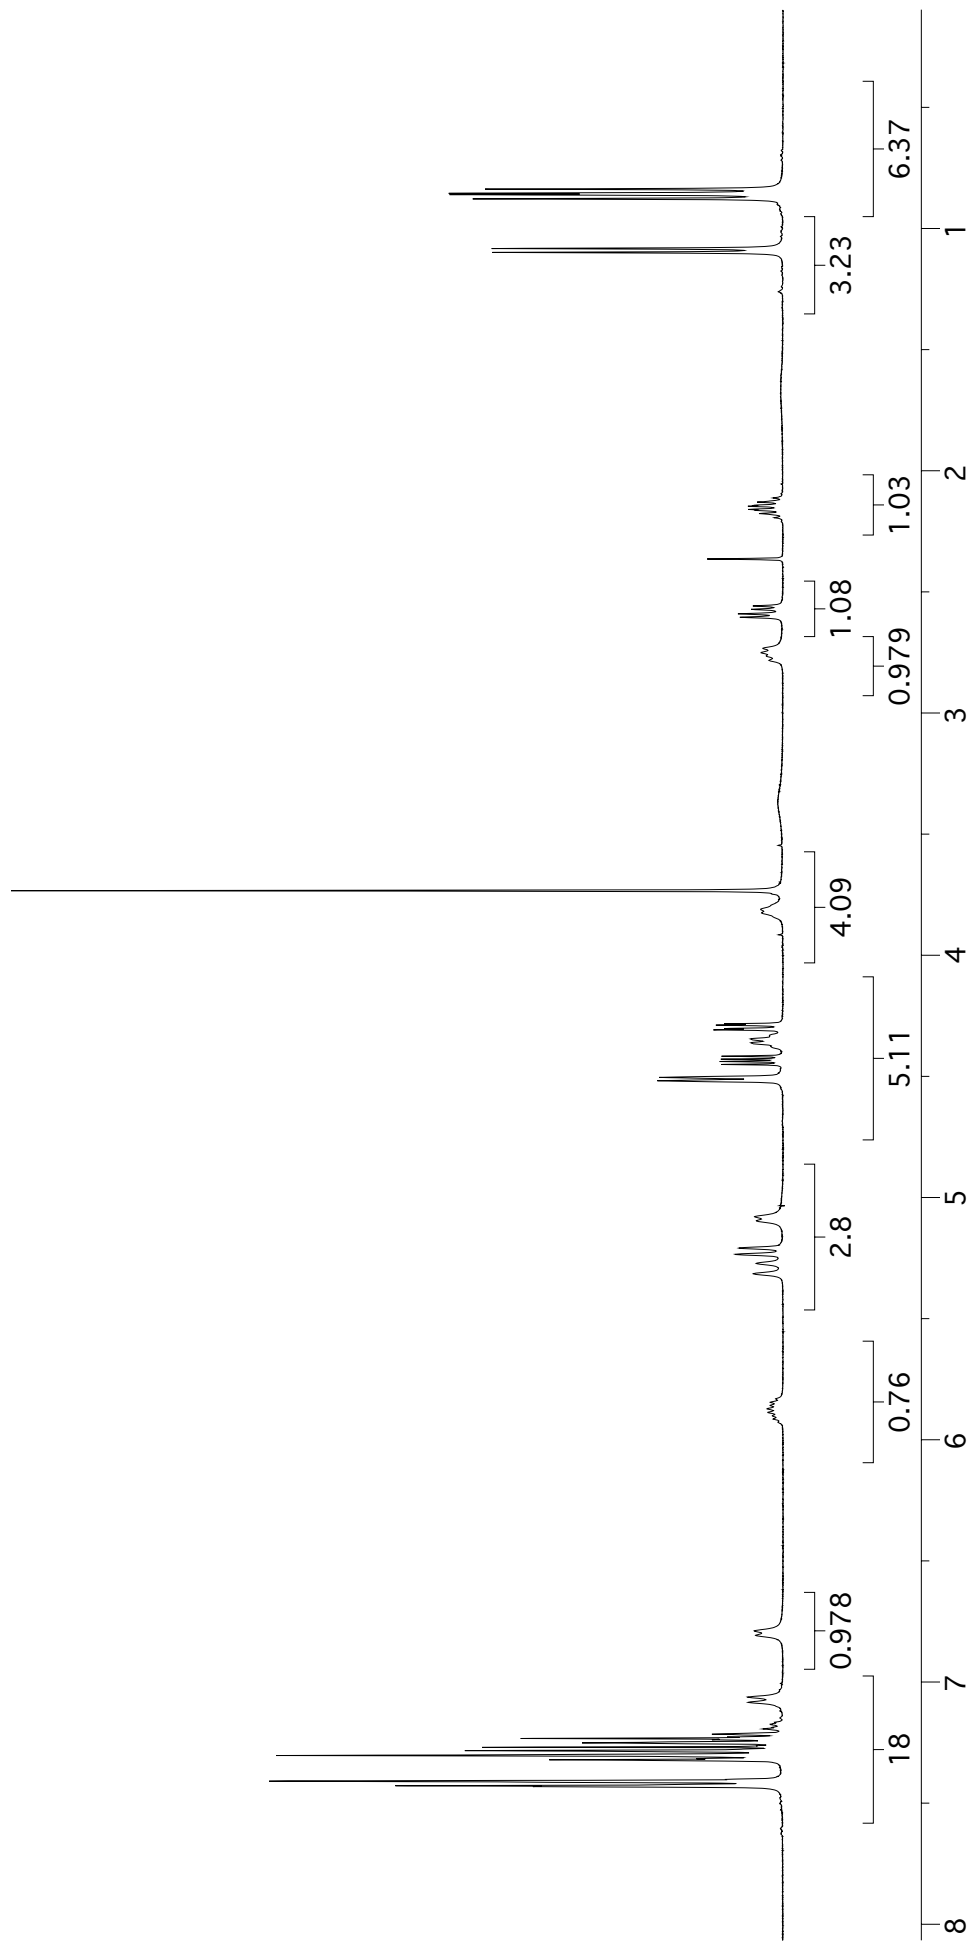

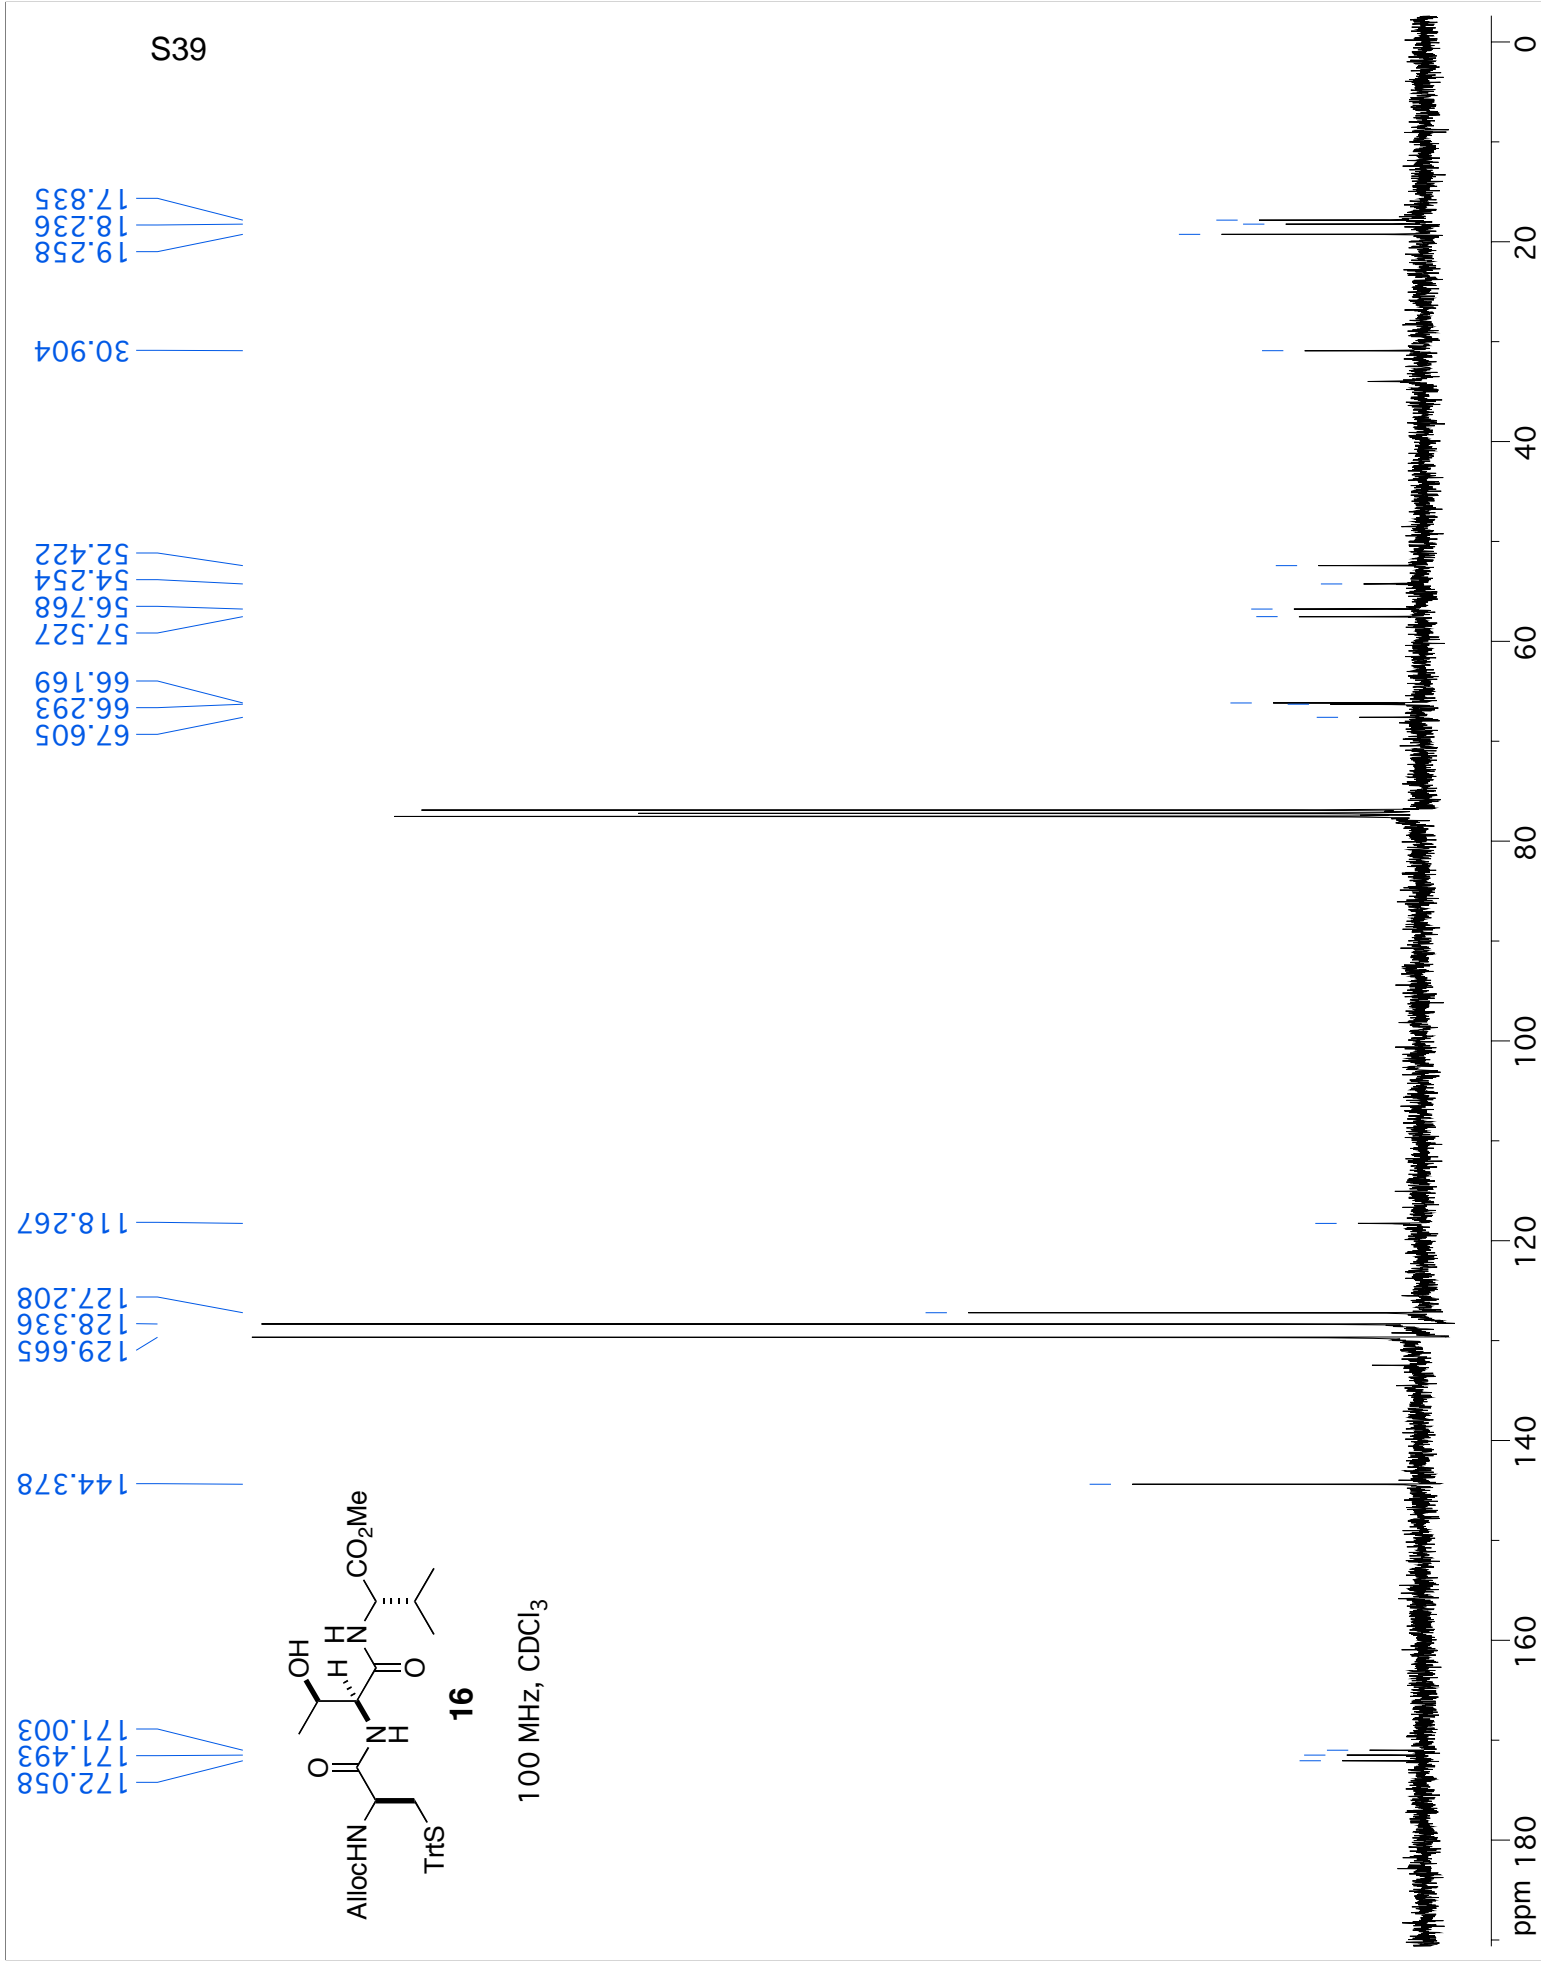

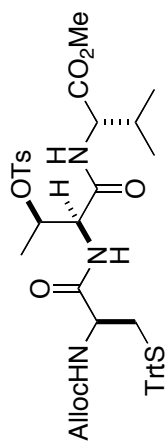**S-5**400 MHz, CDCl<sub>3</sub>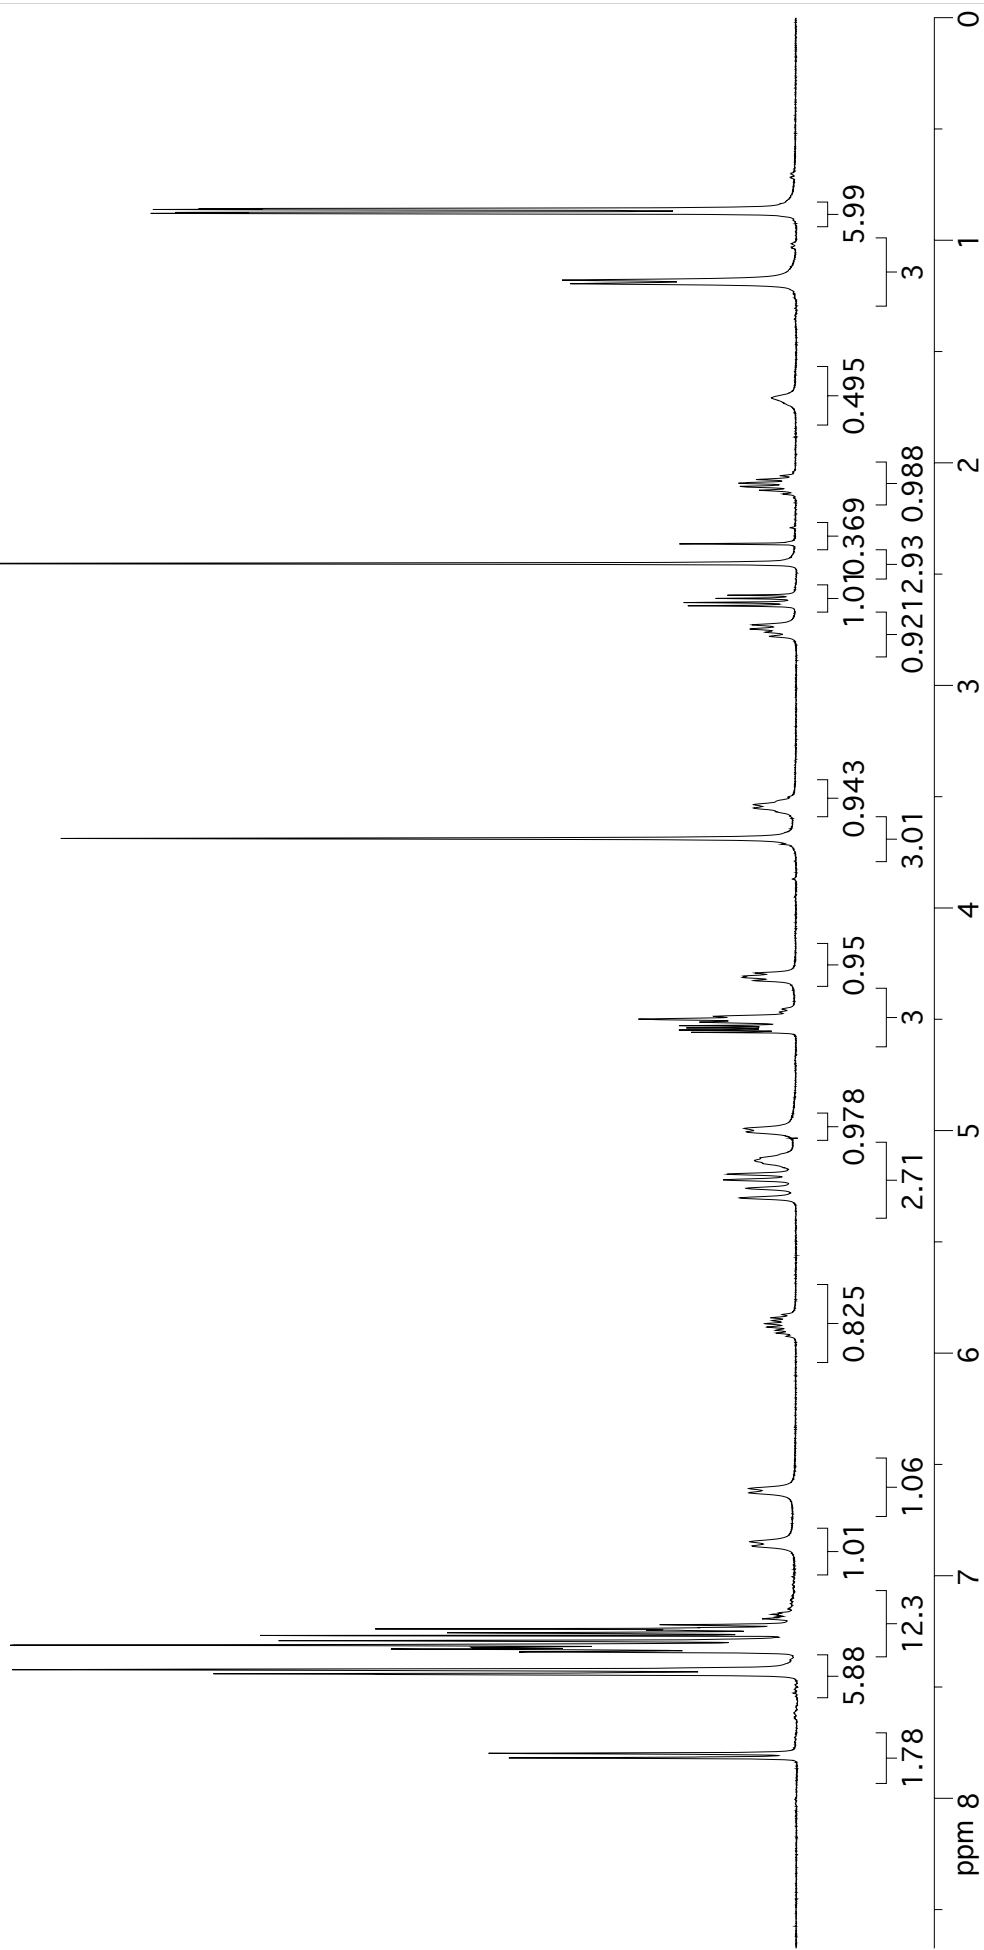



S41

21.899  
19.132  
18.165  
17.309

33.444  
30.850

57.991  
56.498  
54.437  
52.277

66.383  
67.642  
76.895  
77.131  
77.218  
77.421  
77.531

118.246

127.225  
128.277  
128.367

130.063  
132.520  
133.452

144.377  
145.286

171.634  
170.761  
167.427

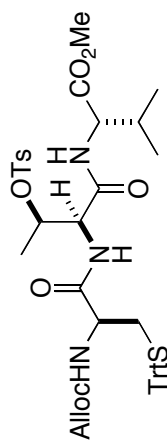

S-5

100 MHz, CDCl<sub>3</sub>

ppm 180 160 140 120 100 80 60 40 20 0

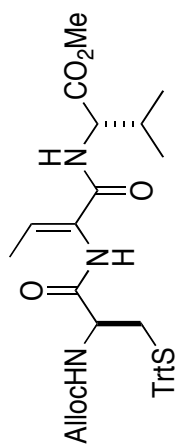

17

400 MHz, CDCl<sub>3</sub>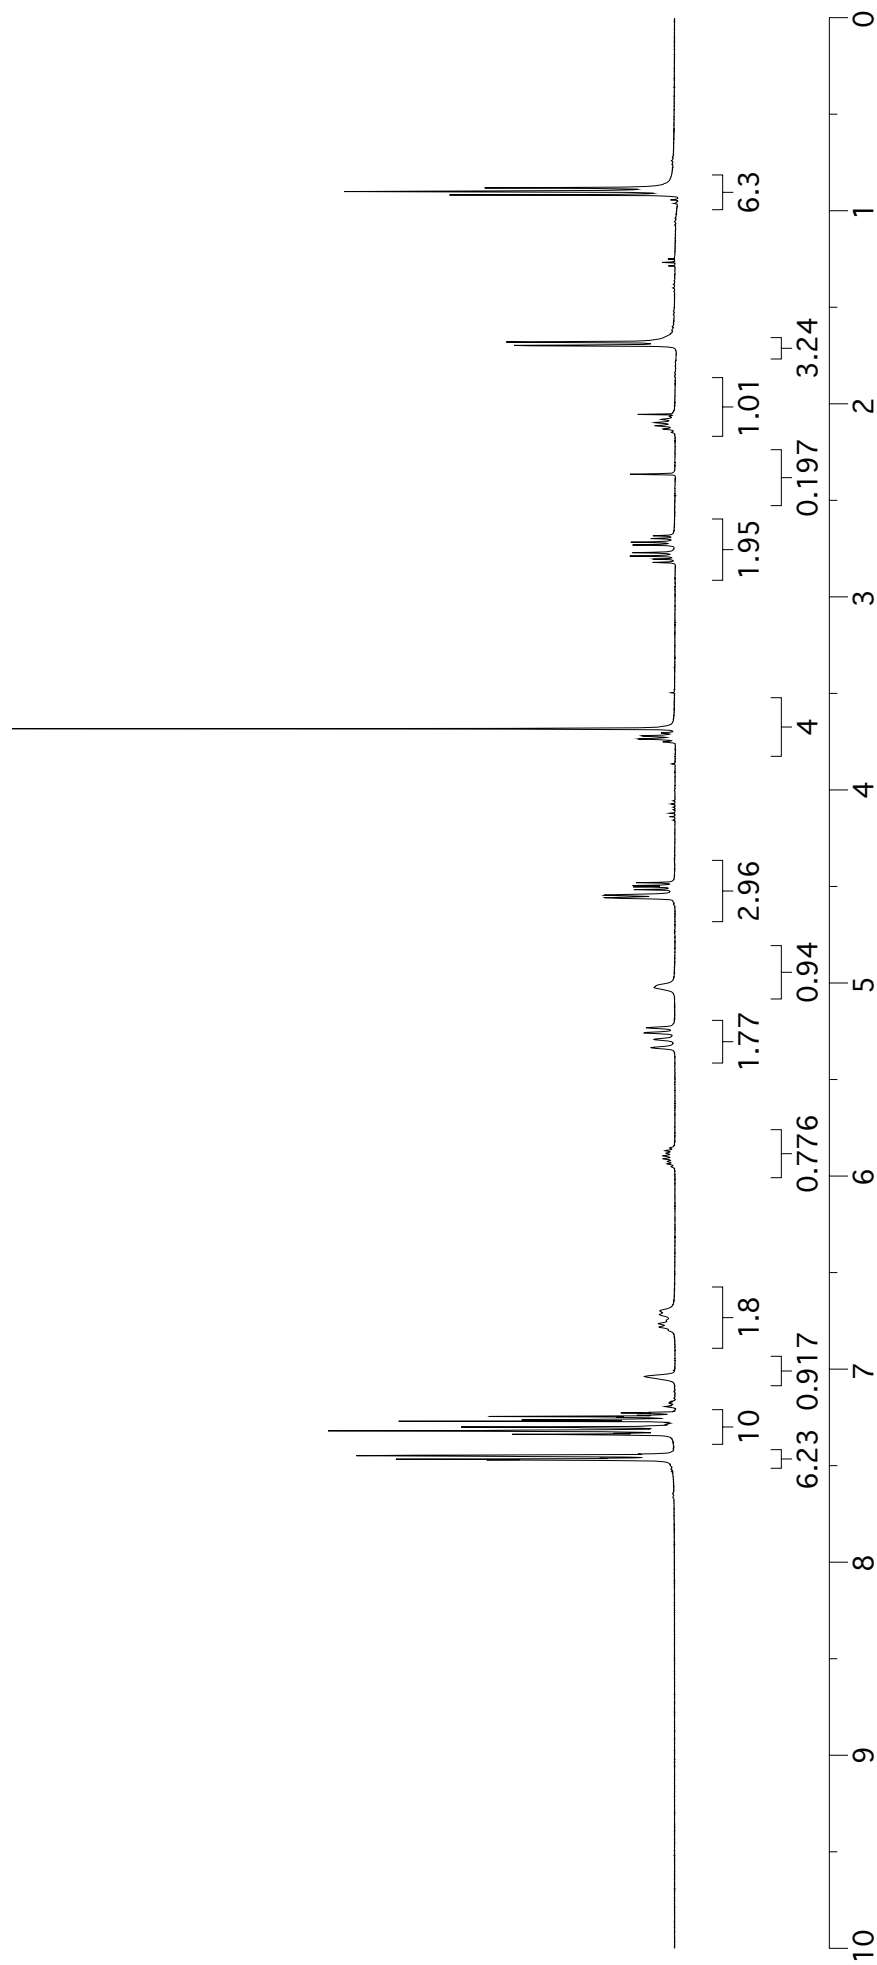

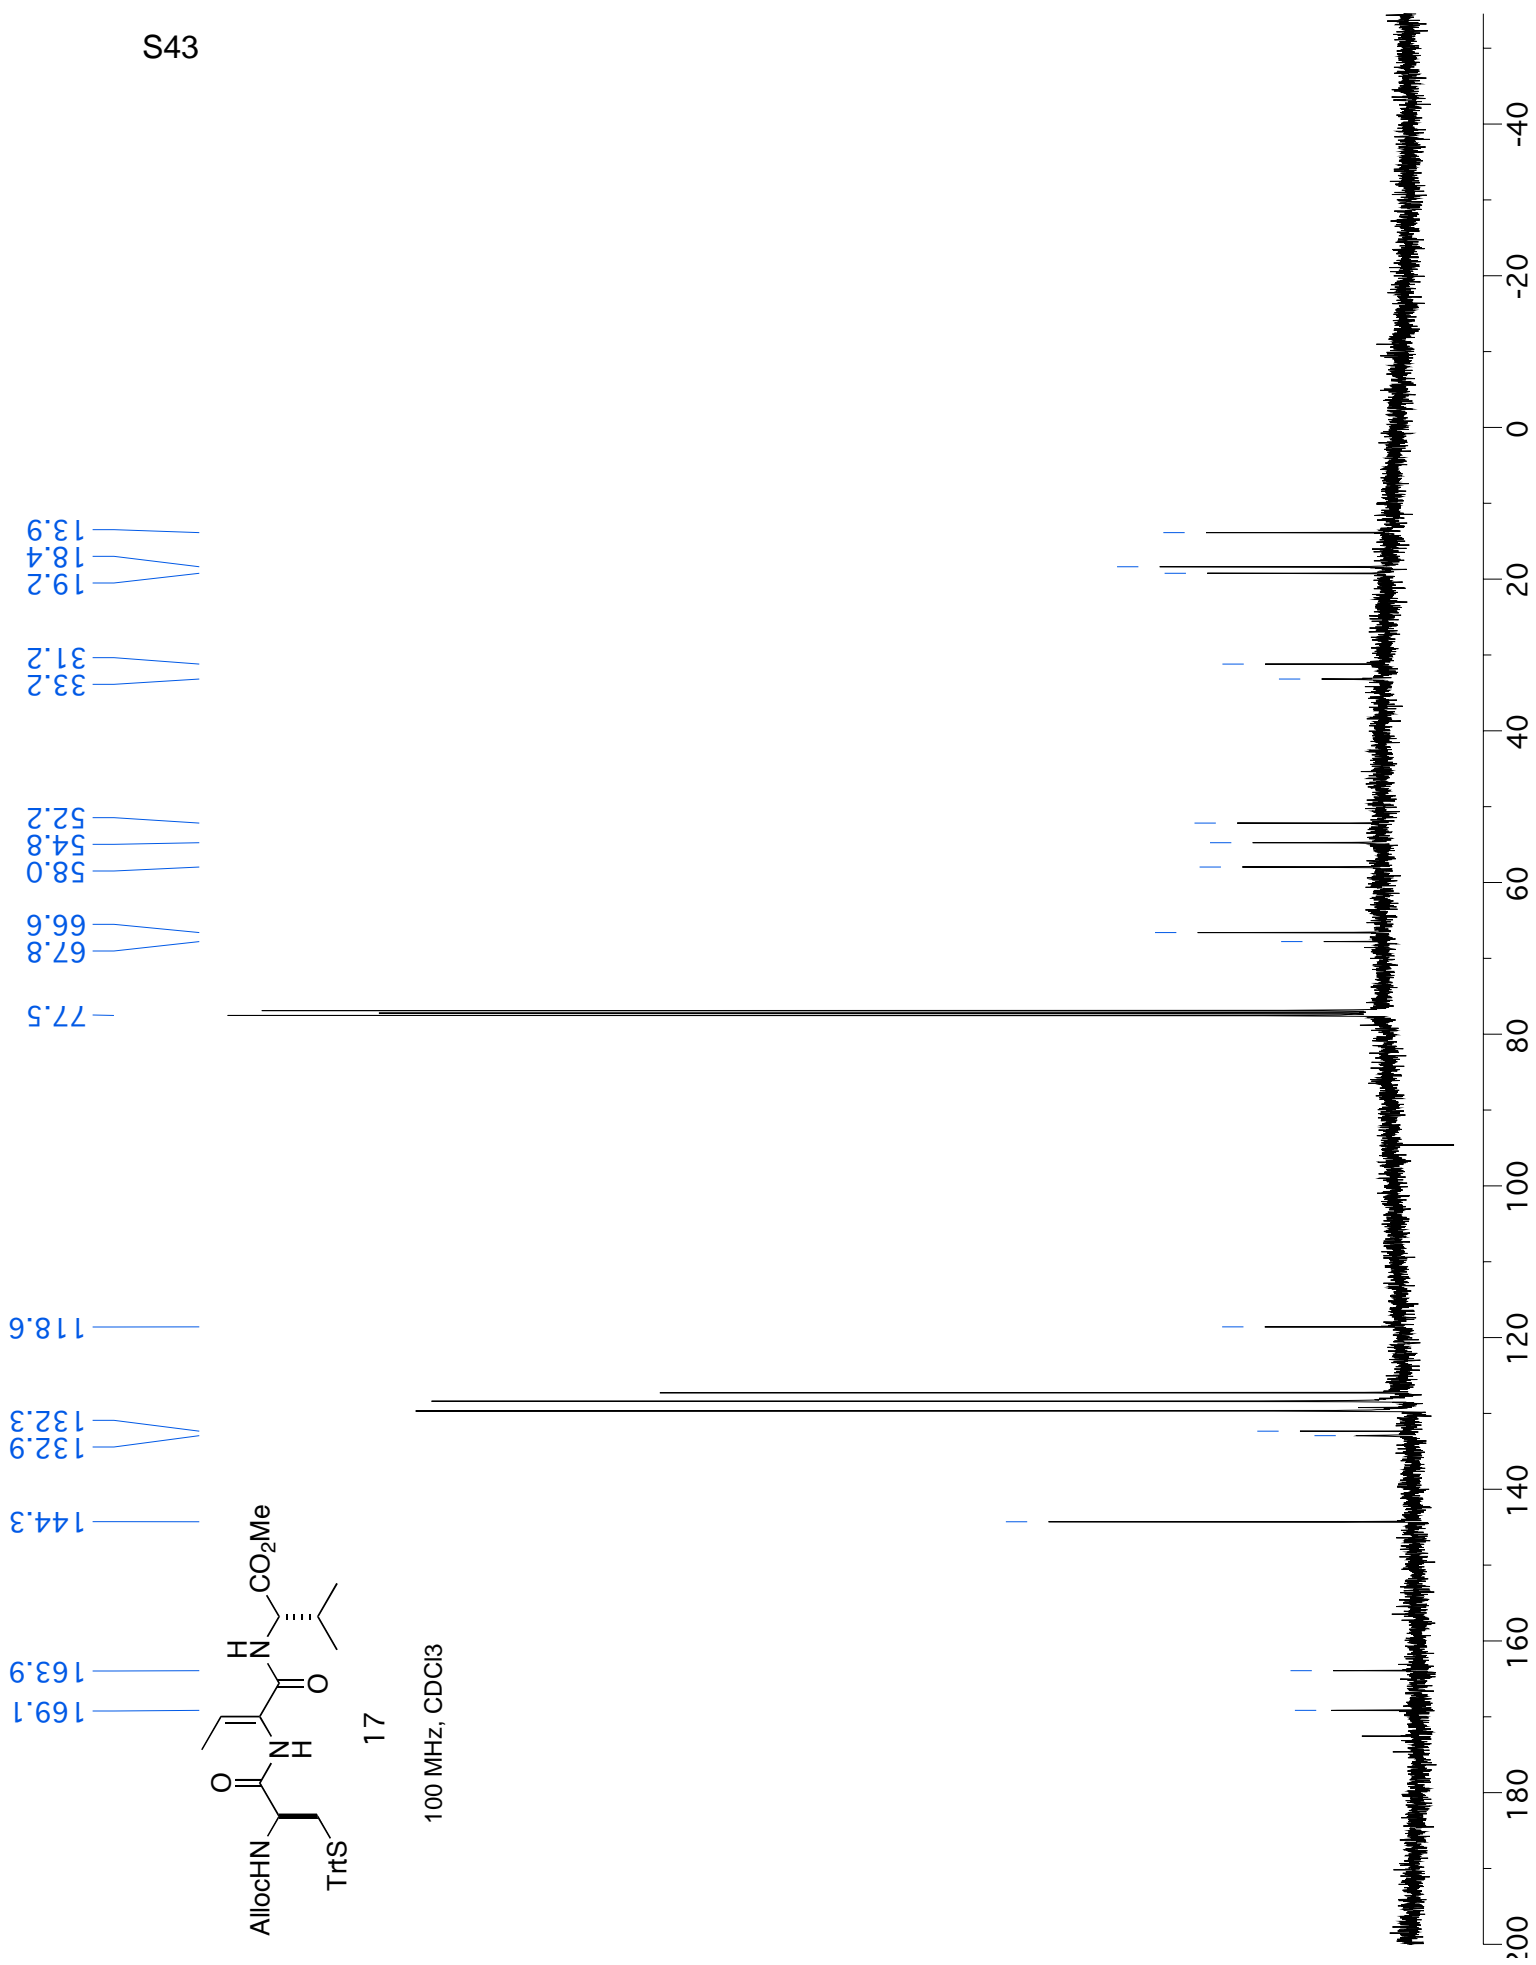

13.9  
18.4  
19.2

31.2  
33.2

52.2  
54.8  
58.0

66.6  
67.8

77.5

118.6

132.3  
132.9

144.3

163.9  
169.1

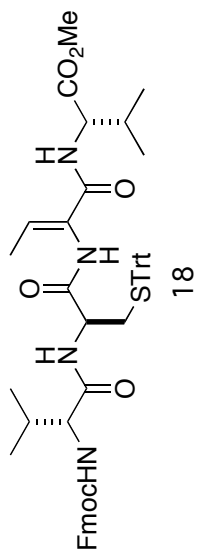

18

400 MHz, CDCl<sub>3</sub>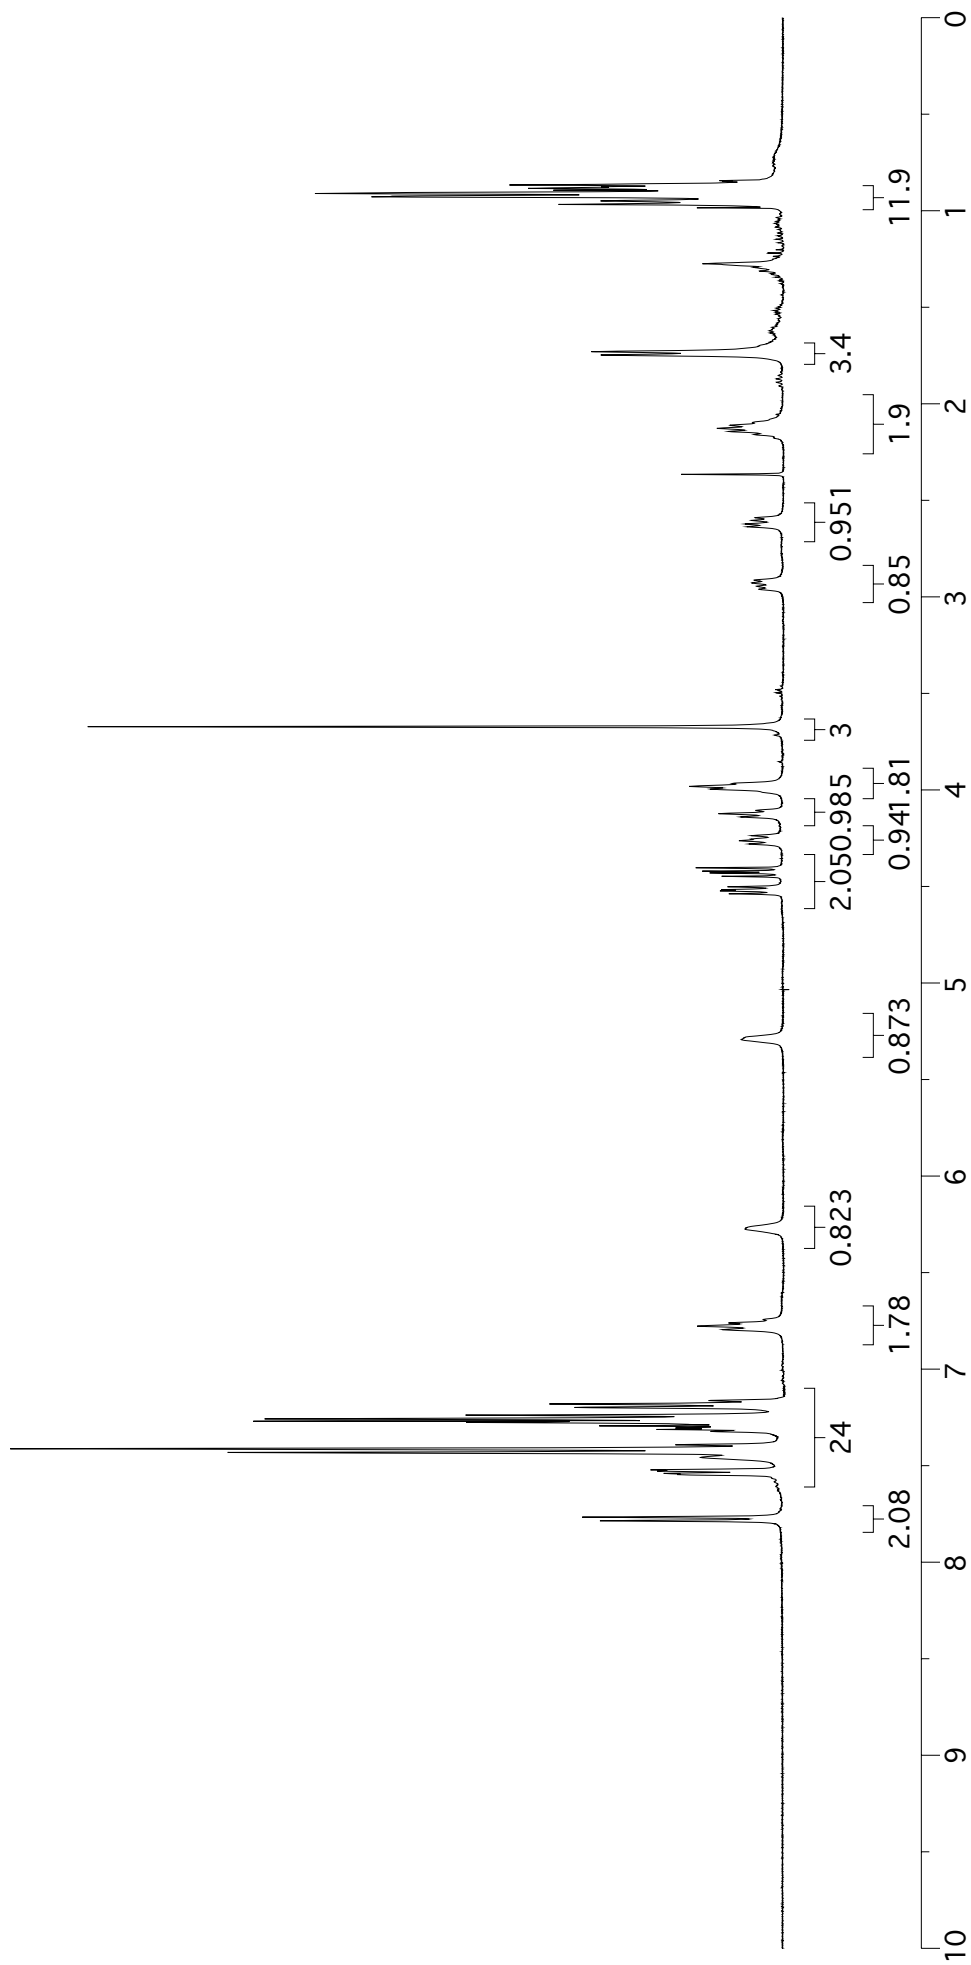

S45

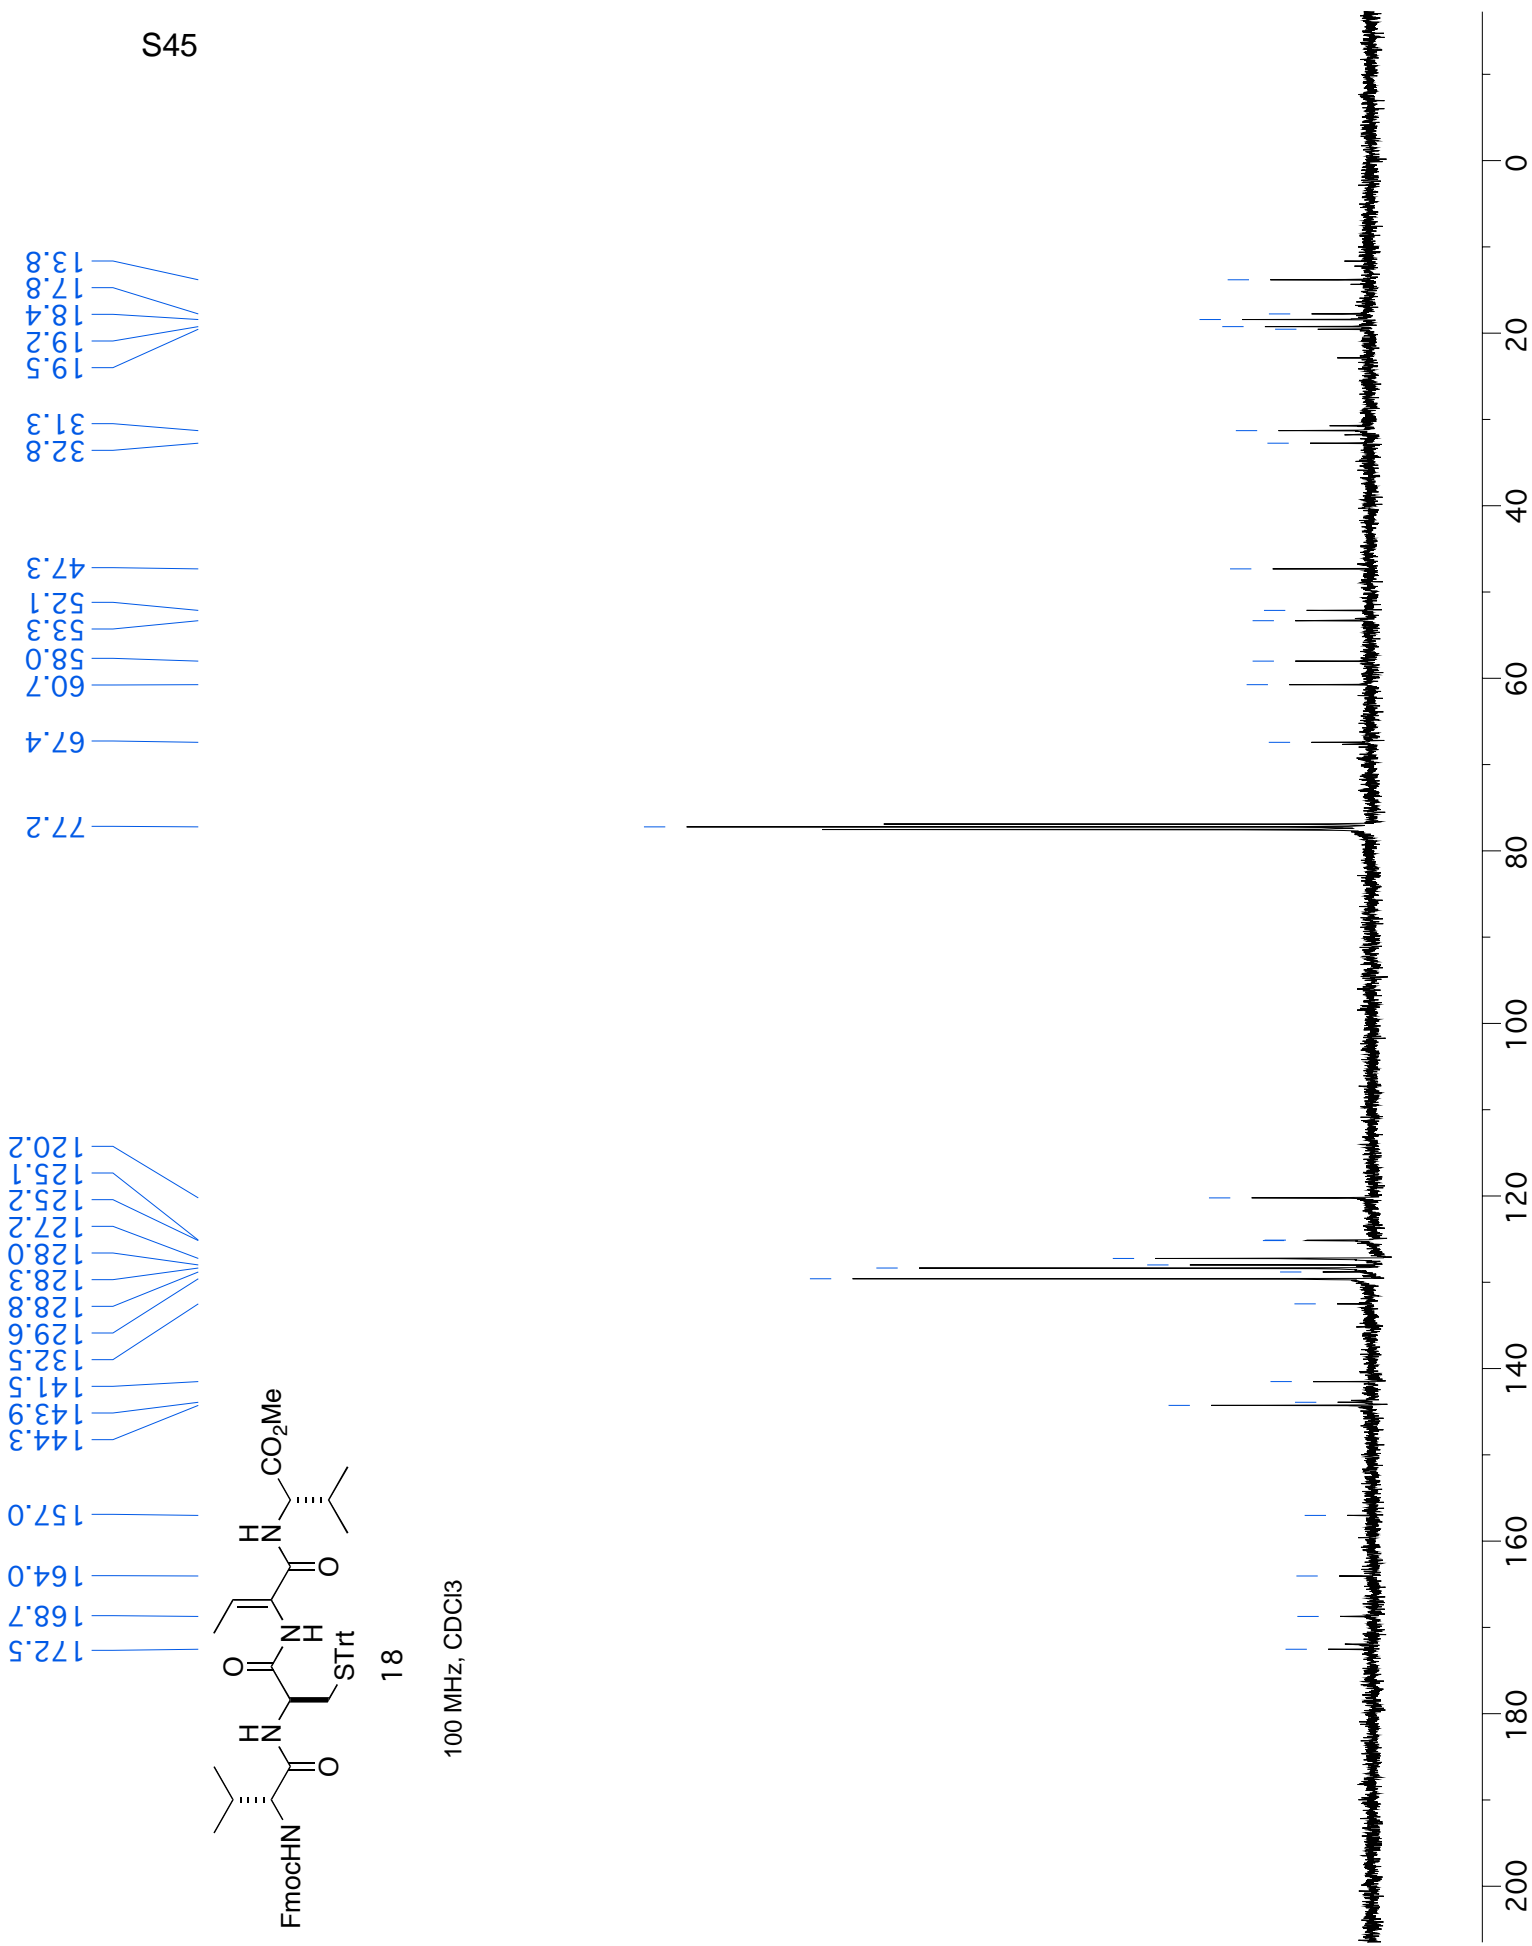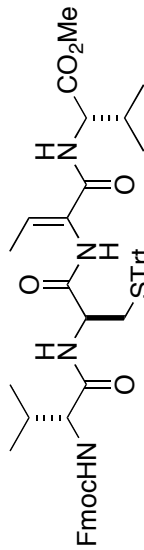

18

100 MHz, CDCl3

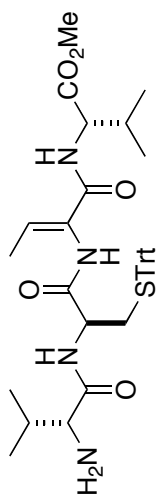

4

400 MHz, CDCl<sub>3</sub>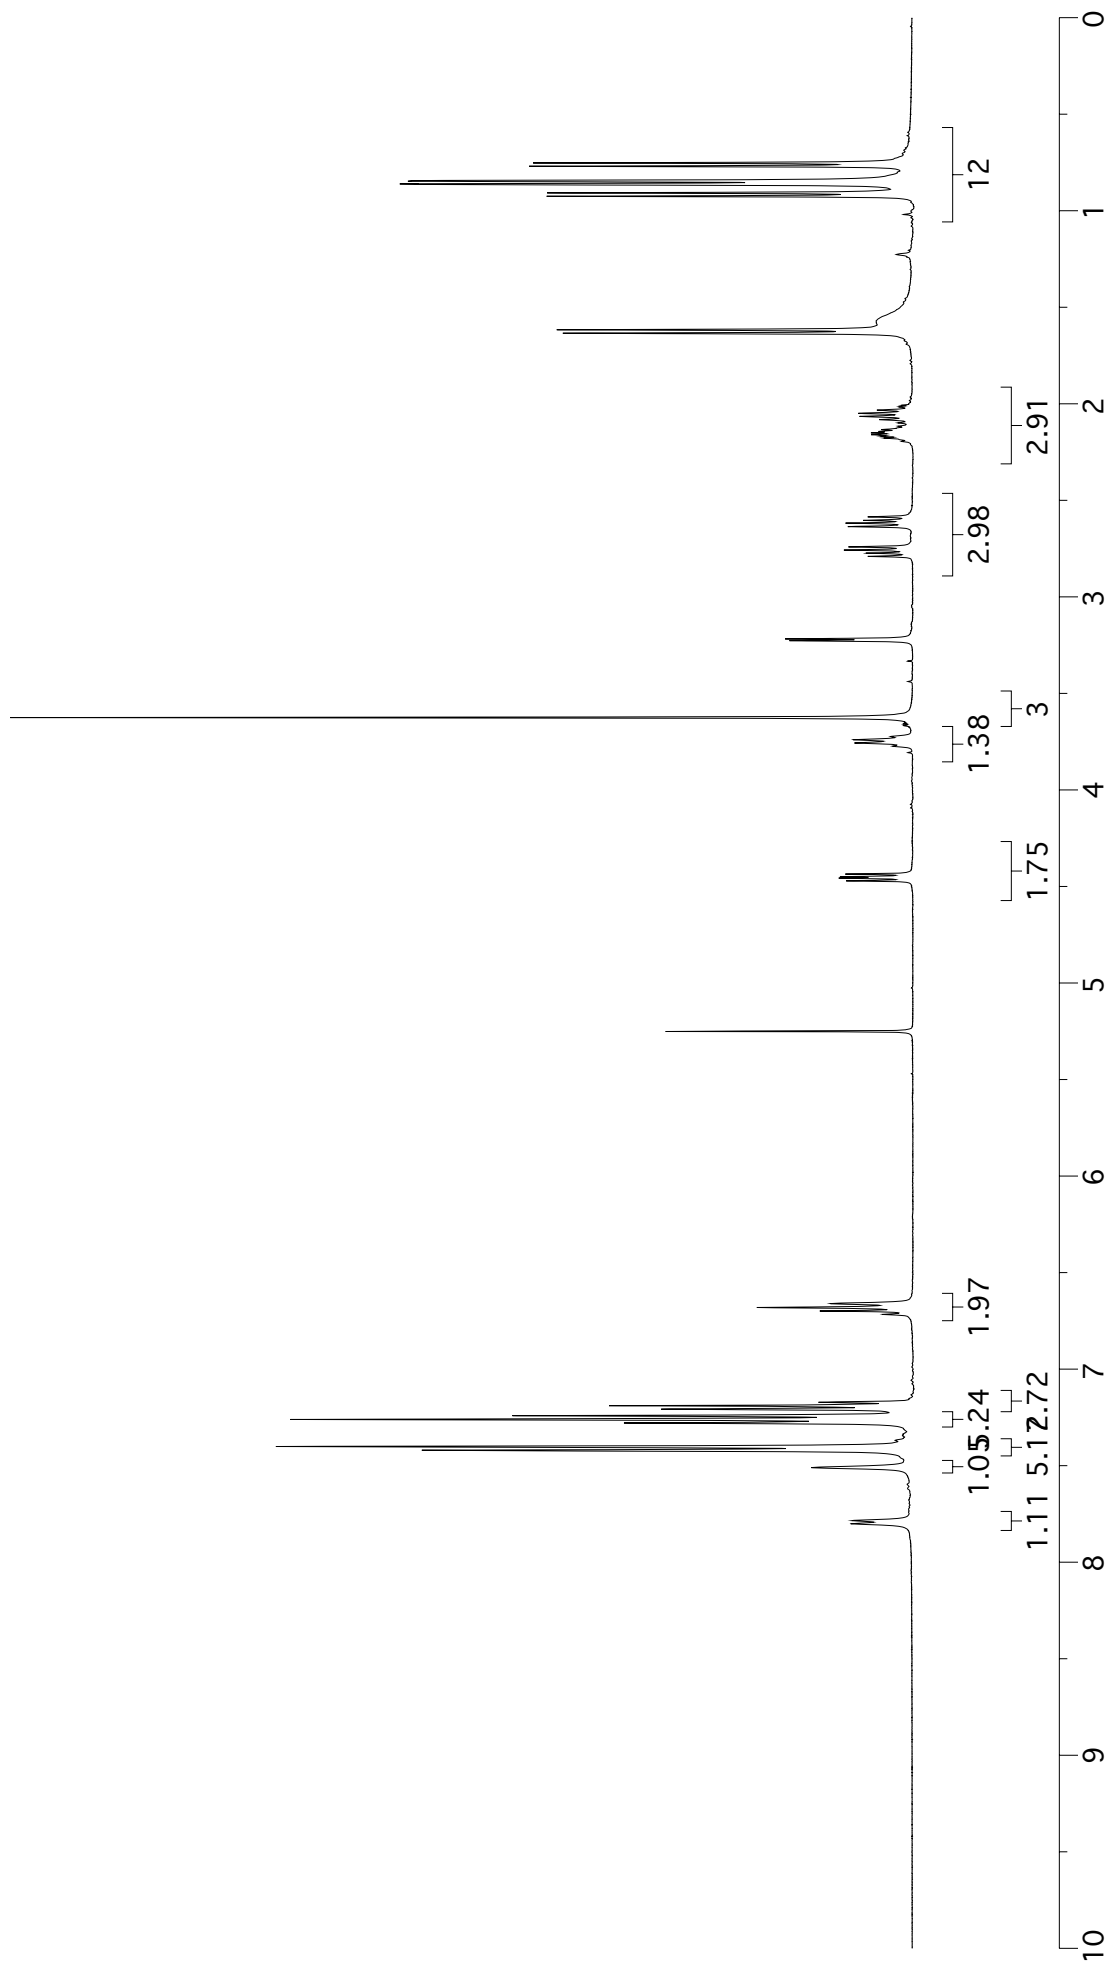

S47

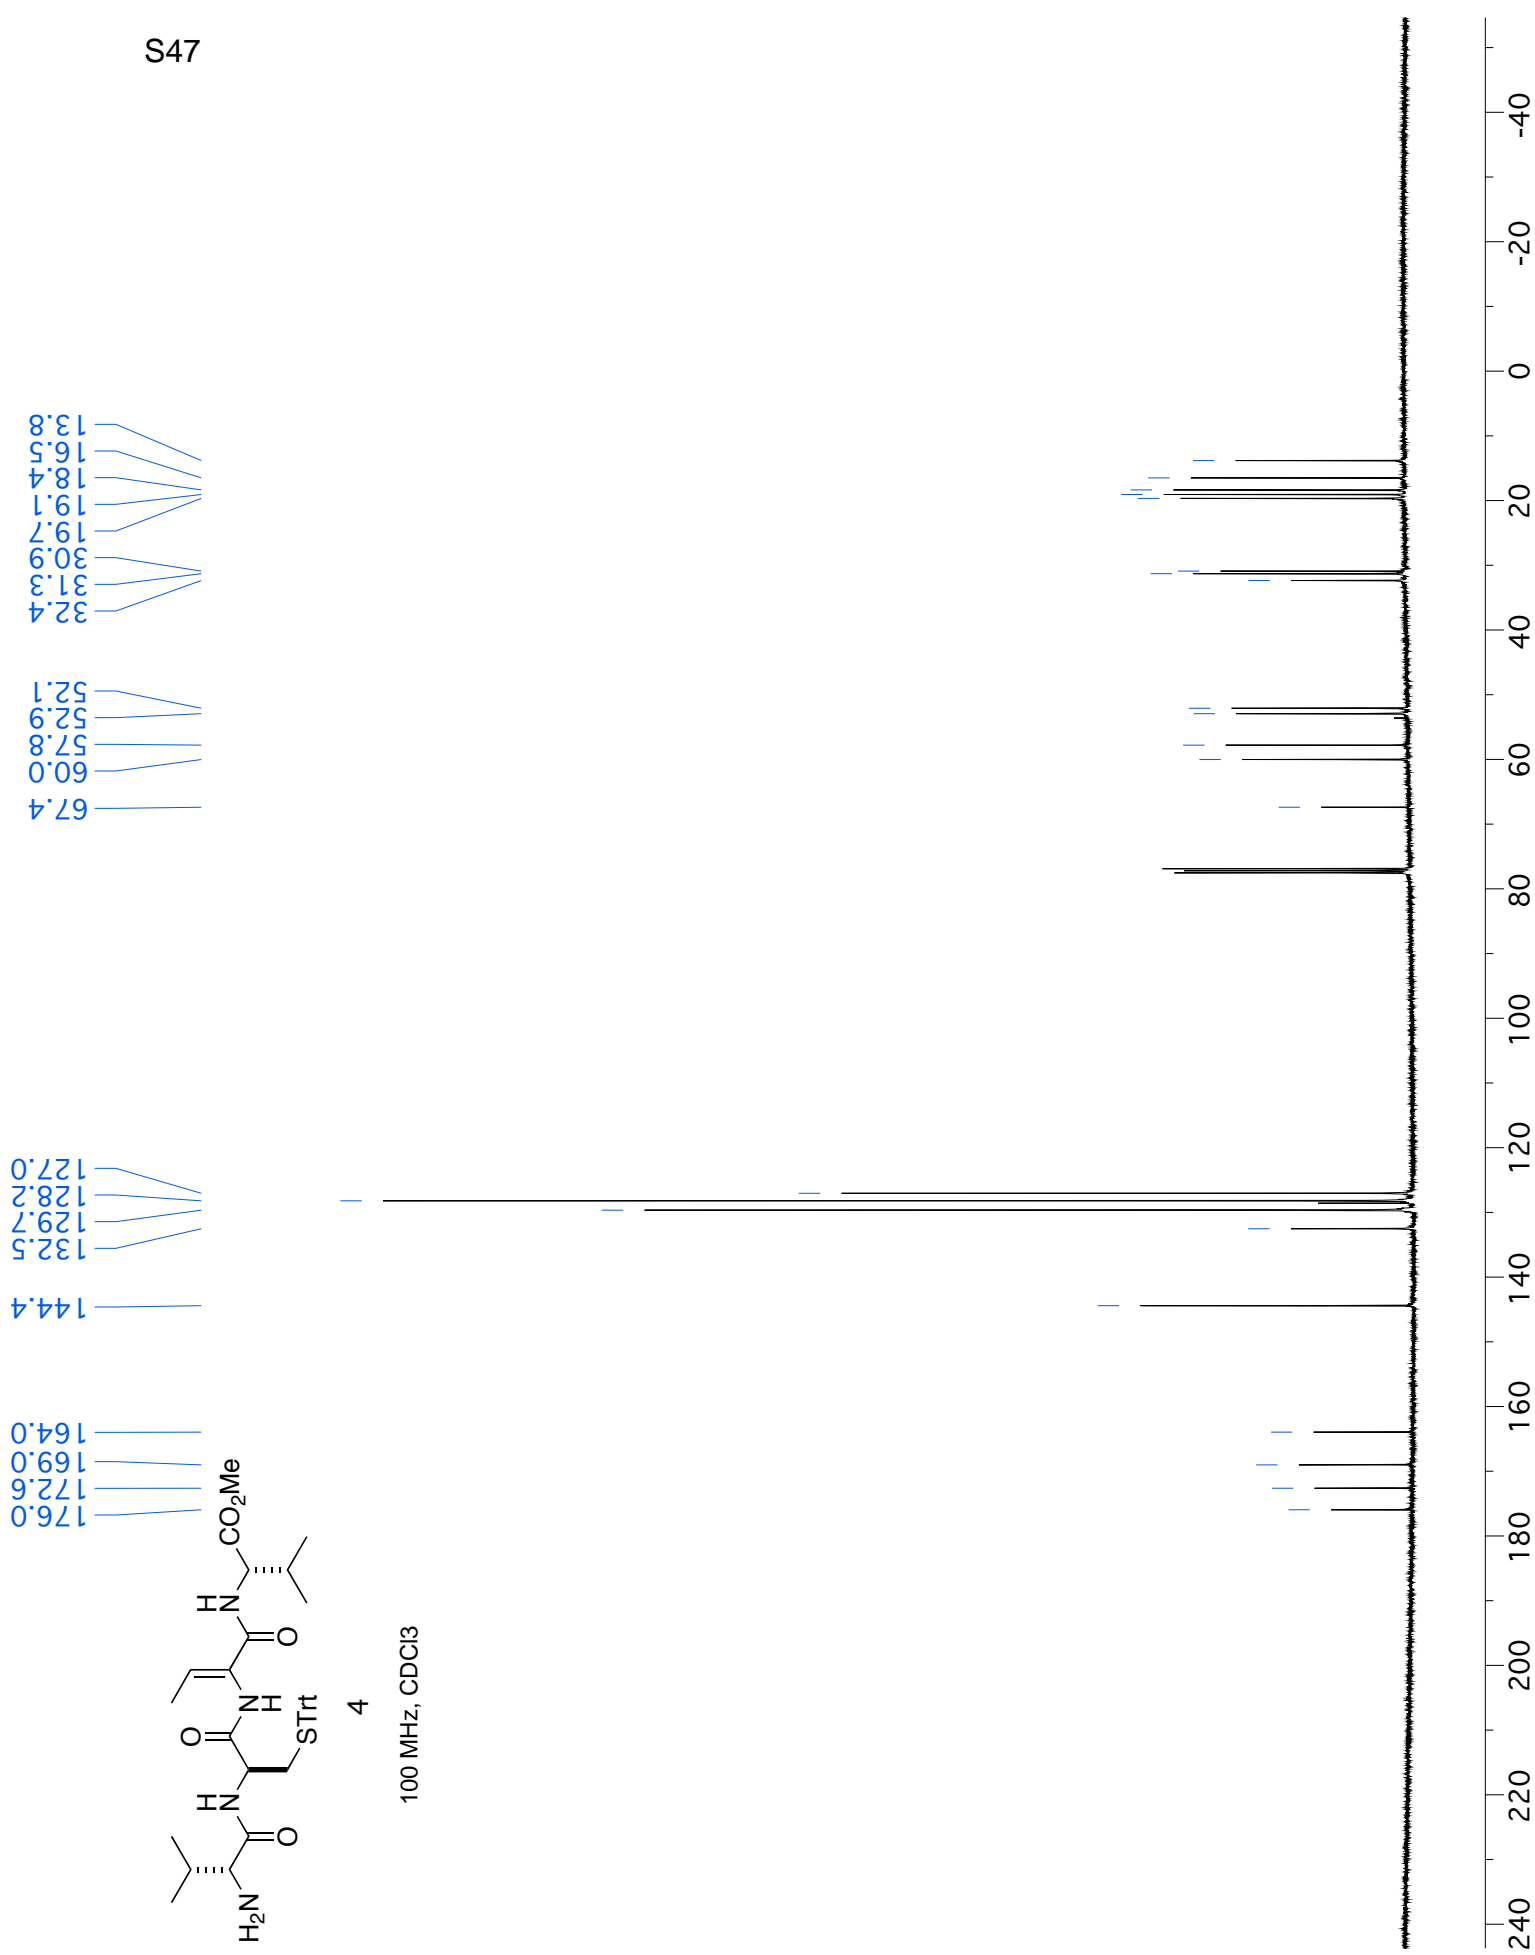

400 MHz, CDCl<sub>3</sub>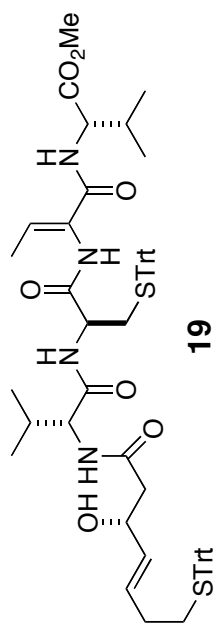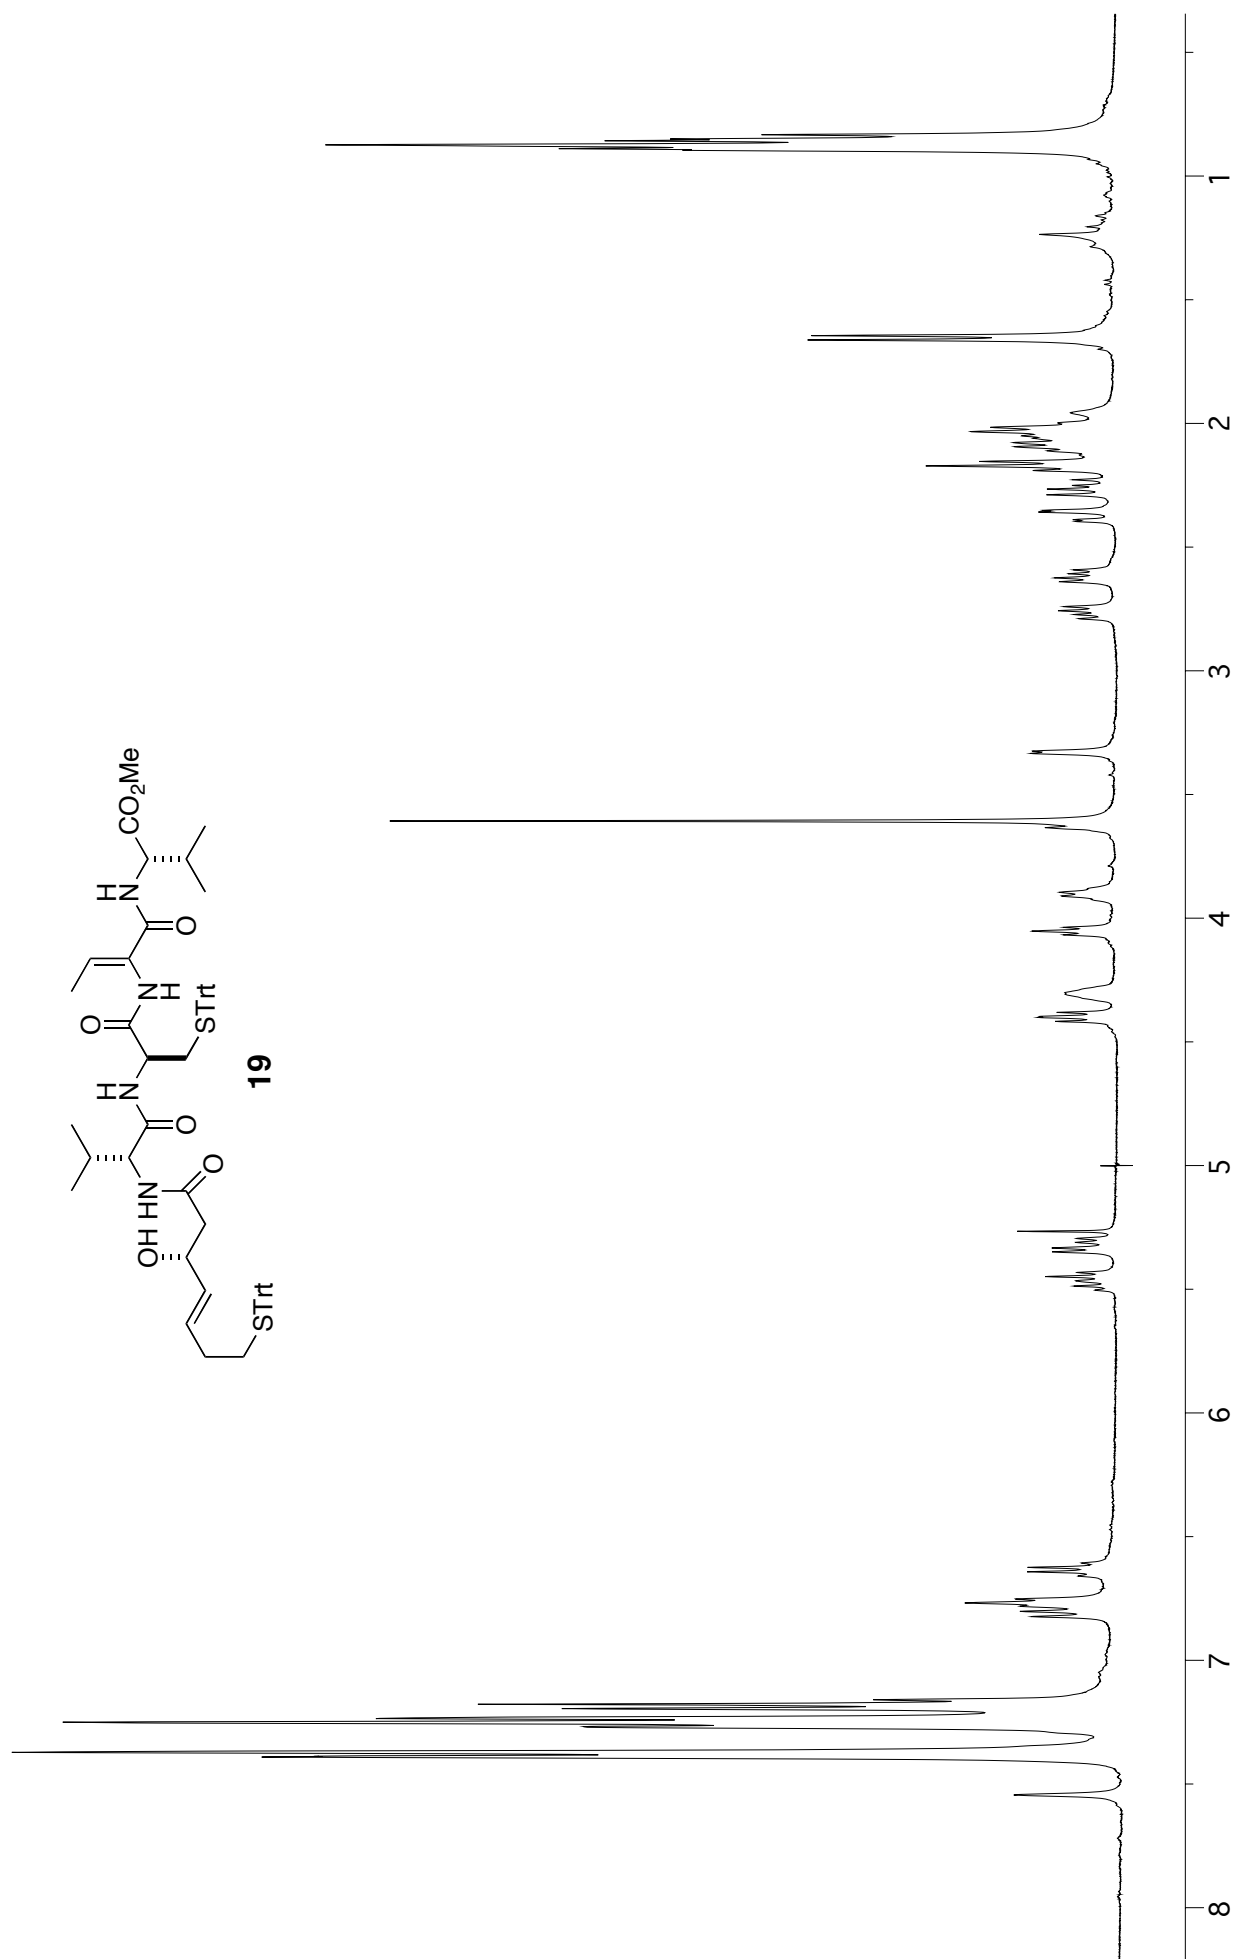



100 MHz, CDCl<sub>3</sub>

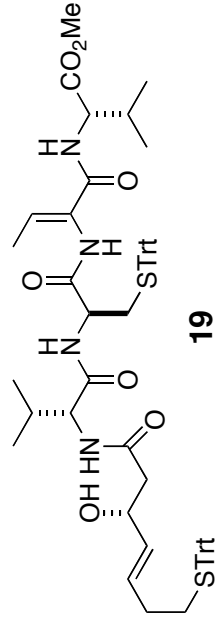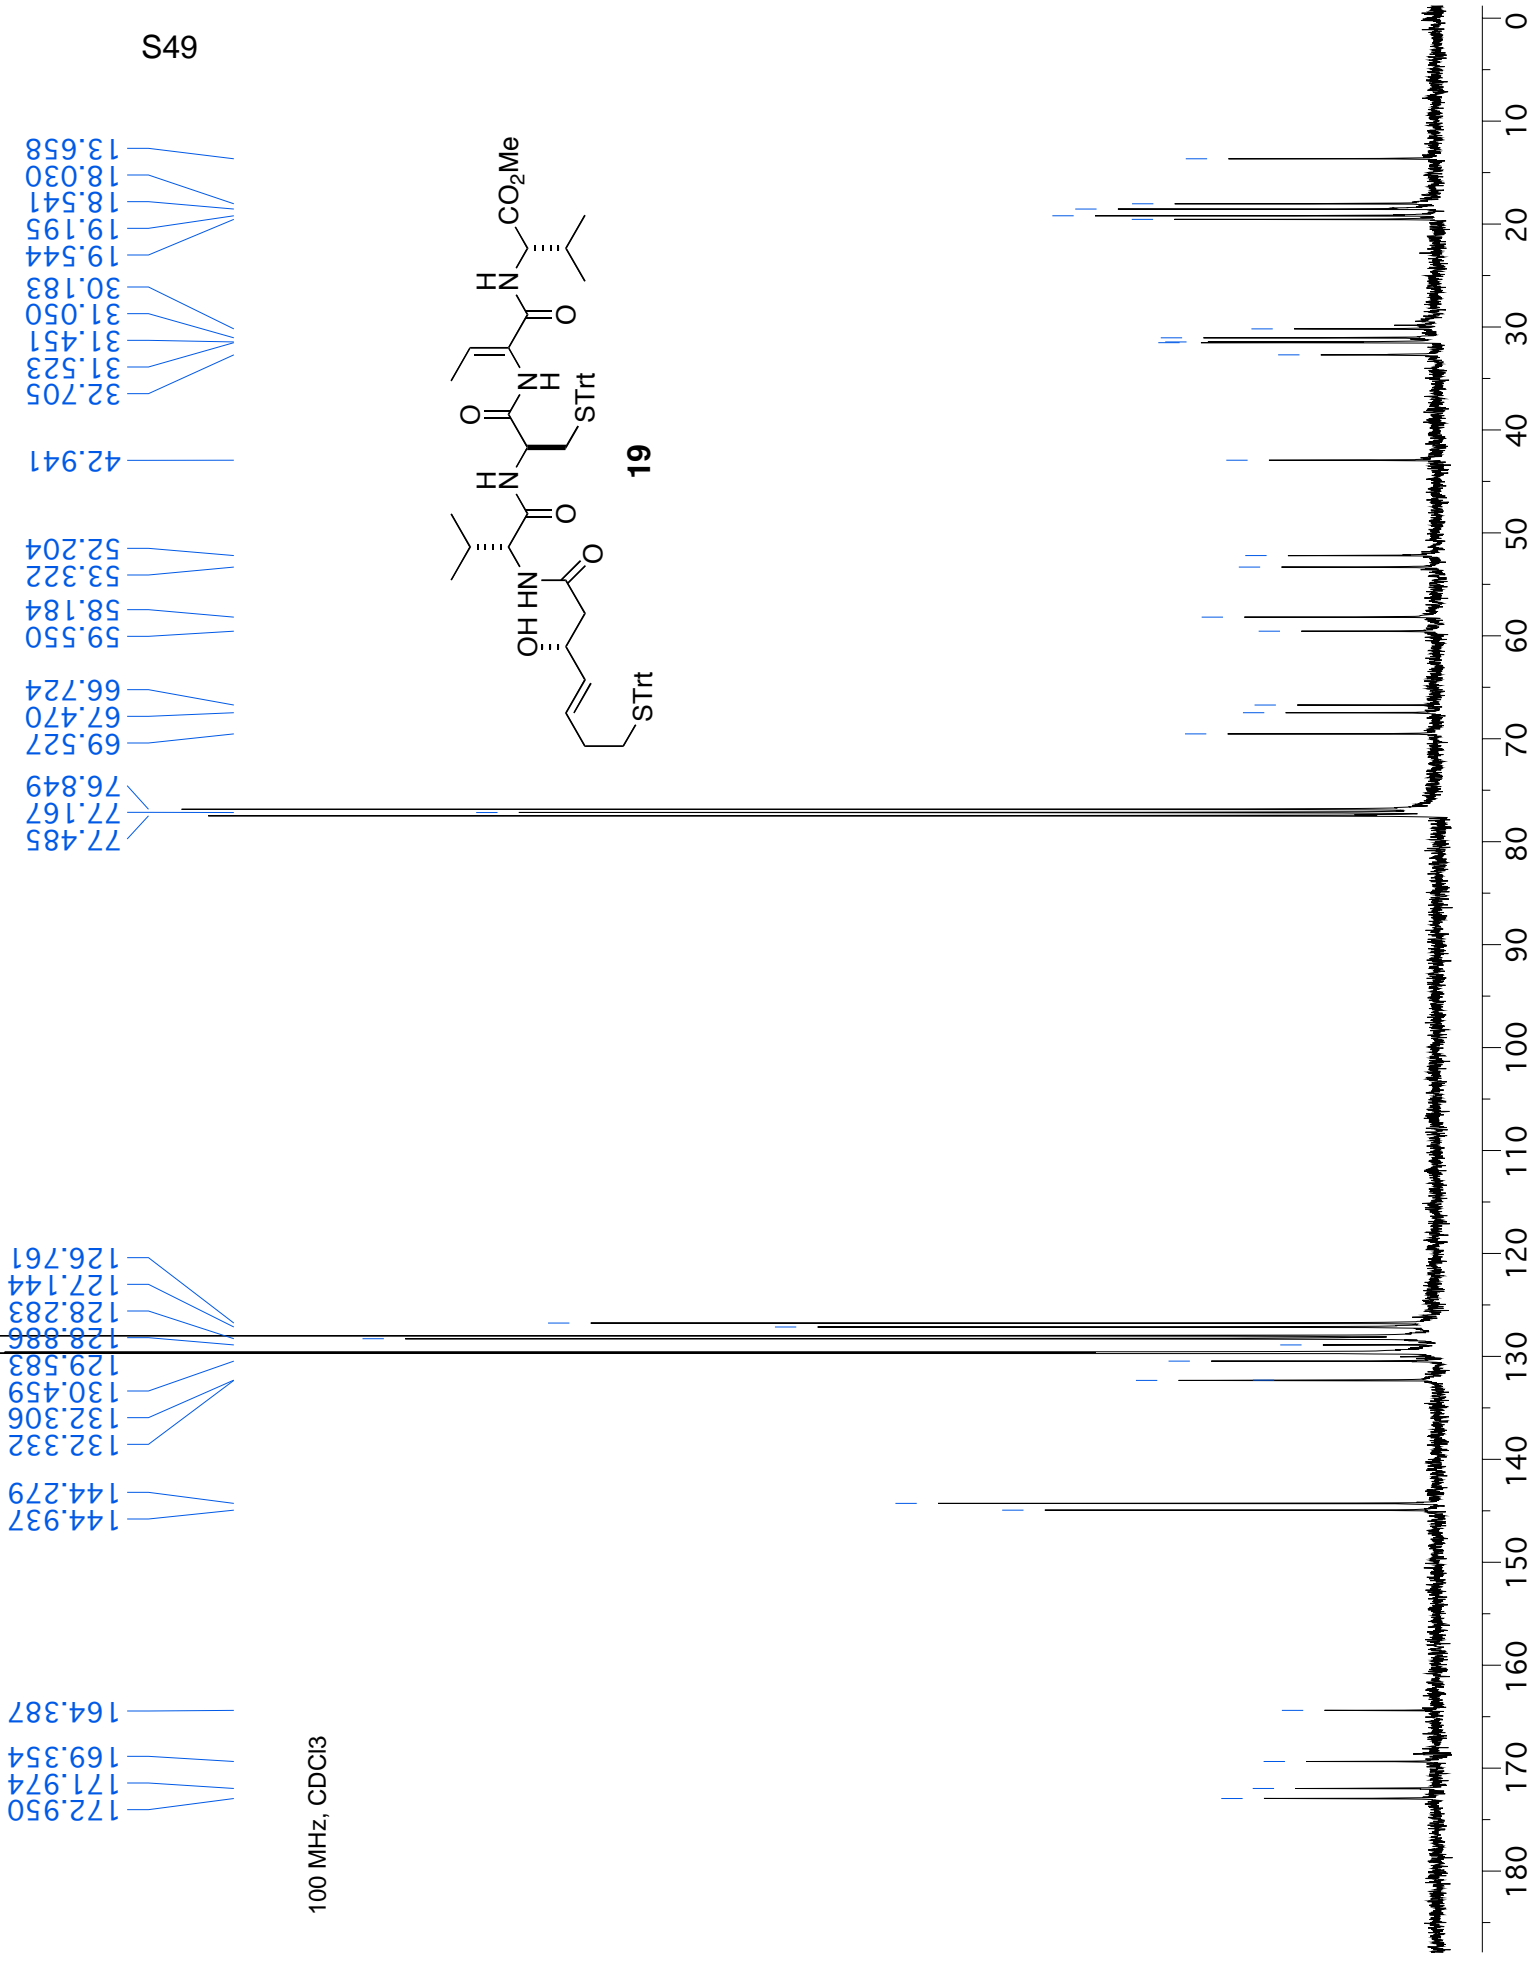

S49

S50

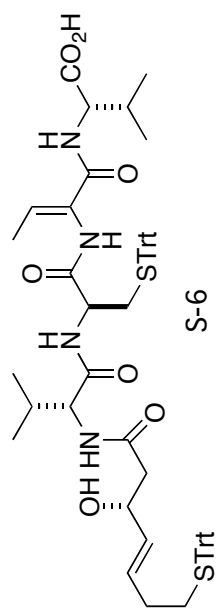

400 MHz, CDCl<sub>3</sub>

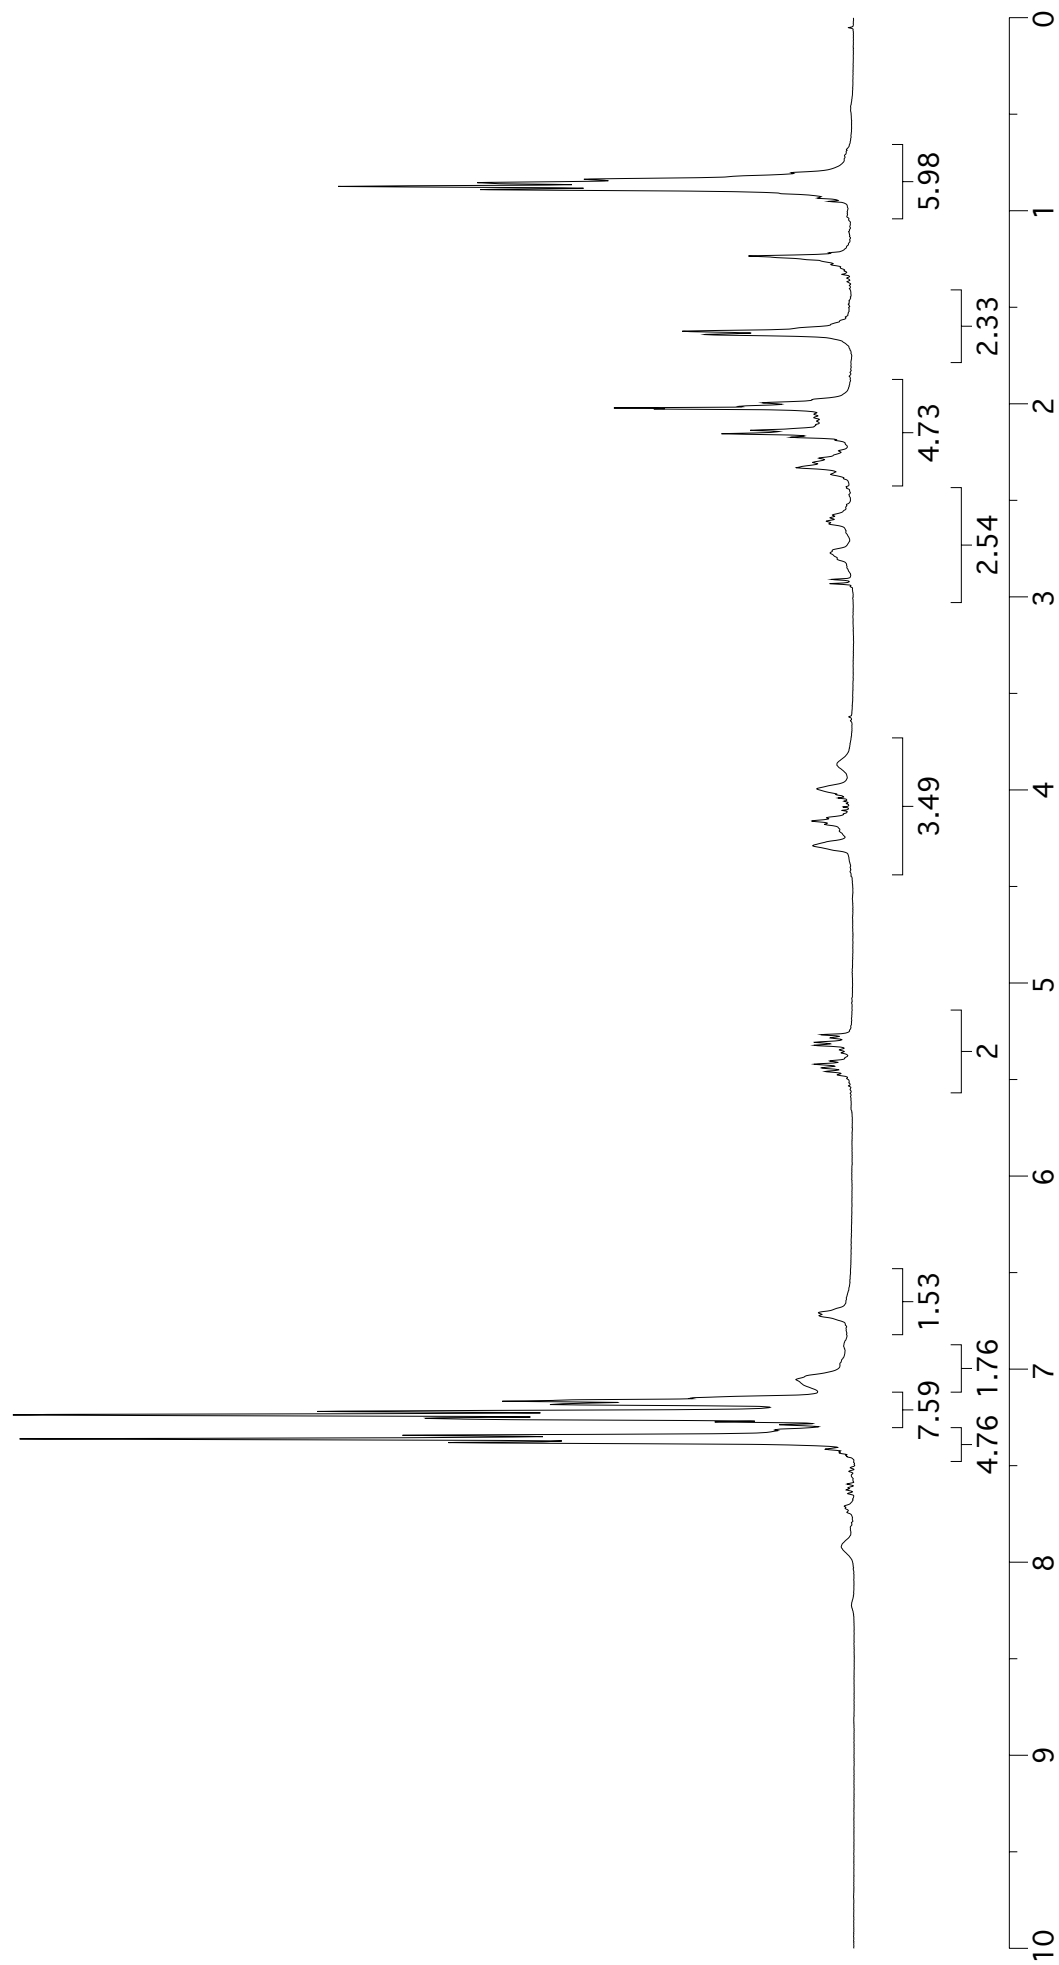

S51

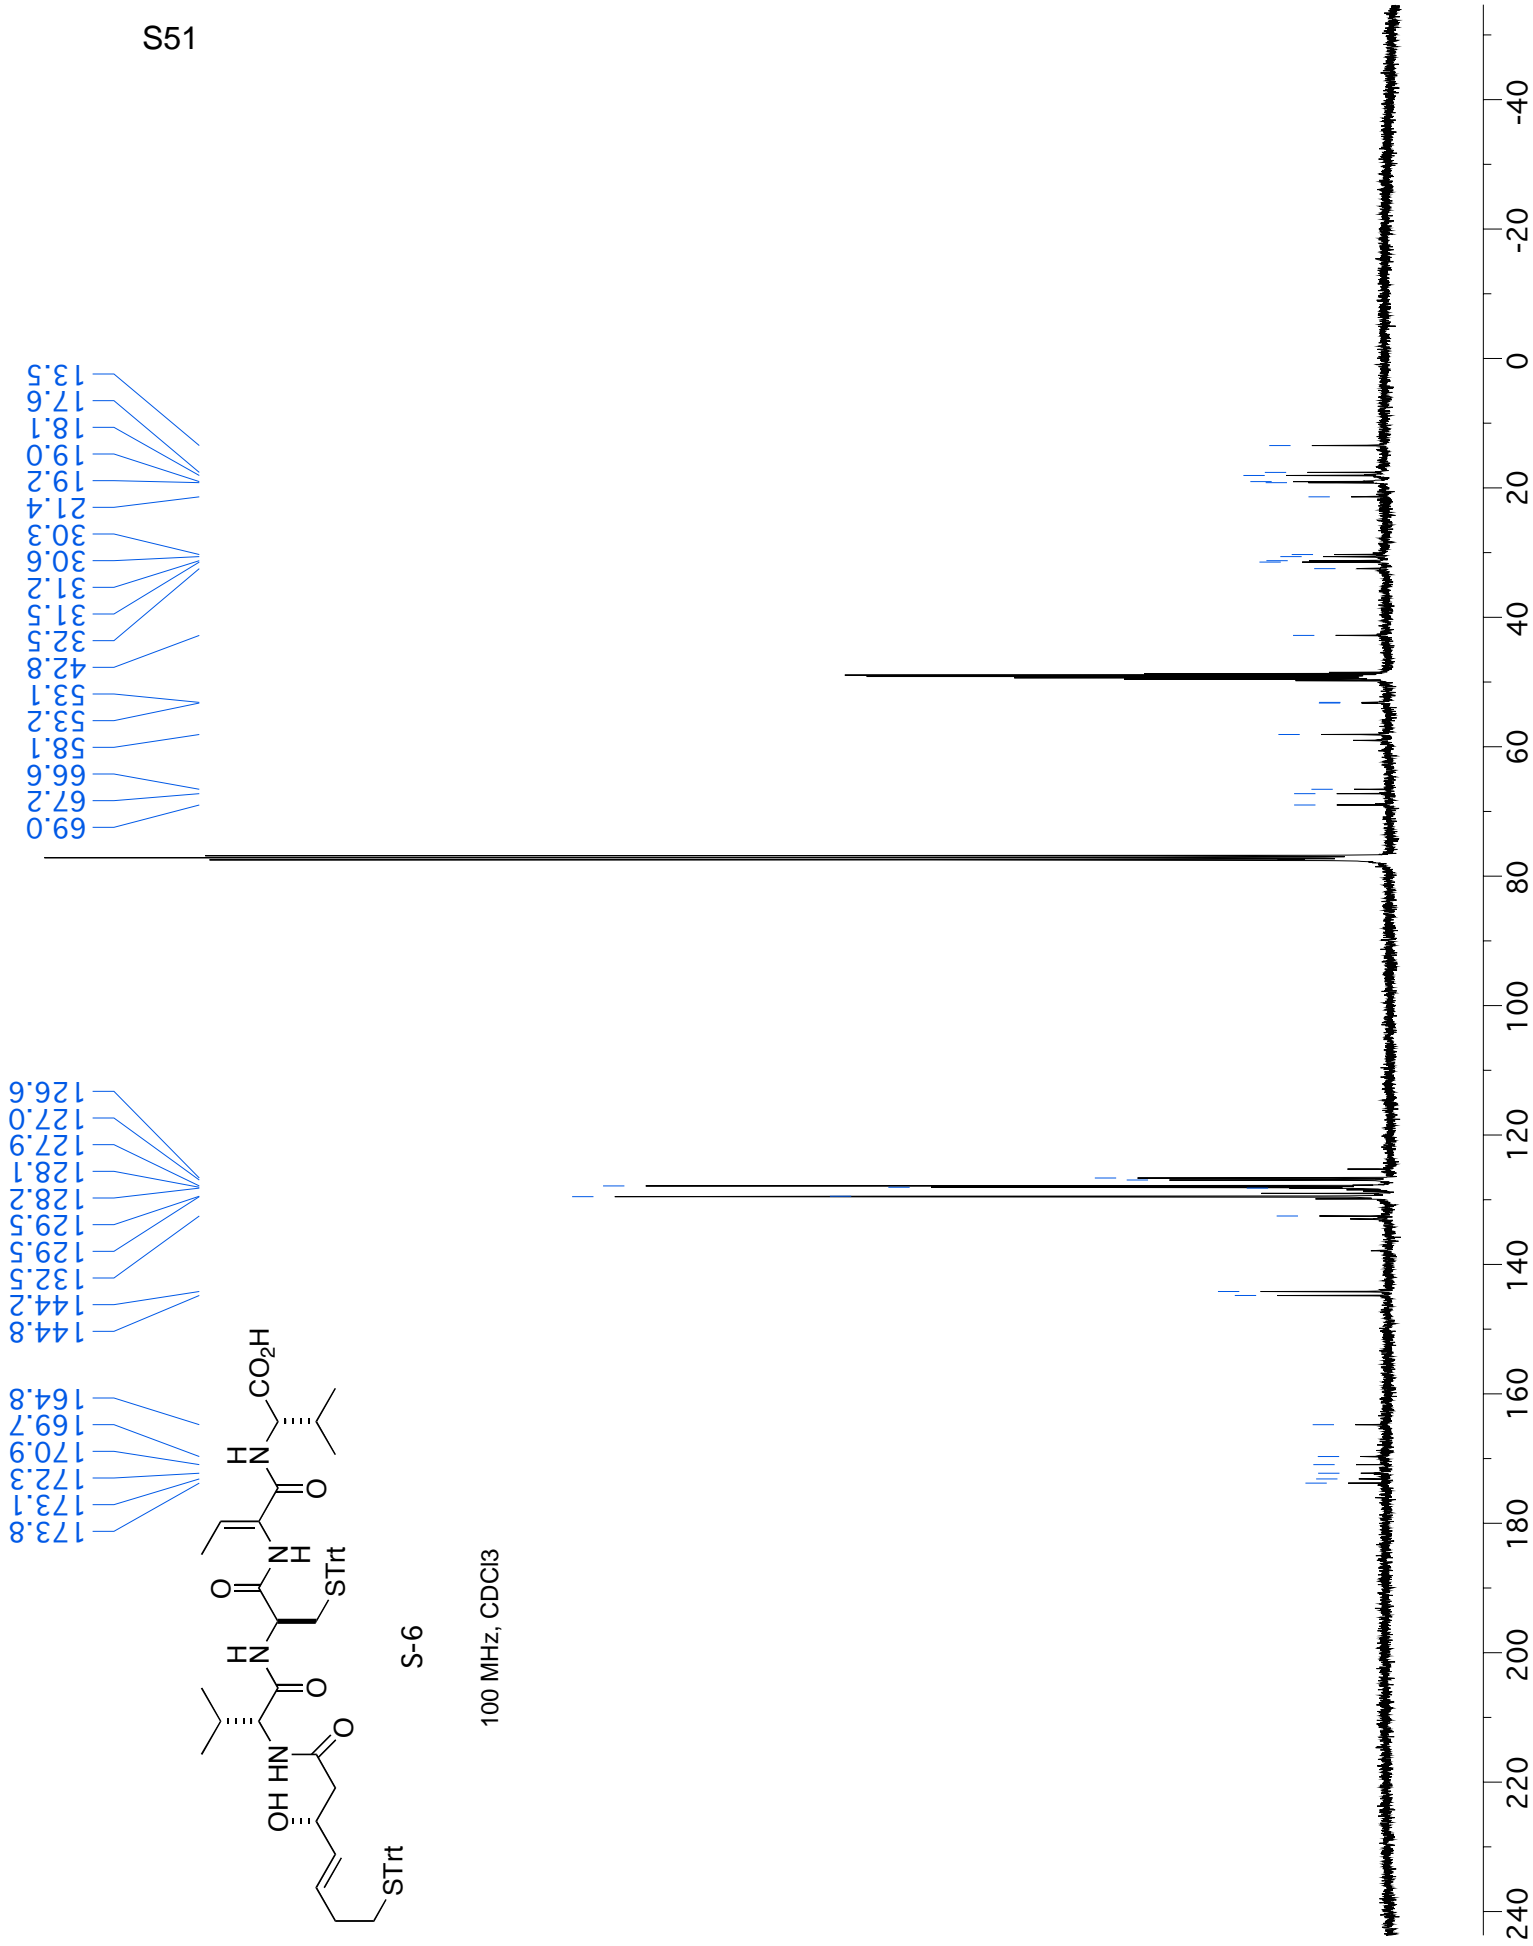

400 MHz, CDCl<sub>3</sub> :  
CD<sub>3</sub>OD (10 : 1)

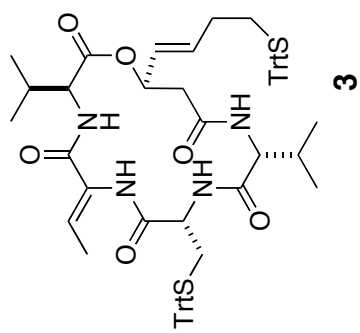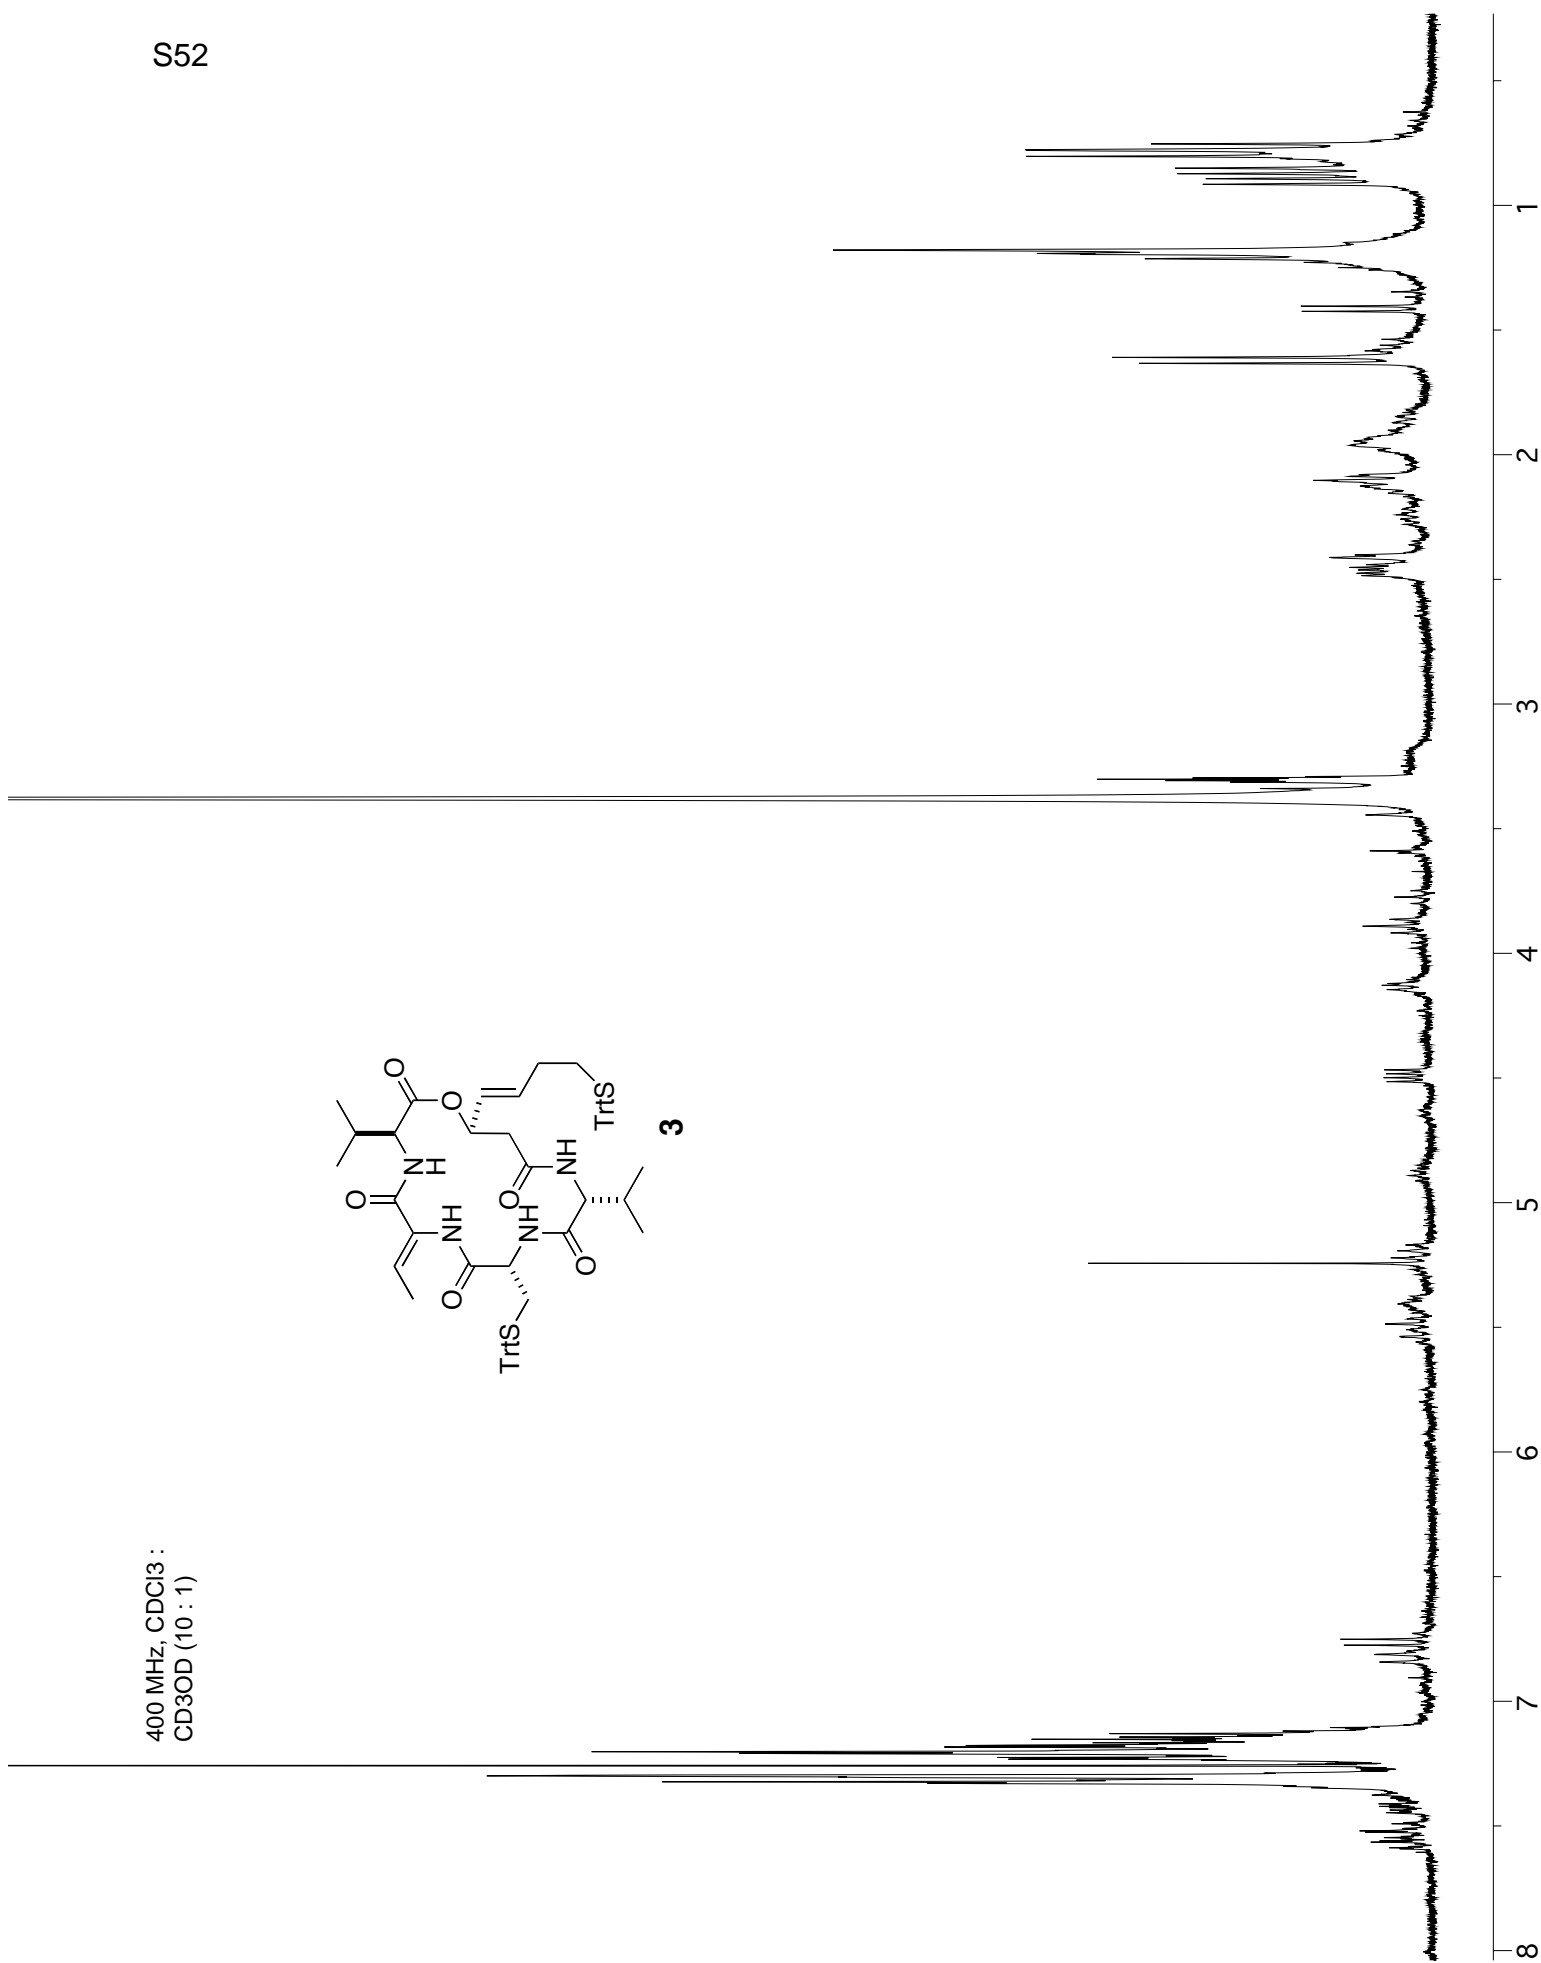

400 MHz, CDCl<sub>3</sub> :  
CD<sub>3</sub>OD (10 : 1)

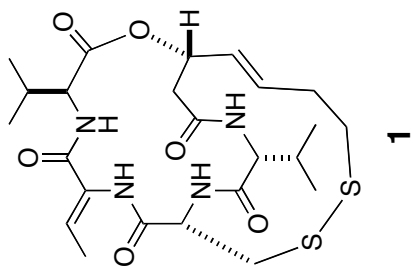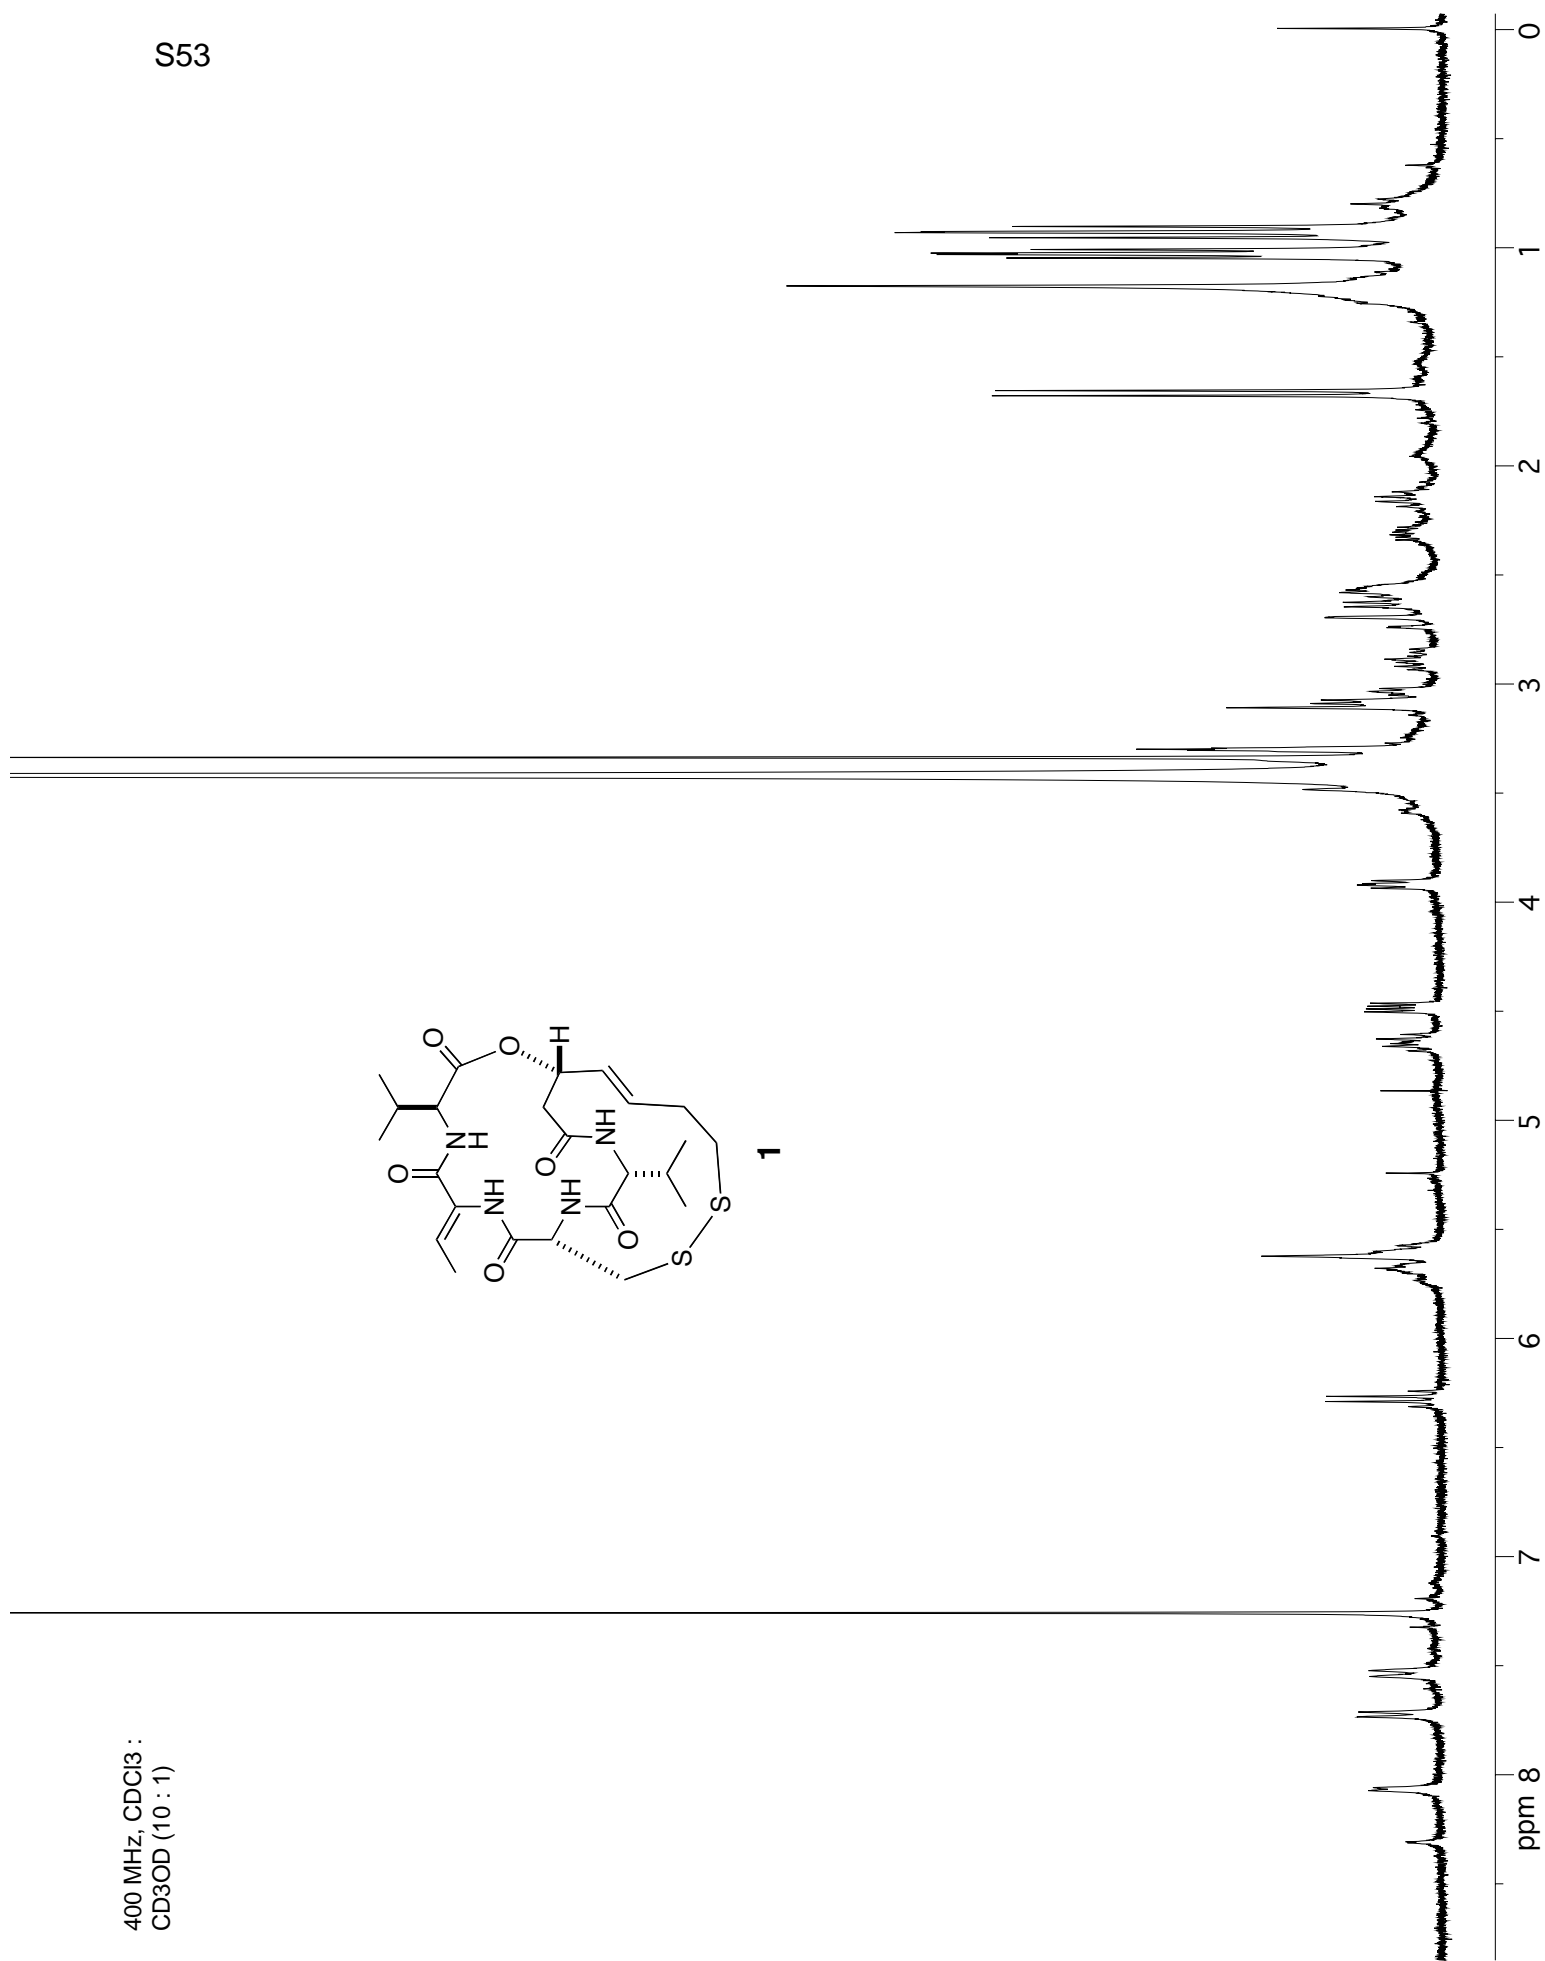

Supplement: NIHMS288528-supplement-1.pdf [file NIHMS288528-supplement-1.pdf]
